# Supplementary material for: Heparin binding epidermal growth factor–like growth factor is a prognostic marker correlated with levels of macrophages infiltrated in lung adenocarcinoma
Source: Front Oncol. 2022 Nov 10;12:963896. doi: 10.3389/fonc.2022.963896 (PMC9686304; doi:10.3389/fonc.2022.963896)
Supplement: Supplementary file 1 [file Table_1.xlsx]

## Sheet: Sheet1
Feature summary of the lung adenocarcinoma specimens and single-cell RNA sequencing data.
No	Patient id	Samples	Tissue origins	Histology	Sex	Age	Smoking	Pathology	EGFR	Stages	No. of single-cells
1	P0006	LUNG_T06	tLung	ADC	Male	54	Ex	MD	na	IA	3426
2	P0008	LUNG_T08	tLung	ADC	Female	60	Never	MD	L858R	IB	3765
3	P0009	LUNG_T09	tLung	ADC	Male	67	Ex	PD	WT	IIA	3840
4	P0018	LUNG_T18	tLung	ADC	Male	62	Ex	MD	del19	IA	3705
5	P0019	LUNG_T19	tLung	ADC	Male	53	Cur	WD	exon 20	IA	4361
6	P0020	LUNG_T20	tLung	ADC	Male	55	Cur	PD	WT	IA	4021
7	P0025	LUNG_T25	tLung	ADC(Double)	Male	69	Ex	na	WT	IA	4374
8	P0028	LUNG_T28	tLung	ADC(Double)	Male	73	Cur	na	WT	IIIA	4705
9	P0030	LUNG_T30	tLung	ADC	Male	56	Never	na	del19	IA	4094
10	P0031	LUNG_T31	tLung	ADC	Male	65	Ex	na	WT	IIIA	5578
11	P0034	LUNG_T34	tLung	ADC	Male	64	Never	MD	WT	IA3	3280
12	P1006	EBUS_06	tL/B	ADC	Male	69	Cur	PD	WT	IV	2303
13	P1028	EBUS_28	tL/B	ADC	Male	52	Ex	na	WT	IV	5182
14	P1049	EBUS_49	tL/B	ADC	Male	63	Cur	PD	WT	IV	1775
15	P1058	BRONCHO_58	tL/B	ADC	Female	80	Never	PD	na	IV	2813
* tLung, early stage tumor lung; tL/B, advanced stage tumor lung; ADC, Adenocarcinoma; Cur, Current smoker; Ex, Ex-smoker; Never, Never smoker; PD, poorly differentiated; MD, moderately differentiated;, WD, well differentiated
