# Supplementary material for: Heparin binding epidermal growth factor–like growth factor is a prognostic marker correlated with levels of macrophages infiltrated in lung adenocarcinoma
Source: Front Oncol. 2022 Nov 10;12:963896. doi: 10.3389/fonc.2022.963896 (PMC9686304; doi:10.3389/fonc.2022.963896)
Supplement: Supplementary file 2 [file Table_2.xlsx]

## Sheet: Sheet1
The meta data table of 69,924 cells of 15 lung adenocarcinoma tumor samples
	orig.ident	nCount_RNA	nFeature_RNA	percent.mito	RNA_snn_res.0.2	seurat_clusters	seurat@active.ident
AAACCTGAGAGTGACC_BRONCHO_58	Lung Tumor	2716.26	859	1.42679	2	2	T lymphocyte
AAACCTGAGTCTTGCA_BRONCHO_58	Lung Tumor	3165.44	1262	1.23676	0	0	T lymphocyte
AAACCTGCATCGATTG_BRONCHO_58	Lung Tumor	1390.44	337	1.67473	8	8	Epithelial
AAACCTGGTTAGATGA_BRONCHO_58	Lung Tumor	3111.54	1310	1.56308	1	1	Myeloid cell
AAACCTGGTTATTCTC_BRONCHO_58	Lung Tumor	2692.55	887	1.37492	2	2	T lymphocyte
AAACCTGTCCAGTAGT_BRONCHO_58	Lung Tumor	2247.41	2202	1.9279	13	13	B lymphocyte
AAACCTGTCCAGTATG_BRONCHO_58	Lung Tumor	2696.97	941	1.71762	0	0	T lymphocyte
AAACCTGTCCTGTACC_BRONCHO_58	Lung Tumor	3925.77	3160	1.3051	1	1	Myeloid cell
AAACCTGTCTGGGCCA_BRONCHO_58	Lung Tumor	2411.6	718	2.2352	0	0	T lymphocyte
AAACGGGCACTAGTAC_BRONCHO_58	Lung Tumor	4032.69	3423	1.09474	17	17	Epithelial
AAACGGGCACTGAAGG_BRONCHO_58	Lung Tumor	2393.5	704	1.97395	2	2	T lymphocyte
AAACGGGCATCGTCGG_BRONCHO_58	Lung Tumor	4289.92	5284	1.37317	17	17	Epithelial
AAACGGGGTCCTGCTT_BRONCHO_58	Lung Tumor	3160.88	1197	0.550982	14	14	T lymphocyte
AAACGGGGTTACGGAG_BRONCHO_58	Lung Tumor	2734.57	874	1.69538	2	2	T lymphocyte
AAACGGGTCAAGGTAA_BRONCHO_58	Lung Tumor	1855.02	470	0.184816	10	10	Myeloid cell
AAACGGGTCATTATCC_BRONCHO_58	Lung Tumor	2616.1	886	1.83466	1	1	Myeloid cell
AAACGGGTCGGTCCGA_BRONCHO_58	Lung Tumor	2275.1	745	2.22285	0	0	T lymphocyte
AAACGGGTCGTACCGG_BRONCHO_58	Lung Tumor	2685.75	958	1.50647	9	9	MAST cell
AAACGGGTCGTGGGAA_BRONCHO_58	Lung Tumor	2996.9	1065	1.41573	2	2	T lymphocyte
AAAGATGAGGCGTACA_BRONCHO_58	Lung Tumor	2541.83	928	2.03491	5	5	NK cell
AAAGATGAGTTAGGTA_BRONCHO_58	Lung Tumor	2608.07	745	2.23359	0	0	T lymphocyte
AAAGATGGTCCTCCAT_BRONCHO_58	Lung Tumor	2700.27	871	1.81068	2	2	T lymphocyte
AAAGATGGTCTAGTGT_BRONCHO_58	Lung Tumor	2873.12	1025	1.63036	0	0	T lymphocyte
AAAGATGGTTGATTCG_BRONCHO_58	Lung Tumor	1771.03	438	0	8	8	Epithelial
AAAGATGTCGCGGATC_BRONCHO_58	Lung Tumor	4363.92	2225	1.18406	1	1	Myeloid cell
AAAGCAAAGTACTTGC_BRONCHO_58	Lung Tumor	1769.03	612	3.16529	8	8	Epithelial
AAAGCAAAGTCAAGCG_BRONCHO_58	Lung Tumor	1993.17	514	0.239831	8	8	Epithelial
AAAGCAACAAAGAATC_BRONCHO_58	Lung Tumor	2054.58	580	0.702412	8	8	Epithelial
AAAGCAACAGTCAGAG_BRONCHO_58	Lung Tumor	4496.27	3399	1.16631	17	17	Epithelial
AAAGCAACATTGCGGC_BRONCHO_58	Lung Tumor	2581.13	1091	1.83022	0	0	T lymphocyte
AAAGCAATCCTTAATC_BRONCHO_58	Lung Tumor	2328.36	616	1.92278	11	11	Fibroblast
AAAGCAATCTGTTGAG_BRONCHO_58	Lung Tumor	2323.42	661	2.08277	5	5	NK cell
AAAGTAGAGCTCTCGG_BRONCHO_58	Lung Tumor	2803.97	962	1.29756	0	0	T lymphocyte
AAAGTAGAGGACTGGT_BRONCHO_58	Lung Tumor	2581.67	873	1.89213	2	2	T lymphocyte
AAAGTAGCACAGACTT_BRONCHO_58	Lung Tumor	3392.15	1965	1.27223	10	10	Myeloid cell
AAAGTAGCAGGACGTA_BRONCHO_58	Lung Tumor	2811.88	918	1.35454	2	2	T lymphocyte
AAAGTAGGTCACTGGC_BRONCHO_58	Lung Tumor	4320.83	3942	1.19085	17	17	Epithelial
AAAGTAGGTGCAACGA_BRONCHO_58	Lung Tumor	4078.52	3658	1.10996	17	17	Epithelial
AAAGTAGGTTCCTCCA_BRONCHO_58	Lung Tumor	2349.87	892	2.27782	4	4	B lymphocyte
AAATGCCAGAATGTGT_BRONCHO_58	Lung Tumor	2878.84	964	1.36071	2	2	T lymphocyte
AAATGCCAGGCCGAAT_BRONCHO_58	Lung Tumor	2607.52	871	1.7038	2	2	T lymphocyte
AAATGCCCAATAGCAA_BRONCHO_58	Lung Tumor	4841.34	3889	0.945104	11	11	Fibroblast
AAATGCCCAGAGCCAA_BRONCHO_58	Lung Tumor	4287.04	2939	1.13897	1	1	Myeloid cell
AAATGCCCAGTATCTG_BRONCHO_58	Lung Tumor	4176.09	4813	1.31077	17	17	Epithelial
AAATGCCGTGTCCTCT_BRONCHO_58	Lung Tumor	2961.31	981	1.33269	2	2	T lymphocyte
AAATGCCTCTTTACGT_BRONCHO_58	Lung Tumor	2596.38	860	1.77295	0	0	T lymphocyte
AACACGTCACGGACAA_BRONCHO_58	Lung Tumor	2760.9	898	1.55199	0	0	T lymphocyte
AACCATGCACTACAGT_BRONCHO_58	Lung Tumor	4144.61	4268	1.25112	17	17	Epithelial
AACCATGCATTTGCCC_BRONCHO_58	Lung Tumor	2943.57	979	0.980957	2	2	T lymphocyte
AACCATGGTCCGAATT_BRONCHO_58	Lung Tumor	2498.17	795	0.335274	8	8	Epithelial
AACCGCGAGCCCAGCT_BRONCHO_58	Lung Tumor	2537.77	994	2.1186	0	0	T lymphocyte
AACCGCGGTCGCGAAA_BRONCHO_58	Lung Tumor	3776.47	2048	1.39923	1	1	Myeloid cell
AACGTTGCAGGACGTA_BRONCHO_58	Lung Tumor	3724.04	1900	1.47789	1	1	Myeloid cell
AACGTTGGTTGTGGAG_BRONCHO_58	Lung Tumor	2517.8	838	1.78656	2	2	T lymphocyte
AACTCAGAGACGCTTT_BRONCHO_58	Lung Tumor	2366.59	714	1.96623	2	2	T lymphocyte
AACTCAGAGCGAGAAA_BRONCHO_58	Lung Tumor	2557.65	765	1.95128	5	5	NK cell
AACTCAGAGGAGTACC_BRONCHO_58	Lung Tumor	2342.54	659	1.89508	0	0	T lymphocyte
AACTCAGGTCGCGGTT_BRONCHO_58	Lung Tumor	2114.93	760	2.41088	0	0	T lymphocyte
AACTCCCGTAGAAAGG_BRONCHO_58	Lung Tumor	2735.28	904	1.88556	5	5	NK cell
AACTCCCGTTGCGCAC_BRONCHO_58	Lung Tumor	3230.96	1315	1.33828	2	2	T lymphocyte
AACTCCCTCCAAATGC_BRONCHO_58	Lung Tumor	1941.34	538	0.752337	10	10	Myeloid cell
AACTCTTAGCACACAG_BRONCHO_58	Lung Tumor	2693.06	886	1.10085	5	5	NK cell
AACTCTTAGCGTGAAC_BRONCHO_58	Lung Tumor	3059.01	1126	0.270865	10	10	Myeloid cell
AACTCTTCAGTTCATG_BRONCHO_58	Lung Tumor	2344.68	776	2.33737	1	1	Myeloid cell
AACTCTTGTACTCAAC_BRONCHO_58	Lung Tumor	2181.59	734	2.86682	4	4	B lymphocyte
AACTCTTGTTGAACTC_BRONCHO_58	Lung Tumor	3310.06	2490	1.50158	0	0	T lymphocyte
AACTCTTTCTGAAAGA_BRONCHO_58	Lung Tumor	2791.43	881	1.47547	2	2	T lymphocyte
AACTGGTAGCCCTAAT_BRONCHO_58	Lung Tumor	4149.91	3902	1.44387	17	17	Epithelial
AACTGGTAGGCCGAAT_BRONCHO_58	Lung Tumor	3955.14	2743	1.19049	11	11	Fibroblast
AACTGGTCAGCATACT_BRONCHO_58	Lung Tumor	2990.34	1083	1.59091	5	5	NK cell
AACTGGTGTAGCTTGT_BRONCHO_58	Lung Tumor	4282.61	3577	1.18717	17	17	Epithelial
AACTGGTGTTCGAATC_BRONCHO_58	Lung Tumor	3100.38	1269	1.23429	0	0	T lymphocyte
AACTGGTGTTCTGAAC_BRONCHO_58	Lung Tumor	3747.41	2408	1.58578	1	1	Myeloid cell
AACTGGTTCACAACGT_BRONCHO_58	Lung Tumor	2841.89	1081	1.62096	2	2	T lymphocyte
AACTGGTTCAGCTGGC_BRONCHO_58	Lung Tumor	2770.95	951	1.70956	0	0	T lymphocyte
AACTTTCAGATATGCA_BRONCHO_58	Lung Tumor	2911.03	1127	1.785	0	0	T lymphocyte
AACTTTCAGGAATCGC_BRONCHO_58	Lung Tumor	2763.32	861	1.63909	2	2	T lymphocyte
AACTTTCGTCCAGTGC_BRONCHO_58	Lung Tumor	3408.57	1861	0.961812	17	17	Epithelial
AACTTTCGTGAGGGTT_BRONCHO_58	Lung Tumor	2349.17	764	1.84771	4	4	B lymphocyte
AACTTTCGTGTGCGTC_BRONCHO_58	Lung Tumor	2615.92	832	1.93166	2	2	T lymphocyte
AAGACCTTCCCGACTT_BRONCHO_58	Lung Tumor	2466.86	847	1.94791	4	4	B lymphocyte
AAGACCTTCGTAGATC_BRONCHO_58	Lung Tumor	3160.21	1226	1.59236	0	0	T lymphocyte
AAGCCGCAGGCACATG_BRONCHO_58	Lung Tumor	3867.13	3459	1.43222	17	17	Epithelial
AAGCCGCCAACGCACC_BRONCHO_58	Lung Tumor	2246.24	761	0.0995586	8	8	Epithelial
AAGCCGCTCTTTACGT_BRONCHO_58	Lung Tumor	2902.7	1099	1.49851	0	0	T lymphocyte
AAGGAGCCACACAGAG_BRONCHO_58	Lung Tumor	2667.17	948	1.91056	5	5	NK cell
AAGGAGCGTAAATACG_BRONCHO_58	Lung Tumor	2835.06	911	1.4209	2	2	T lymphocyte
AAGGAGCTCACATAGC_BRONCHO_58	Lung Tumor	3074.4	1096	1.75701	2	2	T lymphocyte
AAGGCAGAGAATTGTG_BRONCHO_58	Lung Tumor	4334.78	4520	1.28595	1	1	Myeloid cell
AAGGCAGAGGTGCTAG_BRONCHO_58	Lung Tumor	3838.39	2604	1.44824	1	1	Myeloid cell
AAGGCAGAGTATGACA_BRONCHO_58	Lung Tumor	2535.34	806	1.3476	2	2	T lymphocyte
AAGGCAGCATGATCCA_BRONCHO_58	Lung Tumor	2772.6	882	1.64305	2	2	T lymphocyte
AAGGCAGGTGAAATCA_BRONCHO_58	Lung Tumor	2253.33	856	1.80267	0	0	T lymphocyte
AAGGCAGTCTTACCTA_BRONCHO_58	Lung Tumor	3133.89	1170	1.3272	5	5	NK cell
AAGGTTCAGCCAACAG_BRONCHO_58	Lung Tumor	2956.32	1056	0.669922	2	2	T lymphocyte
AAGGTTCAGCTAAGAT_BRONCHO_58	Lung Tumor	4472.57	5951	0.92565	17	17	Epithelial
AAGGTTCCATATACGC_BRONCHO_58	Lung Tumor	1973.62	502	3.04799	8	8	Epithelial
AAGGTTCCATATGAGA_BRONCHO_58	Lung Tumor	2485.51	757	1.43321	2	2	T lymphocyte
AAGGTTCCATCAGTAC_BRONCHO_58	Lung Tumor	594.269	323	1.92696	13	13	B lymphocyte
AAGGTTCGTAAGTGTA_BRONCHO_58	Lung Tumor	2882.61	944	1.58504	0	0	T lymphocyte
AAGGTTCGTATTAGCC_BRONCHO_58	Lung Tumor	3563.85	1758	1.3893	11	11	Fibroblast
AAGGTTCGTCCGTTAA_BRONCHO_58	Lung Tumor	4243.1	3889	1.65687	17	17	Epithelial
AAGGTTCGTTACGCGC_BRONCHO_58	Lung Tumor	3775.2	3998	1.33537	17	17	Epithelial
AAGGTTCTCACGAAGG_BRONCHO_58	Lung Tumor	4742.83	5187	1.12976	17	17	Epithelial
AAGGTTCTCTCCCTGA_BRONCHO_58	Lung Tumor	2993.51	1154	1.41936	5	5	NK cell
AAGTCTGGTGAAGGCT_BRONCHO_58	Lung Tumor	2839.22	929	1.65448	2	2	T lymphocyte
AAGTCTGTCGCCTGAG_BRONCHO_58	Lung Tumor	4452.04	4526	1.30381	17	17	Epithelial
AATCCAGAGGGATCTG_BRONCHO_58	Lung Tumor	3828.29	3216	1.89007	17	17	Epithelial
AATCCAGAGTCGCCGT_BRONCHO_58	Lung Tumor	2717.57	906	1.51349	1	1	Myeloid cell
AATCCAGAGTTAGGTA_BRONCHO_58	Lung Tumor	2456.68	886	1.68918	0	0	T lymphocyte
AATCCAGGTATTCGTG_BRONCHO_58	Lung Tumor	2385.27	814	2.11371	4	4	B lymphocyte
AATCGGTCACCCATTC_BRONCHO_58	Lung Tumor	4676.38	3951	1.02176	17	17	Epithelial
AATCGGTCATGAACCT_BRONCHO_58	Lung Tumor	2411.72	646	1.55688	0	0	T lymphocyte
AATCGGTGTAAATGAC_BRONCHO_58	Lung Tumor	2414.55	676	1.93902	2	2	T lymphocyte
AATCGGTGTAAGTGGC_BRONCHO_58	Lung Tumor	2736.83	922	1.72438	0	0	T lymphocyte
AATCGGTGTACATCCA_BRONCHO_58	Lung Tumor	4275.4	2826	1.19321	1	1	Myeloid cell
AATCGGTGTCTCTCGT_BRONCHO_58	Lung Tumor	2416.49	703	1.56353	2	2	T lymphocyte
AATCGGTTCACGCGGT_BRONCHO_58	Lung Tumor	2803.28	943	1.94427	2	2	T lymphocyte
CGTCCATCACGTTGGC_BRONCHO_58	Lung Tumor	2710.72	942	1.87155	1	1	Myeloid cell
CGTCCATGTAGCGATG_BRONCHO_58	Lung Tumor	2743.6	898	1.66494	0	0	T lymphocyte
CGTCCATGTCTTCGTC_BRONCHO_58	Lung Tumor	3004.82	1076	1.12734	0	0	T lymphocyte
CGTCCATTCTCAACTT_BRONCHO_58	Lung Tumor	2570.06	844	1.83386	2	2	T lymphocyte
CGTCCATTCTGTTGAG_BRONCHO_58	Lung Tumor	2372.59	706	2.24922	2	2	T lymphocyte
CGTCTACAGCGTTCCG_BRONCHO_58	Lung Tumor	4781.49	6989	1.13431	17	17	Epithelial
CGTCTACAGGGTCGAT_BRONCHO_58	Lung Tumor	4283.79	4191	1.1123	10	10	Myeloid cell
CGTCTACCACGGTAGA_BRONCHO_58	Lung Tumor	2873.65	1086	1.45309	11	11	Fibroblast
CGTCTACGTAGCGATG_BRONCHO_58	Lung Tumor	2935.27	1030	1.52458	5	5	NK cell
CGTGAGCAGCGGCTTC_BRONCHO_58	Lung Tumor	2580.36	927	1.70389	4	4	B lymphocyte
CGTGAGCAGGAGCGTT_BRONCHO_58	Lung Tumor	3354.49	1303	1.19378	0	0	T lymphocyte
CGTGAGCCAAAGTGCG_BRONCHO_58	Lung Tumor	2154.6	665	2.10481	1	1	Myeloid cell
CGTGAGCCATTCCTGC_BRONCHO_58	Lung Tumor	2456.32	996	2.1613	0	0	T lymphocyte
CGTGAGCGTAAGGGCT_BRONCHO_58	Lung Tumor	2539.23	823	1.87278	5	5	NK cell
CGTGTAAAGGGTATCG_BRONCHO_58	Lung Tumor	2661.12	879	1.86059	0	0	T lymphocyte
CGTGTAAAGTACGCCC_BRONCHO_58	Lung Tumor	2127.62	570	1.64137	2	2	T lymphocyte
CGTGTAACACTGTCGG_BRONCHO_58	Lung Tumor	2488.12	753	2.30775	2	2	T lymphocyte
CGTGTAACAGCTGTGC_BRONCHO_58	Lung Tumor	3571.6	1432	1.12694	0	0	T lymphocyte
CGTGTAAGTGACGCCT_BRONCHO_58	Lung Tumor	4368.18	3552	0.825555	1	1	Myeloid cell
CGTGTCTCAGGGTACA_BRONCHO_58	Lung Tumor	2523.25	772	1.68145	2	2	T lymphocyte
CGTGTCTGTACCGTTA_BRONCHO_58	Lung Tumor	4079.54	2974	1.30416	1	1	Myeloid cell
CGTGTCTGTATCGCAT_BRONCHO_58	Lung Tumor	2728.38	956	1.63891	0	0	T lymphocyte
CGTGTCTGTCGCGAAA_BRONCHO_58	Lung Tumor	2624.17	951	1.68162	0	0	T lymphocyte
CGTGTCTGTTCACCTC_BRONCHO_58	Lung Tumor	2757.9	949	2.08863	2	2	T lymphocyte
CGTGTCTTCCTTAATC_BRONCHO_58	Lung Tumor	3899.93	2098	1.29652	1	1	Myeloid cell
CGTTAGAAGAGTACCG_BRONCHO_58	Lung Tumor	2592.47	785	1.53769	2	2	T lymphocyte
CGTTAGAAGGCTACGA_BRONCHO_58	Lung Tumor	2620.19	828	0.269543	8	8	Epithelial
CGTTAGAAGGTAGCTG_BRONCHO_58	Lung Tumor	2758.79	918	1.85744	0	0	T lymphocyte
CGTTAGACACGGTAGA_BRONCHO_58	Lung Tumor	2733.14	979	1.69007	5	5	NK cell
CGTTCTGCAATAACGA_BRONCHO_58	Lung Tumor	4073.7	2024	1.24959	0	0	T lymphocyte
CGTTCTGGTCATGCAT_BRONCHO_58	Lung Tumor	3532.41	1428	1.10323	0	0	T lymphocyte
CGTTCTGGTCTAGTGT_BRONCHO_58	Lung Tumor	2863.66	1066	1.80341	2	2	T lymphocyte
CGTTCTGGTGAAAGAG_BRONCHO_58	Lung Tumor	4221.5	3805	1.29644	17	17	Epithelial
CGTTCTGGTTAAGATG_BRONCHO_58	Lung Tumor	4564.48	4532	1.1597	17	17	Epithelial
CGTTCTGTCAAGATCC_BRONCHO_58	Lung Tumor	4081.52	2687	1.24894	10	10	Myeloid cell
CGTTCTGTCACAACGT_BRONCHO_58	Lung Tumor	2772.07	981	1.37924	2	2	T lymphocyte
CGTTCTGTCACTCCTG_BRONCHO_58	Lung Tumor	3780.29	2085	1.35197	0	0	T lymphocyte
CGTTCTGTCACTTCAT_BRONCHO_58	Lung Tumor	2194.52	639	1.72621	2	2	T lymphocyte
CGTTGGGAGCTCCTCT_BRONCHO_58	Lung Tumor	2649.18	950	1.95591	5	5	NK cell
CTAACTTAGTCATGCT_BRONCHO_58	Lung Tumor	4120.86	4702	1.00567	17	17	Epithelial
CTAACTTTCGCTGATA_BRONCHO_58	Lung Tumor	2904.93	1064	1.52709	0	0	T lymphocyte
CTAAGACAGAAACCGC_BRONCHO_58	Lung Tumor	3116.3	1504	1.95759	1	1	Myeloid cell
CTAAGACAGCCCTAAT_BRONCHO_58	Lung Tumor	2510.12	756	1.7655	5	5	NK cell
CTAAGACAGCGTGAGT_BRONCHO_58	Lung Tumor	2881.81	1086	0.383304	8	8	Epithelial
CTAAGACAGTCGATAA_BRONCHO_58	Lung Tumor	2713.71	862	1.82502	5	5	NK cell
CTAAGACCAAGCGATG_BRONCHO_58	Lung Tumor	2280.6	715	2.36096	0	0	T lymphocyte
CTAAGACCACGACTCG_BRONCHO_58	Lung Tumor	2661.92	977	0.206955	10	10	Myeloid cell
CTAATGGAGGTGCAAC_BRONCHO_58	Lung Tumor	2682.88	901	1.38121	0	0	T lymphocyte
CTAATGGAGTGGCACA_BRONCHO_58	Lung Tumor	2266.43	687	2.18475	0	0	T lymphocyte
CTAATGGCAGTAAGAT_BRONCHO_58	Lung Tumor	2692.72	884	0.918893	2	2	T lymphocyte
CTAATGGCAGTCCTTC_BRONCHO_58	Lung Tumor	2460.56	872	1.55207	0	0	T lymphocyte
CTAATGGGTATTAGCC_BRONCHO_58	Lung Tumor	3007.42	1047	1.32722	0	0	T lymphocyte
CTAATGGGTTGGGACA_BRONCHO_58	Lung Tumor	2682.48	876	2.03278	5	5	NK cell
CTACACCAGGACAGAA_BRONCHO_58	Lung Tumor	2980.75	1234	1.62605	0	0	T lymphocyte
CTACACCCACAGCGTC_BRONCHO_58	Lung Tumor	1961.53	493	0.699381	8	8	Epithelial
CTACACCGTGTGGTTT_BRONCHO_58	Lung Tumor	2846.09	954	1.78467	5	5	NK cell
CTACATTAGCCCGAAA_BRONCHO_58	Lung Tumor	3134.52	1238	1.42644	0	0	T lymphocyte
CTACATTCACATCTTT_BRONCHO_58	Lung Tumor	4443.77	3091	1.27945	1	1	Myeloid cell
CTACATTCAGGCTGAA_BRONCHO_58	Lung Tumor	2926.95	1103	2.03968	1	1	Myeloid cell
CTACATTCATATGCTG_BRONCHO_58	Lung Tumor	2111.49	543	0.159938	8	8	Epithelial
CTACATTTCGCTAGCG_BRONCHO_58	Lung Tumor	2752.67	966	1.78347	5	5	NK cell
CTACCCAAGATGTAAC_BRONCHO_58	Lung Tumor	5322.93	5065	0.844996	16	16	Endothelial
CTACCCAAGTAGGTGC_BRONCHO_58	Lung Tumor	5036.19	4697	0.62854	17	17	Epithelial
CTACCCACAACTGCGC_BRONCHO_58	Lung Tumor	4285.63	2498	1.11304	0	0	T lymphocyte
CTACCCACATCGTCGG_BRONCHO_58	Lung Tumor	4601.45	5251	0.788352	17	17	Epithelial
CTACCCATCAACACCA_BRONCHO_58	Lung Tumor	2786.7	1023	1.57243	2	2	T lymphocyte
CTACGTCTCAAGGTAA_BRONCHO_58	Lung Tumor	2812.23	938	2.30512	1	1	Myeloid cell
CTACGTCTCATTGCCC_BRONCHO_58	Lung Tumor	1912.34	519	0	10	10	Myeloid cell
CTACGTCTCGCCTGTT_BRONCHO_58	Lung Tumor	3894.26	2965	0.592742	17	17	Epithelial
CTACGTCTCTGCTGTC_BRONCHO_58	Lung Tumor	2665.1	983	1.94623	4	4	B lymphocyte
CTACGTCTCTTGTATC_BRONCHO_58	Lung Tumor	2313.57	668	2.28404	0	0	T lymphocyte
CTAGAGTAGTTCGCAT_BRONCHO_58	Lung Tumor	4093.85	6161	1.22963	17	17	Epithelial
CTAGAGTGTACGAAAT_BRONCHO_58	Lung Tumor	3210.75	1294	1.90537	1	1	Myeloid cell
CTAGAGTGTGATGTCT_BRONCHO_58	Lung Tumor	2783.92	876	1.82757	2	2	T lymphocyte
CTAGAGTGTGGTGTAG_BRONCHO_58	Lung Tumor	2838.32	990	1.92281	5	5	NK cell
CTAGAGTTCACCACCT_BRONCHO_58	Lung Tumor	3806.73	2093	1.36874	1	1	Myeloid cell
CTAGAGTTCCGCAAGC_BRONCHO_58	Lung Tumor	2353.74	750	2.16088	0	0	T lymphocyte
CTAGAGTTCCTAAGTG_BRONCHO_58	Lung Tumor	2979.54	1051	0.305015	10	10	Myeloid cell
CTAGAGTTCGTACGGC_BRONCHO_58	Lung Tumor	4504.4	4792	1.0932	7	7	Epithelial
CTAGAGTTCTCCAACC_BRONCHO_58	Lung Tumor	2722.31	940	1.60086	2	2	T lymphocyte
CTAGAGTTCTTCGGTC_BRONCHO_58	Lung Tumor	2656.97	929	1.45656	2	2	T lymphocyte
CTAGAGTTCTTGCAAG_BRONCHO_58	Lung Tumor	2423.03	751	2.07825	2	2	T lymphocyte
CTAGCCTCATGCCCGA_BRONCHO_58	Lung Tumor	3267.57	1264	1.21258	0	0	T lymphocyte
CTAGCCTTCCGAAGAG_BRONCHO_58	Lung Tumor	2801.34	969	1.64392	0	0	T lymphocyte
CTAGTGAAGATATGGT_BRONCHO_58	Lung Tumor	2916.11	913	1.61093	2	2	T lymphocyte
CTAGTGAAGTCATGCT_BRONCHO_58	Lung Tumor	3903.71	2135	1.42743	1	1	Myeloid cell
CTAGTGACAATGGATA_BRONCHO_58	Lung Tumor	2732.18	914	1.33523	2	2	T lymphocyte
CTAGTGACAGACGTAG_BRONCHO_58	Lung Tumor	3684.16	1660	1.32421	0	0	T lymphocyte
CTAGTGACAGTCGATT_BRONCHO_58	Lung Tumor	4843.57	4213	0.833201	17	17	Epithelial
CTAGTGAGTACGCTGC_BRONCHO_58	Lung Tumor	2308.31	782	2.13299	4	4	B lymphocyte
CTAGTGAGTCATGCCG_BRONCHO_58	Lung Tumor	4672.95	5351	0.985377	17	17	Epithelial
CTAGTGATCTGTTGAG_BRONCHO_58	Lung Tumor	2883.55	1024	1.2496	0	0	T lymphocyte
CTCACACAGTGTTAGA_BRONCHO_58	Lung Tumor	4043.25	3219	1.27775	17	17	Epithelial
CTCACACGTTCGGGCT_BRONCHO_58	Lung Tumor	2854.52	1055	1.40849	0	0	T lymphocyte
CTCACACTCGGTTCGG_BRONCHO_58	Lung Tumor	3099.58	1282	1.48431	1	1	Myeloid cell
CTCAGAAAGATAGCAT_BRONCHO_58	Lung Tumor	2888.28	994	1.5765	2	2	T lymphocyte
CTCAGAACAAGCTGGA_BRONCHO_58	Lung Tumor	2470.46	812	1.61333	0	0	T lymphocyte
CTCAGAACATAAAGGT_BRONCHO_58	Lung Tumor	2510.08	806	2.27318	1	1	Myeloid cell
CTCAGAAGTCCGTTAA_BRONCHO_58	Lung Tumor	3023.06	1044	1.66902	2	2	T lymphocyte
CTCAGAATCACGGTTA_BRONCHO_58	Lung Tumor	4243.41	8656	0.887668	17	17	Epithelial
CTCATTAAGGTAGCTG_BRONCHO_58	Lung Tumor	2551.13	860	1.6777	9	9	MAST cell
CTCATTACACAACGCC_BRONCHO_58	Lung Tumor	3020.84	1163	1.51265	0	0	T lymphocyte
CTCATTAGTTGATTGC_BRONCHO_58	Lung Tumor	2667.74	843	2.00944	5	5	NK cell
CTCATTATCTAAGCCA_BRONCHO_58	Lung Tumor	4067.42	2968	0.914687	17	17	Epithelial
CTCATTATCTTACCTA_BRONCHO_58	Lung Tumor	3506.12	1413	1.34295	5	5	NK cell
CTCCTAGAGCTGAACG_BRONCHO_58	Lung Tumor	831.14	255	7.88275	13	13	B lymphocyte
CTCCTAGCAAACCTAC_BRONCHO_58	Lung Tumor	1728.77	509	2.95209	8	8	Epithelial
CTCCTAGCACAGACTT_BRONCHO_58	Lung Tumor	1919.86	593	2.6677	8	8	Epithelial
CTCCTAGCACCAGTTA_BRONCHO_58	Lung Tumor	4843.53	2955	1.5569	19	19	Epithelial
CTCCTAGCAGCTCGAC_BRONCHO_58	Lung Tumor	2360.68	709	1.73528	2	2	T lymphocyte
CTCCTAGCATTGCGGC_BRONCHO_58	Lung Tumor	4177.13	2929	1.03819	1	1	Myeloid cell
CTCCTAGGTATATGAG_BRONCHO_58	Lung Tumor	2173.58	582	1.15847	1	1	Myeloid cell
CTCCTAGGTGCGCTTG_BRONCHO_58	Lung Tumor	3035.01	1064	1.37687	2	2	T lymphocyte
CTCCTAGTCACGATGT_BRONCHO_58	Lung Tumor	3399.49	1333	1.17403	0	0	T lymphocyte
CTCCTAGTCGGATGTT_BRONCHO_58	Lung Tumor	2537.32	811	1.06874	2	2	T lymphocyte
CTCGAAAAGAAACCTA_BRONCHO_58	Lung Tumor	2904.8	966	1.55704	2	2	T lymphocyte
CTCGAAAAGTGAACGC_BRONCHO_58	Lung Tumor	2991.59	1103	1.55841	5	5	NK cell
CTCGAAAAGTTCGCAT_BRONCHO_58	Lung Tumor	5002.75	5886	0.904497	17	17	Epithelial
CTCGAAACACAGGTTT_BRONCHO_58	Lung Tumor	4053.27	1993	1.18858	2	2	T lymphocyte
CTCGAAAGTTCCCTTG_BRONCHO_58	Lung Tumor	2919.71	1087	1.87448	2	2	T lymphocyte
CTCGAAATCCGTCAAA_BRONCHO_58	Lung Tumor	2253.04	653	2.31202	0	0	T lymphocyte
CTCGAGGCAAGTCTAC_BRONCHO_58	Lung Tumor	1395.62	388	4.02503	8	8	Epithelial
CTCGAGGCACATCCAA_BRONCHO_58	Lung Tumor	5545.07	4815	1.15307	19	19	Epithelial
CTCGAGGCACCAGATT_BRONCHO_58	Lung Tumor	4183.15	3245	1.39455	1	1	Myeloid cell
CTCGAGGTCGCTAGCG_BRONCHO_58	Lung Tumor	3505.07	1650	1.60368	1	1	Myeloid cell
CTCGGAGAGAACAATC_BRONCHO_58	Lung Tumor	2912.42	1037	1.77391	5	5	NK cell
CTCGGAGAGAATAGGG_BRONCHO_58	Lung Tumor	3018.39	1085	1.2695	0	0	T lymphocyte
CTCGGAGCAGCTCCGA_BRONCHO_58	Lung Tumor	3006.52	1067	1.52837	0	0	T lymphocyte
CTCGGAGGTAGCACGA_BRONCHO_58	Lung Tumor	1970.37	802	2.52865	8	8	Epithelial
CTCGGAGTCTCAAACG_BRONCHO_58	Lung Tumor	4988.34	4682	1.0423	1	1	Myeloid cell
CTCGGAGTCTGAAAGA_BRONCHO_58	Lung Tumor	2736.23	914	1.44911	2	2	T lymphocyte
CTCGGAGTCTTGTTTG_BRONCHO_58	Lung Tumor	3020.2	1026	1.28445	0	0	T lymphocyte
CTCGGGAGTCTAGCGC_BRONCHO_58	Lung Tumor	3177.48	1180	1.69181	0	0	T lymphocyte
CTCGGGATCGCTTGTC_BRONCHO_58	Lung Tumor	2815.44	1004	2.32153	1	1	Myeloid cell
CTCGGGATCGGCTACG_BRONCHO_58	Lung Tumor	3182.31	1153	1.33923	2	2	T lymphocyte
CTCGGGATCTGTCTCG_BRONCHO_58	Lung Tumor	3777.6	1636	0.853856	11	11	Fibroblast
CTCGGGATCTTACCTA_BRONCHO_58	Lung Tumor	2090.7	609	2.36431	4	4	B lymphocyte
CTCGTACAGCGTAATA_BRONCHO_58	Lung Tumor	4506.04	3743	0.985053	17	17	Epithelial
CTCGTACCACAACGCC_BRONCHO_58	Lung Tumor	4716.85	7044	1.09475	17	17	Epithelial
CTCGTACGTCACACGC_BRONCHO_58	Lung Tumor	2689.97	1012	1.98801	9	9	MAST cell
CTCGTACGTCTCTCGT_BRONCHO_58	Lung Tumor	3714.08	2796	1.33973	17	17	Epithelial
CTCGTACGTGGCCCTA_BRONCHO_58	Lung Tumor	4089.08	2804	1.31548	1	1	Myeloid cell
CTCGTACTCCAGTAGT_BRONCHO_58	Lung Tumor	2823.69	980	1.6692	5	5	NK cell
CTCGTCAAGCGTGAAC_BRONCHO_58	Lung Tumor	2447.73	917	1.65744	0	0	T lymphocyte
CTCGTCAAGGTGCTAG_BRONCHO_58	Lung Tumor	2631.93	816	2.14612	0	0	T lymphocyte
CTCGTCAAGTCTCAAC_BRONCHO_58	Lung Tumor	3759.18	1626	1.24167	0	0	T lymphocyte
CTCGTCAAGTGTACTC_BRONCHO_58	Lung Tumor	4576.49	6232	1.21624	17	17	Epithelial
CTCGTCACAAACAACA_BRONCHO_58	Lung Tumor	3153.37	1151	1.16838	2	2	T lymphocyte
CTCGTCATCGTGGTCG_BRONCHO_58	Lung Tumor	3802.1	3764	1.48441	17	17	Epithelial
CTCTAATAGATCTGAA_BRONCHO_58	Lung Tumor	2413.8	757	2.29444	0	0	T lymphocyte
CTCTAATAGCCCAGCT_BRONCHO_58	Lung Tumor	3999.92	2528	1.26008	1	1	Myeloid cell
CTCTAATAGCTAGTGG_BRONCHO_58	Lung Tumor	2382.27	657	2.32332	2	2	T lymphocyte
CTCTAATCAGACAAGC_BRONCHO_58	Lung Tumor	2296.9	692	2.14135	1	1	Myeloid cell
CTCTAATTCCTAGGGC_BRONCHO_58	Lung Tumor	3827.59	3258	1.36137	1	1	Myeloid cell
CTCTAATTCCTAGTGA_BRONCHO_58	Lung Tumor	4026.01	3889	1.33739	1	1	Myeloid cell
CTCTACGCAGTTTACG_BRONCHO_58	Lung Tumor	2999.41	1074	1.25245	2	2	T lymphocyte
CTCTACGGTCCGCTGA_BRONCHO_58	Lung Tumor	1957.1	609	2.54371	0	0	T lymphocyte
CTCTACGGTGGTGTAG_BRONCHO_58	Lung Tumor	2744.77	870	1.67981	5	5	NK cell
CTCTACGTCCAGTATG_BRONCHO_58	Lung Tumor	2813.39	959	1.58821	0	0	T lymphocyte
CTCTACGTCTTCATGT_BRONCHO_58	Lung Tumor	2204.95	677	1.68137	0	0	T lymphocyte
CTCTGGTAGTGCGATG_BRONCHO_58	Lung Tumor	2742.06	920	1.79514	0	0	T lymphocyte
CTCTGGTCACACCGAC_BRONCHO_58	Lung Tumor	3676.07	1837	0.166275	8	8	Epithelial
CTCTGGTGTAGCTCCG_BRONCHO_58	Lung Tumor	2643.06	906	1.67168	0	0	T lymphocyte
CTCTGGTGTCGCGAAA_BRONCHO_58	Lung Tumor	3063.64	1288	2.4851	1	1	Myeloid cell
CTCTGGTTCGAACGGA_BRONCHO_58	Lung Tumor	4151.53	3331	0.876066	17	17	Epithelial
CTCTGGTTCGTGTAGT_BRONCHO_58	Lung Tumor	1596.93	388	3.67417	9	9	MAST cell
CTCTGGTTCTCGATGA_BRONCHO_58	Lung Tumor	2693.22	869	1.60713	2	2	T lymphocyte
CTGAAACCAGCTGGCT_BRONCHO_58	Lung Tumor	4033.44	3226	1.30792	17	17	Epithelial
CTGAAACGTACAAGTA_BRONCHO_58	Lung Tumor	3567.23	1509	1.34643	0	0	T lymphocyte
CTGAAACGTGCAGACA_BRONCHO_58	Lung Tumor	2498.27	748	1.94317	2	2	T lymphocyte
CTGAAGTAGTCCGTAT_BRONCHO_58	Lung Tumor	2569.94	793	1.66968	0	0	T lymphocyte
CTGAAGTCAGGCGATA_BRONCHO_58	Lung Tumor	2328.62	688	1.99267	2	2	T lymphocyte
CTGAAGTTCAGTTAGC_BRONCHO_58	Lung Tumor	2693.11	917	1.83075	5	5	NK cell
CTGAAGTTCTCATTCA_BRONCHO_58	Lung Tumor	2697.65	871	1.55854	0	0	T lymphocyte
CTGATAGAGCGTGTCC_BRONCHO_58	Lung Tumor	4392.48	3468	1.40098	17	17	Epithelial
CTGATAGCAACTGGCC_BRONCHO_58	Lung Tumor	5055.99	7743	0.772573	17	17	Epithelial
CTGATAGTCCCTTGTG_BRONCHO_58	Lung Tumor	4288.01	4925	1.14333	17	17	Epithelial
CTGATCCCACTCGACG_BRONCHO_58	Lung Tumor	2544.28	893	1.82502	5	5	NK cell
CTGATCCCAGTAACGG_BRONCHO_58	Lung Tumor	2874.23	1202	1.60322	1	1	Myeloid cell
CTGATCCGTAGAGTGC_BRONCHO_58	Lung Tumor	2638.77	873	1.45092	2	2	T lymphocyte
CTGATCCGTGTTTGTG_BRONCHO_58	Lung Tumor	3142.51	1252	1.35855	0	0	T lymphocyte
CTGCCTAAGATAGCAT_BRONCHO_58	Lung Tumor	4415.93	4104	1.22974	17	17	Epithelial
CTGCCTAAGGATGGTC_BRONCHO_58	Lung Tumor	2439.86	780	1.15381	0	0	T lymphocyte
CTGCCTAAGTACGTTC_BRONCHO_58	Lung Tumor	2654.62	1055	2.02613	4	4	B lymphocyte
CTGCCTAGTCCTGCTT_BRONCHO_58	Lung Tumor	4336.14	6018	1.20163	17	17	Epithelial
CTGCCTAGTGTTCTTT_BRONCHO_58	Lung Tumor	2863.02	943	1.40753	2	2	T lymphocyte
CTGCCTATCCGGGTGT_BRONCHO_58	Lung Tumor	2816.1	962	1.72776	5	5	NK cell
CTGCGGAAGAGTAAGG_BRONCHO_58	Lung Tumor	2402.16	716	1.92962	1	1	Myeloid cell
CTGCGGAAGATAGCAT_BRONCHO_58	Lung Tumor	2675.97	918	1.75035	0	0	T lymphocyte
CTGCGGACAAACTGCT_BRONCHO_58	Lung Tumor	2557.89	920	2.18404	4	4	B lymphocyte
CTGCGGAGTCAACTGT_BRONCHO_58	Lung Tumor	3398.25	1388	1.50091	2	2	T lymphocyte
CTGCGGAGTCATCGGC_BRONCHO_58	Lung Tumor	3792.4	2276	1.7329	1	1	Myeloid cell
CTGCGGATCAGTTTGG_BRONCHO_58	Lung Tumor	2262.01	640	1.69349	2	2	T lymphocyte
CTGCGGATCGTAGGTT_BRONCHO_58	Lung Tumor	2863.19	1180	1.60373	1	1	Myeloid cell
CTGCTGTGTACATGTC_BRONCHO_58	Lung Tumor	3877.75	2947	1.31664	17	17	Epithelial
CTGCTGTTCTGGTGTA_BRONCHO_58	Lung Tumor	2680.71	840	1.30121	2	2	T lymphocyte
CTGGTCTAGGAGTAGA_BRONCHO_58	Lung Tumor	4174.07	3063	1.17134	1	1	Myeloid cell
CTGGTCTAGTGGACGT_BRONCHO_58	Lung Tumor	4194.72	3189	1.14688	7	7	Epithelial
CTGGTCTCACCGGAAA_BRONCHO_58	Lung Tumor	3365.21	1699	1.36695	5	5	NK cell
CTGGTCTCACTATCTT_BRONCHO_58	Lung Tumor	4324.76	2978	1.07161	1	1	Myeloid cell
CTGGTCTCAGGCAGTA_BRONCHO_58	Lung Tumor	4592.72	4948	0.910091	17	17	Epithelial
CTGGTCTGTCCAAGTT_BRONCHO_58	Lung Tumor	2535.79	844	1.40239	0	0	T lymphocyte
CTGGTCTGTTTCCACC_BRONCHO_58	Lung Tumor	2609.87	969	1.86299	0	0	T lymphocyte
CTGTGCTCACCATCCT_BRONCHO_58	Lung Tumor	4764.34	3313	0.971188	11	11	Fibroblast
CTGTGCTCACGAAATA_BRONCHO_58	Lung Tumor	4496.3	4655	1.18073	17	17	Epithelial
CTGTGCTCAGATGGCA_BRONCHO_58	Lung Tumor	3106.42	1539	1.46925	1	1	Myeloid cell
CTGTGCTTCAACTCTT_BRONCHO_58	Lung Tumor	2389.83	698	1.93664	2	2	T lymphocyte
CTGTTTAAGATCACGG_BRONCHO_58	Lung Tumor	2730.47	922	1.40339	0	0	T lymphocyte
CTGTTTACAACGCACC_BRONCHO_58	Lung Tumor	2503.83	766	1.65816	2	2	T lymphocyte
CTGTTTACAGCGTAAG_BRONCHO_58	Lung Tumor	3501.98	1495	1.17222	2	2	T lymphocyte
CTGTTTAGTCGAGTTT_BRONCHO_58	Lung Tumor	2964.54	1183	1.79007	1	1	Myeloid cell
CTGTTTAGTCGGCTCA_BRONCHO_58	Lung Tumor	2298.25	723	2.48406	0	0	T lymphocyte
CTGTTTATCTGCGACG_BRONCHO_58	Lung Tumor	2673.08	848	1.60813	0	0	T lymphocyte
CTTAACTAGAAGGACA_BRONCHO_58	Lung Tumor	4256.09	2772	1.24269	1	1	Myeloid cell
CTTAACTAGACCTAGG_BRONCHO_58	Lung Tumor	3824.58	2051	1.60568	1	1	Myeloid cell
CTTAACTAGCATGGCA_BRONCHO_58	Lung Tumor	4009.1	1965	0.854354	2	2	T lymphocyte
CTTAACTAGGTGTTAA_BRONCHO_58	Lung Tumor	4534.1	2874	1.03747	2	2	T lymphocyte
CTTAACTCAACAACCT_BRONCHO_58	Lung Tumor	2441	828	2.30735	4	4	B lymphocyte
CTTAACTCAGCTGCAC_BRONCHO_58	Lung Tumor	4432.53	2667	1.04174	11	11	Fibroblast
CTTAACTCATACAGCT_BRONCHO_58	Lung Tumor	637.426	219	1.54043	13	13	B lymphocyte
CTTAACTGTAATCGTC_BRONCHO_58	Lung Tumor	3432.8	1320	1.35659	0	0	T lymphocyte
CTTAACTTCCCGGATG_BRONCHO_58	Lung Tumor	3109.95	1169	1.48301	0	0	T lymphocyte
CTTAACTTCCGCATCT_BRONCHO_58	Lung Tumor	4038.94	4084	1.28899	17	17	Epithelial
CTTACCGAGATATACG_BRONCHO_58	Lung Tumor	2602.83	900	1.84491	0	0	T lymphocyte
CTTACCGCAGACGCTC_BRONCHO_58	Lung Tumor	3149.42	1131	1.85603	1	1	Myeloid cell
CTTACCGCAGCTGGCT_BRONCHO_58	Lung Tumor	2170.92	786	2.22509	0	0	T lymphocyte
CTTAGGAAGATGCCAG_BRONCHO_58	Lung Tumor	3386.21	1329	1.39336	2	2	T lymphocyte
CTTAGGAAGCCGCCTA_BRONCHO_58	Lung Tumor	2650.25	947	1.6808	5	5	NK cell
CTTAGGAGTAGCGTGA_BRONCHO_58	Lung Tumor	2041.14	591	2.5609	4	4	B lymphocyte
CTTAGGAGTGACCAAG_BRONCHO_58	Lung Tumor	1480.42	362	1.95851	14	14	T lymphocyte
CTTAGGAGTGGGTCAA_BRONCHO_58	Lung Tumor	1882.22	511	2.5856	4	4	B lymphocyte
CTTAGGATCACGAAGG_BRONCHO_58	Lung Tumor	3400.14	1701	1.50853	1	1	Myeloid cell
CTTAGGATCCCTCAGT_BRONCHO_58	Lung Tumor	2821.83	987	1.68649	2	2	T lymphocyte
CTTCTCTCAATCACAC_BRONCHO_58	Lung Tumor	4604.08	5230	1.13191	17	17	Epithelial
CTTCTCTCATCAGTAC_BRONCHO_58	Lung Tumor	2533.69	940	1.9835	0	0	T lymphocyte
CTTCTCTCATGGTAGG_BRONCHO_58	Lung Tumor	2395.39	740	1.80138	2	2	T lymphocyte
CTTCTCTGTAGCACGA_BRONCHO_58	Lung Tumor	3883.86	1856	1.08755	0	0	T lymphocyte
CTTCTCTGTCATTAGC_BRONCHO_58	Lung Tumor	2768.36	882	1.78587	2	2	T lymphocyte
CTTCTCTGTGAAGGCT_BRONCHO_58	Lung Tumor	409.7	209	0.737797	20	20	Undetermined
CTTCTCTTCGAACTGT_BRONCHO_58	Lung Tumor	2594.71	881	1.93298	5	5	NK cell
CTTGGCTCAACTGGCC_BRONCHO_58	Lung Tumor	2375.08	671	2.11244	2	2	T lymphocyte
CTTGGCTGTGGCCCTA_BRONCHO_58	Lung Tumor	2846.17	955	1.29064	2	2	T lymphocyte
CTTGGCTGTTCGGGCT_BRONCHO_58	Lung Tumor	2436.62	775	1.76018	0	0	T lymphocyte
CTTTGCGAGACGCTTT_BRONCHO_58	Lung Tumor	2933.09	1005	1.42958	0	0	T lymphocyte
CTTTGCGGTAGGGTAC_BRONCHO_58	Lung Tumor	2584.13	926	1.8444	4	4	B lymphocyte
CTTTGCGGTATCTGCA_BRONCHO_58	Lung Tumor	2712.45	983	1.82166	0	0	T lymphocyte
CTTTGCGGTCCAACTA_BRONCHO_58	Lung Tumor	2576.04	811	1.54388	1	1	Myeloid cell
GAAACTCAGCTAAACA_BRONCHO_58	Lung Tumor	4218.87	3790	1.10187	17	17	Epithelial
GAAACTCCAAGCTGAG_BRONCHO_58	Lung Tumor	2566.77	799	1.79832	0	0	T lymphocyte
GAAACTCCATATGAGA_BRONCHO_58	Lung Tumor	3164.21	1394	1.31008	1	1	Myeloid cell
GAAACTCCATGACGGA_BRONCHO_58	Lung Tumor	2825.56	2257	1.60709	13	13	B lymphocyte
GAAACTCCATTTCACT_BRONCHO_58	Lung Tumor	3214.63	1226	1.66415	2	2	T lymphocyte
GAAACTCGTACCTACA_BRONCHO_58	Lung Tumor	2386.61	797	2.35811	0	0	T lymphocyte
GAAACTCGTCCGAATT_BRONCHO_58	Lung Tumor	2553.09	860	1.54679	0	0	T lymphocyte
GAAACTCGTGTCGCTG_BRONCHO_58	Lung Tumor	3617.97	2274	1.37209	1	1	Myeloid cell
GAAACTCTCATCGCTC_BRONCHO_58	Lung Tumor	4856.5	5818	0.92078	17	17	Epithelial
GAAACTCTCCGCATCT_BRONCHO_58	Lung Tumor	3276.81	1552	0.210568	8	8	Epithelial
GAAATGACACGGTAGA_BRONCHO_58	Lung Tumor	2614.26	811	1.79491	1	1	Myeloid cell
GAAATGAGTACCATCA_BRONCHO_58	Lung Tumor	2926.81	1154	1.76182	0	0	T lymphocyte
GAAATGATCGTGTAGT_BRONCHO_58	Lung Tumor	1764.4	443	3.43935	4	4	B lymphocyte
GAAATGATCTAGCACA_BRONCHO_58	Lung Tumor	2807.78	930	1.72801	2	2	T lymphocyte
GAAATGATCTCTTGAT_BRONCHO_58	Lung Tumor	3811.32	2913	0.849175	17	17	Epithelial
GAACATCAGCTATGCT_BRONCHO_58	Lung Tumor	2747.58	915	1.83849	2	2	T lymphocyte
GAACATCCAAAGAATC_BRONCHO_58	Lung Tumor	4638.5	3059	0.949641	11	11	Fibroblast
GAACATCCAAGCCATT_BRONCHO_58	Lung Tumor	2506.74	826	1.62318	2	2	T lymphocyte
GAACATCCACATCTTT_BRONCHO_58	Lung Tumor	3620.1	2222	0.519867	1	1	Myeloid cell
GAACATCCACCCTATC_BRONCHO_58	Lung Tumor	2310.4	683	0.120546	8	8	Epithelial
GAACATCCAGATGAGC_BRONCHO_58	Lung Tumor	2936.64	1017	1.80983	5	5	NK cell
GAACATCTCCGCGGTA_BRONCHO_58	Lung Tumor	2325.98	678	2.03709	2	2	T lymphocyte
GAACCTAAGCACCGTC_BRONCHO_58	Lung Tumor	2610.9	853	1.61025	5	5	NK cell
GAACCTAAGTAACCCT_BRONCHO_58	Lung Tumor	1619.76	1988	1.82529	13	13	B lymphocyte
GAACCTACAGGATCGA_BRONCHO_58	Lung Tumor	3101.62	1132	1.54131	2	2	T lymphocyte
GAACCTAGTATCTGCA_BRONCHO_58	Lung Tumor	3933.28	2415	1.31649	1	1	Myeloid cell
GAACCTAGTCGTGGCT_BRONCHO_58	Lung Tumor	2667.9	879	1.639	2	2	T lymphocyte
GAACCTAGTTCCACTC_BRONCHO_58	Lung Tumor	3197.41	1457	1.22283	0	0	T lymphocyte
GAACCTAGTTGGTTTG_BRONCHO_58	Lung Tumor	2698.73	919	1.41279	5	5	NK cell
GAACCTATCCGTCAAA_BRONCHO_58	Lung Tumor	2766.1	936	1.58278	2	2	T lymphocyte
GAACGGAAGTCAATAG_BRONCHO_58	Lung Tumor	3112.31	1156	1.0851	2	2	T lymphocyte
GAACGGAAGTGCAAGC_BRONCHO_58	Lung Tumor	2457.2	734	1.89461	2	2	T lymphocyte
GAACGGAGTGCACGAA_BRONCHO_58	Lung Tumor	3045.94	1173	1.59641	0	0	T lymphocyte
GAACGGATCTGGTTCC_BRONCHO_58	Lung Tumor	2615.79	888	1.84909	0	0	T lymphocyte
GAAGCAGAGAAACCGC_BRONCHO_58	Lung Tumor	4346.78	5800	1.03491	17	17	Epithelial
GAAGCAGAGCGACGTA_BRONCHO_58	Lung Tumor	3095.5	1441	1.51153	0	0	T lymphocyte
GAAGCAGCATTGGTAC_BRONCHO_58	Lung Tumor	2947.3	1094	1.53928	2	2	T lymphocyte
GAAGCAGGTTGTACAC_BRONCHO_58	Lung Tumor	2623.55	866	1.23439	0	0	T lymphocyte
GAAGCAGGTTTGACTG_BRONCHO_58	Lung Tumor	3061.11	1203	1.29556	0	0	T lymphocyte
GAAGCAGGTTTGGCGC_BRONCHO_58	Lung Tumor	2514.14	856	1.96359	0	0	T lymphocyte
GAAGCAGTCCGTTGCT_BRONCHO_58	Lung Tumor	2479.34	961	2.2116	0	0	T lymphocyte
GAAGCAGTCCTTGCCA_BRONCHO_58	Lung Tumor	3189.57	1127	1.18557	2	2	T lymphocyte
GAAGCAGTCGAGAACG_BRONCHO_58	Lung Tumor	2293.44	659	0.12087	8	8	Epithelial
GAATAAGAGAATGTGT_BRONCHO_58	Lung Tumor	2675.92	808	1.47201	2	2	T lymphocyte
GAATAAGAGGAGTAGA_BRONCHO_58	Lung Tumor	2630.89	925	2.05669	4	4	B lymphocyte
GAATAAGCACATTAGC_BRONCHO_58	Lung Tumor	4738.49	3052	0.895718	11	11	Fibroblast
GAATAAGGTACACCGC_BRONCHO_58	Lung Tumor	3416.53	1288	1.43186	0	0	T lymphocyte
GAATAAGTCTGGAGCC_BRONCHO_58	Lung Tumor	4289.67	5749	0.907599	17	17	Epithelial
GAATGAAAGGAGCGAG_BRONCHO_58	Lung Tumor	2913.12	1013	1.55661	5	5	NK cell
GAATGAACAGATAATG_BRONCHO_58	Lung Tumor	4351.97	3115	1.06756	1	1	Myeloid cell
GAATGAAGTAGAGGAA_BRONCHO_58	Lung Tumor	2834.51	976	1.37376	0	0	T lymphocyte
GACACGCAGATCACGG_BRONCHO_58	Lung Tumor	2792.65	1255	1.61354	0	0	T lymphocyte
GACACGCCACGTCTCT_BRONCHO_58	Lung Tumor	3294.59	1334	1.52707	0	0	T lymphocyte
GACACGCGTGACGCCT_BRONCHO_58	Lung Tumor	2377.1	741	2.09198	2	2	T lymphocyte
GACACGCTCCTCCTAG_BRONCHO_58	Lung Tumor	2665.76	856	1.59552	2	2	T lymphocyte
GACACGCTCGCTTAGA_BRONCHO_58	Lung Tumor	3783.3	2012	1.09767	9	9	MAST cell
GACAGAGAGGAGCGAG_BRONCHO_58	Lung Tumor	3043.93	1239	1.44661	2	2	T lymphocyte
GACAGAGAGGCATGTG_BRONCHO_58	Lung Tumor	3089.59	1170	1.25265	2	2	T lymphocyte
GACAGAGCAACGATCT_BRONCHO_58	Lung Tumor	2176.96	684	2.15563	2	2	T lymphocyte
GACAGAGTCCCTAATT_BRONCHO_58	Lung Tumor	4350.99	7969	0.931118	17	17	Epithelial
GACCAATAGCAGCGTA_BRONCHO_58	Lung Tumor	2976.89	1053	1.43125	0	0	T lymphocyte
GACCAATAGTTCGCGC_BRONCHO_58	Lung Tumor	2501.3	752	2.04969	2	2	T lymphocyte
GACCAATCAATCACAC_BRONCHO_58	Lung Tumor	4321.46	2631	1.00774	0	0	T lymphocyte
GACCAATCAGACAAAT_BRONCHO_58	Lung Tumor	1327.16	354	3.83151	8	8	Epithelial
GACCAATCAGGATCGA_BRONCHO_58	Lung Tumor	2533.9	994	1.88252	4	4	B lymphocyte
GACCAATCAGGTTTCA_BRONCHO_58	Lung Tumor	3233.41	1401	1.9295	1	1	Myeloid cell
GACCAATGTACGAAAT_BRONCHO_58	Lung Tumor	2903.38	1003	1.71813	0	0	T lymphocyte
GACCAATGTTCCACTC_BRONCHO_58	Lung Tumor	2767.08	1286	1.40983	0	0	T lymphocyte
GACCAATTCAGCCTAA_BRONCHO_58	Lung Tumor	1830.67	475	2.69014	2	2	T lymphocyte
GACCAATTCAGTTAGC_BRONCHO_58	Lung Tumor	3409.39	1400	1.20995	0	0	T lymphocyte
GACCAATTCATGGTCA_BRONCHO_58	Lung Tumor	2277.98	689	2.58504	0	0	T lymphocyte
GACCTGGCATCTCGCT_BRONCHO_58	Lung Tumor	2586.17	936	1.78197	5	5	NK cell
GACCTGGGTCATCCCT_BRONCHO_58	Lung Tumor	2200.16	738	2.49458	0	0	T lymphocyte
GACCTGGGTGGCCCTA_BRONCHO_58	Lung Tumor	4900.51	7109	1.0874	17	17	Epithelial
GACCTGGGTTCGTCTC_BRONCHO_58	Lung Tumor	2278.82	729	1.74063	4	4	B lymphocyte
GACCTGGTCGCCAAAT_BRONCHO_58	Lung Tumor	3513.61	3278	1.47382	17	17	Epithelial
GACGCGTCAAGCGAGT_BRONCHO_58	Lung Tumor	3969.66	1935	1.06127	2	2	T lymphocyte
GACGCGTCAGCGAACA_BRONCHO_58	Lung Tumor	2174.25	737	2.55167	0	0	T lymphocyte
GACGCGTGTCGACTAT_BRONCHO_58	Lung Tumor	2502.8	872	1.65677	9	9	MAST cell
GACGCGTGTGGTTTCA_BRONCHO_58	Lung Tumor	3141.04	1143	1.11905	0	0	T lymphocyte
GACGCGTTCAACCATG_BRONCHO_58	Lung Tumor	3448.56	1610	0.373713	10	10	Myeloid cell
GACGCGTTCACGCGGT_BRONCHO_58	Lung Tumor	2552.58	863	1.8505	5	5	NK cell
GACGGCTAGATGAGAG_BRONCHO_58	Lung Tumor	3160.37	1521	1.61479	1	1	Myeloid cell
GACGGCTAGTCGATAA_BRONCHO_58	Lung Tumor	4019.84	2863	1.21747	1	1	Myeloid cell
GACGGCTGTAGGGTAC_BRONCHO_58	Lung Tumor	2893.88	1003	1.21688	0	0	T lymphocyte
GACGGCTGTCATGCCG_BRONCHO_58	Lung Tumor	2787.17	921	1.5953	2	2	T lymphocyte
GACGGCTGTTGGTAAA_BRONCHO_58	Lung Tumor	2912.13	973	1.34579	2	2	T lymphocyte
GACGTGCAGTCTCGGC_BRONCHO_58	Lung Tumor	2086.49	542	1.11079	8	8	Epithelial
GACGTGCCACCAGATT_BRONCHO_58	Lung Tumor	3107.3	1476	1.55418	2	2	T lymphocyte
GACGTGCCATTAGCCA_BRONCHO_58	Lung Tumor	3639.96	1523	1.13108	2	2	T lymphocyte
GACGTGCTCACAGGCC_BRONCHO_58	Lung Tumor	3791.1	3385	0.90151	10	10	Myeloid cell
GACGTGCTCCGCGCAA_BRONCHO_58	Lung Tumor	2706.01	886	1.79841	1	1	Myeloid cell
GACGTTAAGAACTGTA_BRONCHO_58	Lung Tumor	2643.44	893	1.63967	5	5	NK cell
GACGTTAAGAAGCCCA_BRONCHO_58	Lung Tumor	2804.53	989	1.72001	5	5	NK cell
GACGTTATCGTATCAG_BRONCHO_58	Lung Tumor	3772.28	2399	1.71324	1	1	Myeloid cell
GACTAACAGCCTTGAT_BRONCHO_58	Lung Tumor	4075.92	2450	1.25986	11	11	Fibroblast
GACTAACAGGAGTAGA_BRONCHO_58	Lung Tumor	2332.96	865	1.86477	0	0	T lymphocyte
GACTAACCAGATTGCT_BRONCHO_58	Lung Tumor	2917.97	1174	1.37515	0	0	T lymphocyte
GACTAACCATACCATG_BRONCHO_58	Lung Tumor	2573.57	800	2.14661	5	5	NK cell
GACTAACTCGTCGTTC_BRONCHO_58	Lung Tumor	2751.82	1006	1.88274	4	4	B lymphocyte
GACTAACTCGTGGACC_BRONCHO_58	Lung Tumor	4356.62	4260	1.06134	17	17	Epithelial
GACTAACTCTTCGGTC_BRONCHO_58	Lung Tumor	2624.62	973	1.71743	0	0	T lymphocyte
GACTACAAGACGCTTT_BRONCHO_58	Lung Tumor	2535.71	763	1.60841	2	2	T lymphocyte
GACTACACAATCCGAT_BRONCHO_58	Lung Tumor	3499.15	1572	2.09298	1	1	Myeloid cell
GACTACAGTCAGAAGC_BRONCHO_58	Lung Tumor	4895.17	3713	1.02082	11	11	Fibroblast
GACTACAGTCTAAACC_BRONCHO_58	Lung Tumor	2462.6	777	1.92465	2	2	T lymphocyte
GACTACAGTGCAACTT_BRONCHO_58	Lung Tumor	2637.84	991	1.80627	2	2	T lymphocyte
GACTACATCCCTCTTT_BRONCHO_58	Lung Tumor	2653.45	893	1.7561	2	2	T lymphocyte
GACTACATCGGTCCGA_BRONCHO_58	Lung Tumor	3145.27	1298	1.99183	1	1	Myeloid cell
GACTGCGAGGGTCGAT_BRONCHO_58	Lung Tumor	2375.33	719	1.95155	0	0	T lymphocyte
GACTGCGCAACTGCGC_BRONCHO_58	Lung Tumor	2356.85	702	1.67846	2	2	T lymphocyte
GACTGCGGTGTGCCTG_BRONCHO_58	Lung Tumor	2695.59	892	1.66108	2	2	T lymphocyte
GACTGCGTCCGCGCAA_BRONCHO_58	Lung Tumor	3944.13	2919	1.36355	17	17	Epithelial
GAGCAGAAGTTACCCA_BRONCHO_58	Lung Tumor	2891.36	1088	1.76792	5	5	NK cell
GAGCAGACAAATTGCC_BRONCHO_58	Lung Tumor	2956.98	1172	1.59905	1	1	Myeloid cell
GAGCAGAGTAAATGTG_BRONCHO_58	Lung Tumor	2910.3	955	1.92616	2	2	T lymphocyte
GAGCAGAGTAGGAGTC_BRONCHO_58	Lung Tumor	2950.6	1085	1.52209	0	0	T lymphocyte
GAGCAGAGTCTCCACT_BRONCHO_58	Lung Tumor	2408.5	679	0.789335	0	0	T lymphocyte
GAGCAGAGTCTCGTTC_BRONCHO_58	Lung Tumor	2810.2	1001	1.44185	5	5	NK cell
GAGCAGATCACCGTAA_BRONCHO_58	Lung Tumor	2355.56	768	1.81109	4	4	B lymphocyte
GAGCAGATCCAATGGT_BRONCHO_58	Lung Tumor	4105.13	2608	1.14493	11	11	Fibroblast
GAGCAGATCGTACCGG_BRONCHO_58	Lung Tumor	3625.23	3614	1.41812	17	17	Epithelial
GAGGTGACAAGACGTG_BRONCHO_58	Lung Tumor	3459.66	1346	2.05193	0	0	T lymphocyte
GAGGTGACATCGGAAG_BRONCHO_58	Lung Tumor	3174.18	1393	1.69872	1	1	Myeloid cell
GAGGTGACATGCTGGC_BRONCHO_58	Lung Tumor	2706.91	910	1.47394	0	0	T lymphocyte
GAGGTGAGTCCGTTAA_BRONCHO_58	Lung Tumor	2574.3	758	1.99248	2	2	T lymphocyte
GAGGTGATCAGTGCAT_BRONCHO_58	Lung Tumor	3532.92	1349	1.41421	0	0	T lymphocyte
GAGGTGATCCCGGATG_BRONCHO_58	Lung Tumor	2075.63	654	2.13356	4	4	B lymphocyte
GAGGTGATCGCATGGC_BRONCHO_58	Lung Tumor	1931.97	522	2.33706	4	4	B lymphocyte
GAGTCCGAGAGCTGCA_BRONCHO_58	Lung Tumor	2272.73	658	2.14812	2	2	T lymphocyte
GAGTCCGAGCACCGTC_BRONCHO_58	Lung Tumor	3978.38	3198	1.31847	17	17	Epithelial
GAGTCCGAGTCAAGCG_BRONCHO_58	Lung Tumor	2659.99	929	1.53945	1	1	Myeloid cell
GAGTCCGAGTTTAGGA_BRONCHO_58	Lung Tumor	4407.36	4566	1.1721	17	17	Epithelial
GAGTCCGCAGATAATG_BRONCHO_58	Lung Tumor	3012.51	1107	0.253462	8	8	Epithelial
GAGTCCGCATGCAATC_BRONCHO_58	Lung Tumor	3714.42	1483	1.10363	11	11	Fibroblast
GAGTCCGTCGCAAACT_BRONCHO_58	Lung Tumor	3280.92	1262	1.19483	2	2	T lymphocyte
GATCAGTAGGATTCGG_BRONCHO_58	Lung Tumor	2903.01	1121	1.21517	2	2	T lymphocyte
GATCAGTAGGGTCGAT_BRONCHO_58	Lung Tumor	2963.64	1045	1.48312	2	2	T lymphocyte
GATCAGTAGTGCGTGA_BRONCHO_58	Lung Tumor	2798.5	913	1.44656	0	0	T lymphocyte
GATCAGTCACCAGTTA_BRONCHO_58	Lung Tumor	3783.75	2995	1.35409	17	17	Epithelial
GATCAGTCACGGTGTC_BRONCHO_58	Lung Tumor	2569.75	852	2.16701	5	5	NK cell
GATCAGTCAGATGGCA_BRONCHO_58	Lung Tumor	2088.11	595	2.72057	5	5	NK cell
GATCAGTCATCTCCCA_BRONCHO_58	Lung Tumor	2963.79	1116	1.4823	0	0	T lymphocyte
GATCAGTGTCGAAAGC_BRONCHO_58	Lung Tumor	2145.17	680	2.06597	0	0	T lymphocyte
GATCAGTTCGTTACGA_BRONCHO_58	Lung Tumor	3837.99	1727	1.09653	11	11	Fibroblast
GATCAGTTCTAAGCCA_BRONCHO_58	Lung Tumor	3071.08	1094	1.21897	2	2	T lymphocyte
GATCGATAGAAACGCC_BRONCHO_58	Lung Tumor	2319.08	726	2.42053	1	1	Myeloid cell
GATCGATAGCTATGCT_BRONCHO_58	Lung Tumor	3148.76	1448	1.46307	1	1	Myeloid cell
GATCGATCAGGATTGG_BRONCHO_58	Lung Tumor	2380.69	693	0.417473	8	8	Epithelial
GATCGCGAGCAAATCA_BRONCHO_58	Lung Tumor	2482.74	884	2.09824	4	4	B lymphocyte
GATCGCGAGCCAGTTT_BRONCHO_58	Lung Tumor	2898.11	999	0.273297	10	10	Myeloid cell
GATCGCGCACAAGACG_BRONCHO_58	Lung Tumor	2922.81	1039	1.71578	0	0	T lymphocyte
GATCGCGCACCGCTAG_BRONCHO_58	Lung Tumor	1908.31	502	0.333087	14	14	T lymphocyte
GATCGCGCACTGTCGG_BRONCHO_58	Lung Tumor	2654.15	1064	1.76538	0	0	T lymphocyte
GATCGCGCATGACGGA_BRONCHO_58	Lung Tumor	2876.25	1018	1.68172	5	5	NK cell
GATCGCGGTACCTACA_BRONCHO_58	Lung Tumor	3940.28	3148	1.24739	17	17	Epithelial
GATCGCGGTCGCCATG_BRONCHO_58	Lung Tumor	4729.43	7639	0.841475	17	17	Epithelial
GATCGCGTCAATCTCT_BRONCHO_58	Lung Tumor	4154.37	3748	0.919664	17	17	Epithelial
GATCGCGTCCTCATTA_BRONCHO_58	Lung Tumor	4467.82	5129	1.06177	17	17	Epithelial
GATCGCGTCTCAAGTG_BRONCHO_58	Lung Tumor	2841.16	1236	1.60621	0	0	T lymphocyte
GATCGTAAGTGAACGC_BRONCHO_58	Lung Tumor	3869.22	2259	1.22132	1	1	Myeloid cell
GATCGTACACAGGCCT_BRONCHO_58	Lung Tumor	3986.41	2918	1.01352	1	1	Myeloid cell
GATCGTACAGGGCATA_BRONCHO_58	Lung Tumor	2579.55	769	1.98971	2	2	T lymphocyte
GATCGTAGTCGCGAAA_BRONCHO_58	Lung Tumor	2839.85	964	1.11845	0	0	T lymphocyte
GATCGTAGTTCCAACA_BRONCHO_58	Lung Tumor	3602.42	1481	1.20154	2	2	T lymphocyte
GATCTAGAGAGACTAT_BRONCHO_58	Lung Tumor	2514.3	795	1.90258	1	1	Myeloid cell
GATCTAGAGTTACCCA_BRONCHO_58	Lung Tumor	3298.04	1514	1.53327	1	1	Myeloid cell
GATCTAGCAAGCCATT_BRONCHO_58	Lung Tumor	2763.87	1127	1.6234	0	0	T lymphocyte
GATCTAGCAGTATAAG_BRONCHO_58	Lung Tumor	3831.17	1823	1.70297	1	1	Myeloid cell
GATCTAGTCCTGTACC_BRONCHO_58	Lung Tumor	3923.11	1717	0.967579	2	2	T lymphocyte
GATCTAGTCGTTGACA_BRONCHO_58	Lung Tumor	2532.6	830	0.322066	8	8	Epithelial
GATGAAACAGCCTGTG_BRONCHO_58	Lung Tumor	2342.28	725	1.28476	0	0	T lymphocyte
GATGAAACATGTAGTC_BRONCHO_58	Lung Tumor	3095.37	1413	1.81756	9	9	MAST cell
GATGAGGAGAACTGTA_BRONCHO_58	Lung Tumor	2935.11	1019	1.34313	0	0	T lymphocyte
GATGAGGAGACAAGCC_BRONCHO_58	Lung Tumor	2439.8	945	2.12537	4	4	B lymphocyte
GATGAGGAGCGTCAAG_BRONCHO_58	Lung Tumor	2479.59	913	1.75041	0	0	T lymphocyte
GATGAGGCAAGTTGTC_BRONCHO_58	Lung Tumor	4274.77	4295	1.16616	17	17	Epithelial
GATGAGGGTGATAAGT_BRONCHO_58	Lung Tumor	2807.34	993	1.55152	1	1	Myeloid cell
GATGCTATCAACACCA_BRONCHO_58	Lung Tumor	2184.62	758	2.11964	4	4	B lymphocyte
GATGCTATCAGCAACT_BRONCHO_58	Lung Tumor	2517.36	759	2.26365	2	2	T lymphocyte
GATTCAGAGCCGGTAA_BRONCHO_58	Lung Tumor	4326.61	3253	1.21127	1	1	Myeloid cell
GATTCAGAGTTGAGAT_BRONCHO_58	Lung Tumor	2324.42	645	0.138493	14	14	T lymphocyte
GATTCAGCAAGCGCTC_BRONCHO_58	Lung Tumor	4065.2	4328	1.13063	17	17	Epithelial
GATTCAGGTCAAAGCG_BRONCHO_58	Lung Tumor	2383.94	716	2.42834	0	0	T lymphocyte
GATTCAGGTTACGCGC_BRONCHO_58	Lung Tumor	2800.03	1012	1.60671	0	0	T lymphocyte
GCAAACTAGATATGGT_BRONCHO_58	Lung Tumor	2476.62	764	1.4976	0	0	T lymphocyte
GCAAACTCACAGACAG_BRONCHO_58	Lung Tumor	2996.01	1075	1.554	2	2	T lymphocyte
GCAAACTCAGATCTGT_BRONCHO_58	Lung Tumor	4278.37	2668	1.17957	0	0	T lymphocyte
GCAAACTGTGACGCCT_BRONCHO_58	Lung Tumor	2997.79	1194	1.69411	1	1	Myeloid cell
GCAATCAAGGGCTTCC_BRONCHO_58	Lung Tumor	4552.85	3234	1.19073	1	1	Myeloid cell
GCAATCAGTCAACTGT_BRONCHO_58	Lung Tumor	4941.24	5979	0.953623	17	17	Epithelial
GCAATCAGTTCCACGG_BRONCHO_58	Lung Tumor	3810.75	3808	1.36053	17	17	Epithelial
GCAATCATCTTCAACT_BRONCHO_58	Lung Tumor	2543.43	818	1.69565	2	2	T lymphocyte
GCACATACACGAAACG_BRONCHO_58	Lung Tumor	2662.16	887	1.92599	2	2	T lymphocyte
GCACATAGTGGCCCTA_BRONCHO_58	Lung Tumor	4228.34	2364	1.12865	16	16	Endothelial
GCACTCTAGAGGTTAT_BRONCHO_58	Lung Tumor	2389.56	682	0.415565	10	10	Myeloid cell
GCACTCTAGCACAGGT_BRONCHO_58	Lung Tumor	2000.65	550	3.22972	5	5	NK cell
GCACTCTCAGTAAGCG_BRONCHO_58	Lung Tumor	2307.38	709	2.74321	2	2	T lymphocyte
GCAGCCAAGCAGCCTC_BRONCHO_58	Lung Tumor	3055.06	1126	1.48175	0	0	T lymphocyte
GCAGCCAAGCAGCGTA_BRONCHO_58	Lung Tumor	2051.62	535	2.1808	0	0	T lymphocyte
GCAGCCAAGCTGCAAG_BRONCHO_58	Lung Tumor	4028.07	3512	1.47007	1	1	Myeloid cell
GCAGCCAAGTGGGTTG_BRONCHO_58	Lung Tumor	2655.81	840	0	14	14	T lymphocyte
GCAGCCACACAGACAG_BRONCHO_58	Lung Tumor	4252.13	3541	1.21501	1	1	Myeloid cell
GCAGCCACAGGAATGC_BRONCHO_58	Lung Tumor	3821.25	2072	0.884347	9	9	MAST cell
GCAGCCACATCTACGA_BRONCHO_58	Lung Tumor	4532.56	5757	1.33187	17	17	Epithelial
GCAGCCAGTCCGTTAA_BRONCHO_58	Lung Tumor	2427.15	872	2.00702	4	4	B lymphocyte
GCAGTTAAGTTCCACA_BRONCHO_58	Lung Tumor	2216.09	651	2.39841	0	0	T lymphocyte
GCAGTTACATTCACTT_BRONCHO_58	Lung Tumor	2071.55	556	0.998334	8	8	Epithelial
GCAGTTATCTGATTCT_BRONCHO_58	Lung Tumor	2551.61	867	1.69623	4	4	B lymphocyte
GCATACAAGACCGGAT_BRONCHO_58	Lung Tumor	2436	859	1.73811	1	1	Myeloid cell
GCATACACACGGCGTT_BRONCHO_58	Lung Tumor	4446.9	5431	1.20699	17	17	Epithelial
GCATACACATGTTCCC_BRONCHO_58	Lung Tumor	2583.19	1001	0.972871	1	1	Myeloid cell
GCATACAGTGACGGTA_BRONCHO_58	Lung Tumor	2412.06	687	1.3268	17	17	Epithelial
GCATGATAGCCTCGTG_BRONCHO_58	Lung Tumor	3844.42	2497	1.19158	1	1	Myeloid cell
GCATGATAGCTTATCG_BRONCHO_58	Lung Tumor	2761.39	914	1.81745	0	0	T lymphocyte
GCATGATAGGTGATAT_BRONCHO_58	Lung Tumor	4511.74	7755	0.998917	17	17	Epithelial
GCATGATCATGCTGGC_BRONCHO_58	Lung Tumor	3255.08	1376	1.21272	0	0	T lymphocyte
GCATGATGTAGGCTGA_BRONCHO_58	Lung Tumor	3283.9	1419	1.7191	2	2	T lymphocyte
GCATGATGTCCGCTGA_BRONCHO_58	Lung Tumor	4552.02	4370	1.22905	17	17	Epithelial
GCATGCGAGAGGTACC_BRONCHO_58	Lung Tumor	2790.79	965	1.44502	5	5	NK cell
GCATGCGAGTTACCCA_BRONCHO_58	Lung Tumor	4491.55	4341	1.04139	17	17	Epithelial
GCATGCGCAAAGCGGT_BRONCHO_58	Lung Tumor	2677.88	902	1.94148	5	5	NK cell
GCATGCGCAAGTCATC_BRONCHO_58	Lung Tumor	4462.29	6758	1.1532	17	17	Epithelial
GCATGCGCAGGGTATG_BRONCHO_58	Lung Tumor	1797.55	467	3.3745	1	1	Myeloid cell
GCATGCGGTCTAGCGC_BRONCHO_58	Lung Tumor	3586.34	1628	1.44275	2	2	T lymphocyte
GCATGCGTCGTTACGA_BRONCHO_58	Lung Tumor	3479.13	1851	1.11555	9	9	MAST cell
GCATGTAAGTAGGCCA_BRONCHO_58	Lung Tumor	3681.15	2191	1.21999	1	1	Myeloid cell
GCATGTACAGCTGCAC_BRONCHO_58	Lung Tumor	2981.81	1048	1.6515	5	5	NK cell
GCATGTACATGAAGTA_BRONCHO_58	Lung Tumor	4186.64	2837	1.17485	1	1	Myeloid cell
GCATGTAGTCACTTCC_BRONCHO_58	Lung Tumor	4042.03	3427	1.2565	17	17	Epithelial
GCATGTATCCACGAAT_BRONCHO_58	Lung Tumor	4092.11	5279	1.12946	17	17	Epithelial
GCATGTATCGTAGGAG_BRONCHO_58	Lung Tumor	2990.24	1113	1.63982	0	0	T lymphocyte
GCATGTATCTGATTCT_BRONCHO_58	Lung Tumor	2662.65	964	2.1628	9	9	MAST cell
GCCAAATAGATGCCAG_BRONCHO_58	Lung Tumor	2086.01	598	2.84229	0	0	T lymphocyte
GCCAAATCAGCGTAAG_BRONCHO_58	Lung Tumor	2691.17	896	1.90873	2	2	T lymphocyte
GCCAAATGTGATGCCC_BRONCHO_58	Lung Tumor	4330.26	7068	1.16957	17	17	Epithelial
GCCTCTAAGAAACGAG_BRONCHO_58	Lung Tumor	2940.89	1003	0.964902	2	2	T lymphocyte
GCCTCTAAGGACACCA_BRONCHO_58	Lung Tumor	3890.69	2061	1.00465	1	1	Myeloid cell
GCCTCTACAATAGAGT_BRONCHO_58	Lung Tumor	2722.81	975	1.71479	5	5	NK cell
GCCTCTACATATACCG_BRONCHO_58	Lung Tumor	4158.83	2947	1.68917	17	17	Epithelial
GCCTCTAGTGATAAGT_BRONCHO_58	Lung Tumor	4676.09	6364	1.12991	17	17	Epithelial
GCCTCTAGTGTCCTCT_BRONCHO_58	Lung Tumor	2775.11	936	1.77485	0	0	T lymphocyte
GCGACCAAGAATCTCC_BRONCHO_58	Lung Tumor	3056.16	1223	1.97093	1	1	Myeloid cell
GCGACCAAGATAGTCA_BRONCHO_58	Lung Tumor	3903.99	3479	1.33833	1	1	Myeloid cell
GCGACCAAGATCTGCT_BRONCHO_58	Lung Tumor	2759.56	990	1.6816	0	0	T lymphocyte
GCGACCACAGGTCTCG_BRONCHO_58	Lung Tumor	3447.63	1534	1.32214	2	2	T lymphocyte
GCGACCACATGCAACT_BRONCHO_58	Lung Tumor	4624.6	4038	1.1523	17	17	Epithelial
GCGACCAGTGTTTGTG_BRONCHO_58	Lung Tumor	2737.3	945	1.47148	0	0	T lymphocyte
GCGACCATCTCGTTTA_BRONCHO_58	Lung Tumor	2607.69	802	1.20149	5	5	NK cell
GCGAGAACATGCAACT_BRONCHO_58	Lung Tumor	4257.6	4060	1.27108	17	17	Epithelial
GCGAGAAGTGCGCTTG_BRONCHO_58	Lung Tumor	3104.13	1068	1.32648	2	2	T lymphocyte
GCGAGAATCGACAGCC_BRONCHO_58	Lung Tumor	4550.47	3977	1.08734	1	1	Myeloid cell
GCGAGAATCTCACATT_BRONCHO_58	Lung Tumor	3010.08	1065	1.18127	1	1	Myeloid cell
GCGCAACAGAGTACAT_BRONCHO_58	Lung Tumor	3915.26	2306	1.02895	9	9	MAST cell
GCGCAACGTAATTGGA_BRONCHO_58	Lung Tumor	1973.58	545	2.26888	4	4	B lymphocyte
GCGCAACGTCATGCAT_BRONCHO_58	Lung Tumor	1593.91	1806	2.27044	13	13	B lymphocyte
GCGCAACTCCTCTAGC_BRONCHO_58	Lung Tumor	2815.61	1009	1.6277	2	2	T lymphocyte
GCGCAACTCTGTGCAA_BRONCHO_58	Lung Tumor	4178.45	2390	1.24313	0	0	T lymphocyte
GCGCAGTAGACTAGGC_BRONCHO_58	Lung Tumor	4211.54	3951	1.4463	17	17	Epithelial
GCGCAGTAGTAATCCC_BRONCHO_58	Lung Tumor	2416.78	769	2.02881	0	0	T lymphocyte
GCGCAGTGTAAGAGAG_BRONCHO_58	Lung Tumor	4241.8	4652	1.4821	1	1	Myeloid cell
GCGCAGTGTCATACTG_BRONCHO_58	Lung Tumor	2389.83	929	1.05159	8	8	Epithelial
GCGCAGTGTTGCGTTA_BRONCHO_58	Lung Tumor	3147.27	1415	1.59427	9	9	MAST cell
GCGCAGTTCCCGACTT_BRONCHO_58	Lung Tumor	3356.47	1208	1.48212	5	5	NK cell
GCGCAGTTCTTTACGT_BRONCHO_58	Lung Tumor	3849.67	3031	1.25466	17	17	Epithelial
GCGCCAACACCATGTA_BRONCHO_58	Lung Tumor	3903.41	3406	1.52772	1	1	Myeloid cell
GCGCCAACACTAGTAC_BRONCHO_58	Lung Tumor	652.814	203	6.76236	13	13	B lymphocyte
GCGCCAACAGACAAAT_BRONCHO_58	Lung Tumor	3693.21	1904	1.41327	1	1	Myeloid cell
GCGCCAACATCTACGA_BRONCHO_58	Lung Tumor	2475.2	806	1.7381	2	2	T lymphocyte
GCGCCAAGTCAATACC_BRONCHO_58	Lung Tumor	2961.54	1107	1.60684	0	0	T lymphocyte
GCGCCAATCATTCACT_BRONCHO_58	Lung Tumor	2940.47	1256	1.23171	0	0	T lymphocyte
GCGCGATAGCCCAACC_BRONCHO_58	Lung Tumor	2233.06	616	0.909973	0	0	T lymphocyte
GCGCGATAGCCTCGTG_BRONCHO_58	Lung Tumor	2530.7	809	1.73228	2	2	T lymphocyte
GCGCGATAGTGGTAAT_BRONCHO_58	Lung Tumor	3407.85	1514	1.21155	9	9	MAST cell
GCGCGATGTAAGTGTA_BRONCHO_58	Lung Tumor	3682.68	2749	1.57239	17	17	Epithelial
GCGCGATTCACGAAGG_BRONCHO_58	Lung Tumor	2737.36	876	1.54348	0	0	T lymphocyte
GCGCGATTCGTAGGTT_BRONCHO_58	Lung Tumor	2790.78	976	1.55405	0	0	T lymphocyte
GCGGGTTAGATGTTAG_BRONCHO_58	Lung Tumor	2063.43	549	0.31017	8	8	Epithelial
GCGGGTTAGCGCCTCA_BRONCHO_58	Lung Tumor	3780.67	2867	0.905995	17	17	Epithelial
GCGGGTTAGGCCCTTG_BRONCHO_58	Lung Tumor	2589.1	848	1.59273	1	1	Myeloid cell
GCGGGTTCAAGTAATG_BRONCHO_58	Lung Tumor	2331.36	671	2.05671	2	2	T lymphocyte
GCGGGTTCACTAAGTC_BRONCHO_58	Lung Tumor	2073.83	562	2.00086	2	2	T lymphocyte
GCGGGTTCAGGCGATA_BRONCHO_58	Lung Tumor	3335.01	1236	1.48965	0	0	T lymphocyte
GCGGGTTTCCAAACAC_BRONCHO_58	Lung Tumor	4568.08	6282	1.11659	17	17	Epithelial
GCGGGTTTCTCGCTTG_BRONCHO_58	Lung Tumor	2842.29	1139	1.63057	1	1	Myeloid cell
GCTCCTAGTCTTGATG_BRONCHO_58	Lung Tumor	1698.28	453	3.38909	8	8	Epithelial
GCTCCTAGTTCGGGCT_BRONCHO_58	Lung Tumor	4104.77	3028	1.13591	16	16	Endothelial
GCTCCTATCAACGGCC_BRONCHO_58	Lung Tumor	2586.37	998	1.60967	0	0	T lymphocyte
GCTCTGTAGAAACCGC_BRONCHO_58	Lung Tumor	4950.02	3964	0.89183	11	11	Fibroblast
GCTCTGTAGGTGCTAG_BRONCHO_58	Lung Tumor	3783.33	1941	1.38517	16	16	Endothelial
GCTCTGTCAAACTGCT_BRONCHO_58	Lung Tumor	3480.86	1436	1.31851	1	1	Myeloid cell
GCTCTGTCATCCTAGA_BRONCHO_58	Lung Tumor	4256.29	7124	0.916977	17	17	Epithelial
GCTCTGTGTAGTAGTA_BRONCHO_58	Lung Tumor	2861.66	973	1.71826	2	2	T lymphocyte
GCTCTGTTCAACACAC_BRONCHO_58	Lung Tumor	2121.37	1184	1.78172	13	13	B lymphocyte
GCTGCAGAGTACGATA_BRONCHO_58	Lung Tumor	4231.16	2954	1.21019	1	1	Myeloid cell
GCTGCAGAGTGTCTCA_BRONCHO_58	Lung Tumor	1466.08	411	4.30946	8	8	Epithelial
GCTGCAGCAATCGAAA_BRONCHO_58	Lung Tumor	2578.1	911	1.61107	0	0	T lymphocyte
GCTGCAGCACGGCTAC_BRONCHO_58	Lung Tumor	3823.33	3758	0.991306	10	10	Myeloid cell
GCTGCAGGTGTGCGTC_BRONCHO_58	Lung Tumor	4174.9	4191	1.48315	17	17	Epithelial
GCTGCAGGTTAGTGGG_BRONCHO_58	Lung Tumor	1522.08	1976	2.2102	13	13	B lymphocyte
GCTGCAGGTTTGTGTG_BRONCHO_58	Lung Tumor	3959.67	4321	1.2446	17	17	Epithelial
GCTGCGAAGAAACCGC_BRONCHO_58	Lung Tumor	4602.57	6973	1.12086	17	17	Epithelial
GCTGCGAAGCGATGAC_BRONCHO_58	Lung Tumor	4240.23	4341	1.18844	17	17	Epithelial
GCTGCGAAGGCTAGGT_BRONCHO_58	Lung Tumor	4324.92	3587	1.32801	1	1	Myeloid cell
GCTGCGAGTCAAAGAT_BRONCHO_58	Lung Tumor	4174.86	2874	1.07001	1	1	Myeloid cell
GCTGCTTAGACGCACA_BRONCHO_58	Lung Tumor	3008.77	1122	0.9949	0	0	T lymphocyte
GCTGCTTAGGAATCGC_BRONCHO_58	Lung Tumor	3325	1347	1.22894	0	0	T lymphocyte
GCTGCTTAGGCTAGCA_BRONCHO_58	Lung Tumor	2667.59	851	1.41806	2	2	T lymphocyte
GCTGCTTGTCTCGTTC_BRONCHO_58	Lung Tumor	3700.57	2148	1.30171	1	1	Myeloid cell
GCTGCTTTCCTCATTA_BRONCHO_58	Lung Tumor	3261.86	1725	1.46758	4	4	B lymphocyte
GCTGCTTTCGTTGCCT_BRONCHO_58	Lung Tumor	3089.41	1147	1.35408	0	0	T lymphocyte
GCTGCTTTCGTTTATC_BRONCHO_58	Lung Tumor	2060.24	539	0.159735	14	14	T lymphocyte
GCTGCTTTCTGCGGCA_BRONCHO_58	Lung Tumor	2695.49	887	1.63848	2	2	T lymphocyte
GCTGGGTAGATGAGAG_BRONCHO_58	Lung Tumor	1549.89	2213	2.02856	13	13	B lymphocyte
GCTGGGTAGTGAAGAG_BRONCHO_58	Lung Tumor	4423.81	3002	1.14203	11	11	Fibroblast
GCTGGGTCACGGCTAC_BRONCHO_58	Lung Tumor	2475.72	758	1.61413	2	2	T lymphocyte
GCTTCCAAGACGCAAC_BRONCHO_58	Lung Tumor	2948.22	1150	1.56488	2	2	T lymphocyte
GCTTCCACAGCTGCAC_BRONCHO_58	Lung Tumor	2284.58	800	1.94668	0	0	T lymphocyte
GCTTCCAGTCCATCCT_BRONCHO_58	Lung Tumor	2560.48	802	2.01368	5	5	NK cell
GCTTCCAGTGGGTCAA_BRONCHO_58	Lung Tumor	2380.11	753	1.8498	2	2	T lymphocyte
GCTTCCAGTTAGTGGG_BRONCHO_58	Lung Tumor	2924.55	1039	1.63902	2	2	T lymphocyte
GCTTCCAGTTTGTGTG_BRONCHO_58	Lung Tumor	3687.34	2673	1.52558	17	17	Epithelial
GCTTCCATCTCTAAGG_BRONCHO_58	Lung Tumor	2413.19	713	0.116293	8	8	Epithelial
GCTTCCATCTGAAAGA_BRONCHO_58	Lung Tumor	2802.6	1113	2.2204	1	1	Myeloid cell
GCTTGAAAGTACCGGA_BRONCHO_58	Lung Tumor	2448.72	804	2.14808	0	0	T lymphocyte
GCTTGAAAGTTAGCGG_BRONCHO_58	Lung Tumor	3349.06	1220	1.14937	2	2	T lymphocyte
GCTTGAAAGTTCGCGC_BRONCHO_58	Lung Tumor	2562.77	891	1.86964	2	2	T lymphocyte
GCTTGAACAGACGTAG_BRONCHO_58	Lung Tumor	3720.11	2466	1.62905	17	17	Epithelial
GCTTGAACAGCCAGAA_BRONCHO_58	Lung Tumor	4376.75	2770	0.951364	11	11	Fibroblast
GCTTGAACATAACCTG_BRONCHO_58	Lung Tumor	4937.2	4466	1.02516	1	1	Myeloid cell
GCTTGAACATGTTCCC_BRONCHO_58	Lung Tumor	2916.83	1175	1.31716	0	0	T lymphocyte
GCTTGAAGTATGAATG_BRONCHO_58	Lung Tumor	2455.24	759	1.46157	1	1	Myeloid cell
GCTTGAAGTGGGTATG_BRONCHO_58	Lung Tumor	2185.16	772	1.81865	4	4	B lymphocyte
GCTTGAAGTTCTCATT_BRONCHO_58	Lung Tumor	2696.02	876	1.85171	2	2	T lymphocyte
GGAAAGCAGCGAGAAA_BRONCHO_58	Lung Tumor	2820.22	999	1.50432	2	2	T lymphocyte
GGAAAGCAGTGCGATG_BRONCHO_58	Lung Tumor	5281.65	6260	1.14411	17	17	Epithelial
GGAAAGCCAAACTGTC_BRONCHO_58	Lung Tumor	2535.08	787	1.88253	0	0	T lymphocyte
GGAAAGCCATCGGGTC_BRONCHO_58	Lung Tumor	3688.32	1775	1.50927	1	1	Myeloid cell
GGAAAGCGTAATCGTC_BRONCHO_58	Lung Tumor	2593.04	901	1.81327	0	0	T lymphocyte
GGAAAGCGTCCTAGCG_BRONCHO_58	Lung Tumor	2380.9	709	1.89467	0	0	T lymphocyte
GGAAAGCGTGTGACCC_BRONCHO_58	Lung Tumor	2417.22	760	1.95232	1	1	Myeloid cell
GGAACTTGTAGGCATG_BRONCHO_58	Lung Tumor	2896.17	996	1.65614	5	5	NK cell
GGAACTTTCATGTCTT_BRONCHO_58	Lung Tumor	2377.31	813	2.2217	0	0	T lymphocyte
GGAACTTTCGCATGAT_BRONCHO_58	Lung Tumor	2619.66	932	1.9741	0	0	T lymphocyte
GGAACTTTCGTACCGG_BRONCHO_58	Lung Tumor	4147.38	3896	1.23693	17	17	Epithelial
GGAACTTTCGTCCAGG_BRONCHO_58	Lung Tumor	2332.8	769	1.63329	4	4	B lymphocyte
GGAACTTTCTTGACGA_BRONCHO_58	Lung Tumor	2568.59	986	1.65526	0	0	T lymphocyte
GGAACTTTCTTGTACT_BRONCHO_58	Lung Tumor	3206.86	1177	1.40016	0	0	T lymphocyte
GGAATAACACGAAAGC_BRONCHO_58	Lung Tumor	2889.14	987	1.4077	2	2	T lymphocyte
GGAATAACATGGAATA_BRONCHO_58	Lung Tumor	4695.07	7642	0.813216	17	17	Epithelial
GGAATAAGTGTGCGTC_BRONCHO_58	Lung Tumor	2876.2	977	1.35121	0	0	T lymphocyte
GGAATAATCTTCATGT_BRONCHO_58	Lung Tumor	3224.55	1191	1.1539	2	2	T lymphocyte
GGACAAGAGACACTAA_BRONCHO_58	Lung Tumor	3699.58	1906	0.257907	8	8	Epithelial
GGACAAGAGGTCGGAT_BRONCHO_58	Lung Tumor	3207.9	1332	1.38245	0	0	T lymphocyte
GGACAAGCACTGAAGG_BRONCHO_58	Lung Tumor	2990.44	1052	1.32743	0	0	T lymphocyte
GGACAAGTCCAATGGT_BRONCHO_58	Lung Tumor	2117.27	569	1.99183	2	2	T lymphocyte
GGACAAGTCGGAAATA_BRONCHO_58	Lung Tumor	2716.19	952	0.947257	11	11	Fibroblast
GGACAAGTCGTAGATC_BRONCHO_58	Lung Tumor	2826.49	1036	1.72977	5	5	NK cell
GGACAAGTCTAACTGG_BRONCHO_58	Lung Tumor	3795.97	4339	1.36517	17	17	Epithelial
GGACAAGTCTTCTGGC_BRONCHO_58	Lung Tumor	3025.69	1290	1.53115	0	0	T lymphocyte
GGACAGACACGCGAAA_BRONCHO_58	Lung Tumor	2611.57	801	1.80043	2	2	T lymphocyte
GGACAGAGTCCGAACC_BRONCHO_58	Lung Tumor	2243.31	658	2.09454	2	2	T lymphocyte
GGACAGAGTTACGTCA_BRONCHO_58	Lung Tumor	2351.92	866	2.11704	0	0	T lymphocyte
GGACAGATCCCATTTA_BRONCHO_58	Lung Tumor	2683.2	984	1.84617	5	5	NK cell
GGACATTCAAAGAATC_BRONCHO_58	Lung Tumor	4178.96	2481	1.07399	1	1	Myeloid cell
GGACATTCAAATCCGT_BRONCHO_58	Lung Tumor	1952.75	521	2.35779	5	5	NK cell
GGACATTCAAGGTGTG_BRONCHO_58	Lung Tumor	3094.74	1070	1.07285	0	0	T lymphocyte
GGACATTCAATACGCT_BRONCHO_58	Lung Tumor	2957.9	1112	1.35572	0	0	T lymphocyte
GGACATTCACATAACC_BRONCHO_58	Lung Tumor	3457.44	1365	1.15443	0	0	T lymphocyte
GGACATTGTCCGAATT_BRONCHO_58	Lung Tumor	2597.89	820	2.17596	2	2	T lymphocyte
GGACATTTCGCCTGAG_BRONCHO_58	Lung Tumor	2964.5	1026	1.57189	2	2	T lymphocyte
GGACGTCAGAGACGAA_BRONCHO_58	Lung Tumor	4515.62	3084	0.976617	11	11	Fibroblast
GGACGTCAGTCACGCC_BRONCHO_58	Lung Tumor	2876.81	1177	1.71306	1	1	Myeloid cell
GGACGTCCAGCCACCA_BRONCHO_58	Lung Tumor	3261.93	1315	2.2442	2	2	T lymphocyte
GGACGTCGTAGCGTAG_BRONCHO_58	Lung Tumor	2333.51	754	2.14775	2	2	T lymphocyte
GGACGTCGTGTGAATA_BRONCHO_58	Lung Tumor	4076.9	2784	1.24091	1	1	Myeloid cell
GGACGTCGTTCAGACT_BRONCHO_58	Lung Tumor	2456.89	822	1.29862	2	2	T lymphocyte
GGACGTCGTTCGTCTC_BRONCHO_58	Lung Tumor	2766.49	1078	1.78354	0	0	T lymphocyte
GGACGTCGTTGGTAAA_BRONCHO_58	Lung Tumor	2199.18	771	2.19305	4	4	B lymphocyte
GGACGTCTCTGGTATG_BRONCHO_58	Lung Tumor	2462.7	796	2.20244	8	8	Epithelial
GGAGCAAAGATGCCAG_BRONCHO_58	Lung Tumor	4351.43	4735	1.3008	17	17	Epithelial
GGAGCAAAGGGAGTAA_BRONCHO_58	Lung Tumor	2088.77	556	2.60577	2	2	T lymphocyte
GGAGCAACATGTAAGA_BRONCHO_58	Lung Tumor	4452.94	5566	1.2223	17	17	Epithelial
GGAGCAAGTAAGGGAA_BRONCHO_58	Lung Tumor	2596.46	835	1.80633	1	1	Myeloid cell
GGAGCAAGTGCATCTA_BRONCHO_58	Lung Tumor	2068.31	566	1.76157	0	0	T lymphocyte
GGAGCAAGTGGGTATG_BRONCHO_58	Lung Tumor	4665.36	6540	1.08369	17	17	Epithelial
GGAGCAAGTTAGATGA_BRONCHO_58	Lung Tumor	4090.8	2886	1.33246	1	1	Myeloid cell
GGAGCAATCACCATAG_BRONCHO_58	Lung Tumor	2950.23	997	1.47814	5	5	NK cell
GGAGCAATCGGCCGAT_BRONCHO_58	Lung Tumor	2753.69	908	1.4245	0	0	T lymphocyte
GGATGTTAGCGATAGC_BRONCHO_58	Lung Tumor	4255.05	2601	1.01708	11	11	Fibroblast
GGATGTTAGGCCATAG_BRONCHO_58	Lung Tumor	2559.61	1120	2.06435	0	0	T lymphocyte
GGATGTTCATCCGTGG_BRONCHO_58	Lung Tumor	2711.88	883	2.06332	0	0	T lymphocyte
GGATGTTGTCTGGTCG_BRONCHO_58	Lung Tumor	2696.94	858	1.81878	0	0	T lymphocyte
GGATGTTGTGCTCTTC_BRONCHO_58	Lung Tumor	3871.51	1984	1.37333	1	1	Myeloid cell
GGATGTTTCCGAAGAG_BRONCHO_58	Lung Tumor	3212.91	1217	1.52661	0	0	T lymphocyte
GGATGTTTCGCCTGAG_BRONCHO_58	Lung Tumor	2413.08	722	1.9396	0	0	T lymphocyte
GGATTACAGGCTCTTA_BRONCHO_58	Lung Tumor	2676.82	905	1.85717	5	5	NK cell
GGATTACAGTGAACAT_BRONCHO_58	Lung Tumor	3376.61	1687	2.18878	17	17	Epithelial
GGATTACAGTGTCCCG_BRONCHO_58	Lung Tumor	2023.63	679	0.934812	1	1	Myeloid cell
GGATTACCAAGCGATG_BRONCHO_58	Lung Tumor	2784.31	902	1.73769	0	0	T lymphocyte
GGATTACCAGATGAGC_BRONCHO_58	Lung Tumor	3841.91	5787	0.545887	17	17	Epithelial
GGATTACCAGCGAACA_BRONCHO_58	Lung Tumor	4449.21	6764	1.13925	17	17	Epithelial
GGATTACCATGCAACT_BRONCHO_58	Lung Tumor	2555.17	982	1.89618	4	4	B lymphocyte
GGATTACGTACTCAAC_BRONCHO_58	Lung Tumor	2163.11	710	2.04905	0	0	T lymphocyte
GGATTACTCAAAGTAG_BRONCHO_58	Lung Tumor	2884.51	952	1.73213	2	2	T lymphocyte
GGATTACTCAACCATG_BRONCHO_58	Lung Tumor	4028.22	3107	1.25691	17	17	Epithelial
GGCAATTAGATAGCAT_BRONCHO_58	Lung Tumor	1972.01	530	0	14	14	T lymphocyte
GGCAATTAGGATATAC_BRONCHO_58	Lung Tumor	2166.13	575	0.453121	8	8	Epithelial
GGCAATTGTACCGGCT_BRONCHO_58	Lung Tumor	2656.52	989	1.84785	0	0	T lymphocyte
GGCAATTGTTCCTCCA_BRONCHO_58	Lung Tumor	2621.47	879	1.66764	2	2	T lymphocyte
GGCAATTTCGCCTGTT_BRONCHO_58	Lung Tumor	2663.85	884	1.8568	5	5	NK cell
GGCCGATAGAGTGACC_BRONCHO_58	Lung Tumor	2426.48	718	1.42057	14	14	T lymphocyte
GGCCGATCAATACGCT_BRONCHO_58	Lung Tumor	2763.26	1320	1.77874	0	0	T lymphocyte
GGCCGATCACGAAATA_BRONCHO_58	Lung Tumor	2297.42	826	2.24354	4	4	B lymphocyte
GGCCGATTCGGCTACG_BRONCHO_58	Lung Tumor	2434.44	734	1.86212	2	2	T lymphocyte
GGCGACTAGAAGGCCT_BRONCHO_58	Lung Tumor	3225.57	1302	0.92555	0	0	T lymphocyte
GGCGACTGTACGAAAT_BRONCHO_58	Lung Tumor	2600.16	820	2.15479	2	2	T lymphocyte
GGCGACTTCACTTACT_BRONCHO_58	Lung Tumor	4337.69	3435	0.944572	17	17	Epithelial
GGCGTGTAGTGTACGG_BRONCHO_58	Lung Tumor	4053.71	2416	1.29813	1	1	Myeloid cell
GGCGTGTTCCAGAGGA_BRONCHO_58	Lung Tumor	2417.83	716	1.92442	5	5	NK cell
GGCTCGAAGCGGATCA_BRONCHO_58	Lung Tumor	2379.16	690	1.63519	2	2	T lymphocyte
GGCTCGAAGCGTGAAC_BRONCHO_58	Lung Tumor	1653.47	422	0.203872	10	10	Myeloid cell
GGCTCGAAGTCCGTAT_BRONCHO_58	Lung Tumor	2380.81	790	2.17913	0	0	T lymphocyte
GGCTCGACAGGAATGC_BRONCHO_58	Lung Tumor	4036.95	2171	1.23355	11	11	Fibroblast
GGCTCGACAGGTGCCT_BRONCHO_58	Lung Tumor	3734.9	1610	1.20752	2	2	T lymphocyte
GGCTCGACAGTACACT_BRONCHO_58	Lung Tumor	3333.29	1397	1.22823	0	0	T lymphocyte
GGCTCGACAGTCGATT_BRONCHO_58	Lung Tumor	2232.21	673	2.35035	0	0	T lymphocyte
GGCTCGATCTGTCCGT_BRONCHO_58	Lung Tumor	3148.92	1469	1.28796	9	9	MAST cell
GGCTGGTAGTAAGTAC_BRONCHO_58	Lung Tumor	3940.76	2680	1.47566	7	7	Epithelial
GGCTGGTAGTCGATAA_BRONCHO_58	Lung Tumor	2649.78	863	1.68147	2	2	T lymphocyte
GGCTGGTCAAGTTGTC_BRONCHO_58	Lung Tumor	1767.99	440	3.19547	1	1	Myeloid cell
GGCTGGTCACAGCGTC_BRONCHO_58	Lung Tumor	2782.07	930	1.38481	2	2	T lymphocyte
GGCTGGTCAGCTTCGG_BRONCHO_58	Lung Tumor	2430.02	757	1.47429	2	2	T lymphocyte
GGCTGGTGTTCAGCGC_BRONCHO_58	Lung Tumor	2392.94	811	2.32145	2	2	T lymphocyte
GGCTGGTTCACGCGGT_BRONCHO_58	Lung Tumor	2435.16	858	2.48136	1	1	Myeloid cell
GGGAATGCACAGGCCT_BRONCHO_58	Lung Tumor	2780.49	1029	1.63187	1	1	Myeloid cell
GGGAATGCATAAAGGT_BRONCHO_58	Lung Tumor	2332.08	655	1.71796	0	0	T lymphocyte
GGGAATGGTACACCGC_BRONCHO_58	Lung Tumor	3489.46	1396	1.25281	5	5	NK cell
GGGAATGGTATATGAG_BRONCHO_58	Lung Tumor	2411.37	709	1.79544	2	2	T lymphocyte
GGGAATGGTGCCTGTG_BRONCHO_58	Lung Tumor	3925.36	3932	1.71184	17	17	Epithelial
GGGAATGGTTCACCTC_BRONCHO_58	Lung Tumor	4184.45	3568	1.25257	1	1	Myeloid cell
GGGAATGTCTCATTCA_BRONCHO_58	Lung Tumor	3083.34	1122	0.309434	8	8	Epithelial
GGGACCTAGCACAGGT_BRONCHO_58	Lung Tumor	3923.94	3398	1.10983	1	1	Myeloid cell
GGGACCTCAACTGGCC_BRONCHO_58	Lung Tumor	1618.96	478	2.35027	8	8	Epithelial
GGGACCTGTTAAGGGC_BRONCHO_58	Lung Tumor	2937.82	1097	0.211853	1	1	Myeloid cell
GGGACCTGTTTAGGAA_BRONCHO_58	Lung Tumor	4175.02	5027	0.958561	17	17	Epithelial
GGGACCTTCTCAAGTG_BRONCHO_58	Lung Tumor	3213.79	2894	0.788297	17	17	Epithelial
GGGACCTTCTGCTTGC_BRONCHO_58	Lung Tumor	3087.11	1278	1.68866	1	1	Myeloid cell
GGGAGATAGGAACTGC_BRONCHO_58	Lung Tumor	4273.21	5548	1.02726	17	17	Epithelial
GGGAGATCAAGCCATT_BRONCHO_58	Lung Tumor	2519.06	940	1.86903	0	0	T lymphocyte
GGGAGATCAGCTATTG_BRONCHO_58	Lung Tumor	2364.45	702	2.56949	2	2	T lymphocyte
GGGAGATGTAAGTGGC_BRONCHO_58	Lung Tumor	2605.83	841	2.10367	2	2	T lymphocyte
GGGAGATTCAGGCCCA_BRONCHO_58	Lung Tumor	3071.15	1096	1.61296	0	0	T lymphocyte
GGGATGAAGACTTGAA_BRONCHO_58	Lung Tumor	2470.74	809	1.83525	5	5	NK cell
GGGATGAAGGGAAACA_BRONCHO_58	Lung Tumor	3244.94	1143	1.32174	0	0	T lymphocyte
GGGATGAGTCGCGGTT_BRONCHO_58	Lung Tumor	3830.83	1824	1.17697	2	2	T lymphocyte
GGGCACTAGCGTTGCC_BRONCHO_58	Lung Tumor	2365.07	731	2.07888	2	2	T lymphocyte
GGGCACTAGGAATGGA_BRONCHO_58	Lung Tumor	3117.97	1145	1.74951	2	2	T lymphocyte
GGGCACTAGGTGATTA_BRONCHO_58	Lung Tumor	2616.93	874	1.49303	2	2	T lymphocyte
GGGCACTAGTTACCCA_BRONCHO_58	Lung Tumor	2621.05	843	1.89315	5	5	NK cell
GGGCACTGTATCGCAT_BRONCHO_58	Lung Tumor	4503.51	4841	1.21502	17	17	Epithelial
GGGCACTGTGGTTTCA_BRONCHO_58	Lung Tumor	4437.85	2696	1.42204	1	1	Myeloid cell
GGGCACTTCTATCCCG_BRONCHO_58	Lung Tumor	1741.03	465	4.26131	10	10	Myeloid cell
GGGCACTTCTGCTTGC_BRONCHO_58	Lung Tumor	2218.98	814	1.74361	0	0	T lymphocyte
GGGCATCAGACACGAC_BRONCHO_58	Lung Tumor	4003.59	3438	1.42356	1	1	Myeloid cell
GGGCATCAGATAGTCA_BRONCHO_58	Lung Tumor	4742.15	3745	0.828636	11	11	Fibroblast
GGGCATCCACACCGAC_BRONCHO_58	Lung Tumor	3071.21	1250	1.42816	1	1	Myeloid cell
GGGCATCCACGCCAGT_BRONCHO_58	Lung Tumor	2366.7	797	2.01924	2	2	T lymphocyte
GGGCATCGTCCTCCAT_BRONCHO_58	Lung Tumor	3811.22	3651	0.969879	17	17	Epithelial
GGGCATCTCAACCATG_BRONCHO_58	Lung Tumor	2667.43	887	1.86194	2	2	T lymphocyte
GGGCATCTCCCAAGAT_BRONCHO_58	Lung Tumor	2224.14	684	2.06649	4	4	B lymphocyte
GGGTCTGAGCTGTCTA_BRONCHO_58	Lung Tumor	4343.71	2607	1.05913	11	11	Fibroblast
GGGTCTGAGGAATCGC_BRONCHO_58	Lung Tumor	4353.3	4126	1.25831	1	1	Myeloid cell
GGGTCTGCATCGACGC_BRONCHO_58	Lung Tumor	2510.3	768	2.21469	1	1	Myeloid cell
GGGTCTGTCAGTTTGG_BRONCHO_58	Lung Tumor	4371.22	3443	1.21779	1	1	Myeloid cell
GGGTCTGTCCTATGTT_BRONCHO_58	Lung Tumor	3118.12	1133	1.21805	0	0	T lymphocyte
GGGTCTGTCTTCAACT_BRONCHO_58	Lung Tumor	2572.78	845	1.76294	0	0	T lymphocyte
GGGTCTGTCTTGTACT_BRONCHO_58	Lung Tumor	4153.34	3701	1.36901	1	1	Myeloid cell
GGGTTGCAGGCAGTCA_BRONCHO_58	Lung Tumor	4904.65	7943	0.977307	17	17	Epithelial
GGGTTGCCAGGTTTCA_BRONCHO_58	Lung Tumor	2332.06	866	1.886	0	0	T lymphocyte
GGGTTGCCATGAAGTA_BRONCHO_58	Lung Tumor	3750.6	1815	1.3738	1	1	Myeloid cell
GGGTTGCGTACCAGTT_BRONCHO_58	Lung Tumor	4388.43	4383	1.16818	17	17	Epithelial
GGGTTGCGTTGATTCG_BRONCHO_58	Lung Tumor	3058.78	1086	1.32728	2	2	T lymphocyte
GGTATTGAGCCTCGTG_BRONCHO_58	Lung Tumor	2806.87	1003	0.96317	2	2	T lymphocyte
GGTATTGCACTCGACG_BRONCHO_58	Lung Tumor	3185.34	1244	1.4797	0	0	T lymphocyte
GGTATTGGTCCGAGTC_BRONCHO_58	Lung Tumor	3372.06	1311	1.502	0	0	T lymphocyte
GGTGAAGAGGACAGAA_BRONCHO_58	Lung Tumor	3771.81	2769	0.841002	17	17	Epithelial
GGTGAAGTCCCATTAT_BRONCHO_58	Lung Tumor	3009	1112	1.42575	0	0	T lymphocyte
GGTGAAGTCGCTAGCG_BRONCHO_58	Lung Tumor	2779.07	936	1.85935	2	2	T lymphocyte
GGTGCGTAGCGTAATA_BRONCHO_58	Lung Tumor	2380.59	733	1.82158	2	2	T lymphocyte
GGTGCGTCACGGTTTA_BRONCHO_58	Lung Tumor	3918.01	2390	1.39804	1	1	Myeloid cell
GGTGCGTCAGCTCGCA_BRONCHO_58	Lung Tumor	4450.87	5419	1.00506	17	17	Epithelial
GGTGCGTGTCACTTCC_BRONCHO_58	Lung Tumor	2581.16	817	2.32411	0	0	T lymphocyte
GGTGCGTTCCCATTAT_BRONCHO_58	Lung Tumor	2344.59	723	1.61407	2	2	T lymphocyte
GGTGCGTTCGCTGATA_BRONCHO_58	Lung Tumor	1672.62	534	2.93499	1	1	Myeloid cell
GGTGTTAAGGGAACGG_BRONCHO_58	Lung Tumor	2719.86	900	1.95324	2	2	T lymphocyte
GGTGTTAAGGGATCTG_BRONCHO_58	Lung Tumor	2715.16	1003	1.87819	2	2	T lymphocyte
GGTGTTAAGTACGTAA_BRONCHO_58	Lung Tumor	3804.79	3489	1.39762	17	17	Epithelial
GGTGTTATCAGCATGT_BRONCHO_58	Lung Tumor	2946.88	1024	1.42881	5	5	NK cell
GGTGTTATCTGAAAGA_BRONCHO_58	Lung Tumor	2815.47	963	1.91233	5	5	NK cell
GTAACGTAGATCGATA_BRONCHO_58	Lung Tumor	2778.72	923	1.37867	2	2	T lymphocyte
GTAACGTAGGAATCGC_BRONCHO_58	Lung Tumor	3869.25	1795	1.14255	2	2	T lymphocyte
GTAACGTAGGGCTTCC_BRONCHO_58	Lung Tumor	4339.6	2593	1.2095	2	2	T lymphocyte
GTAACGTCACGCATCG_BRONCHO_58	Lung Tumor	2773.56	948	1.76537	0	0	T lymphocyte
GTAACGTCATTTGCCC_BRONCHO_58	Lung Tumor	2743.52	1022	1.90311	9	9	MAST cell
GTAACGTTCAGGCAAG_BRONCHO_58	Lung Tumor	2373.78	751	2.13733	0	0	T lymphocyte
GTAACGTTCTGATACG_BRONCHO_58	Lung Tumor	2660.51	938	1.43343	0	0	T lymphocyte
GTAACTGAGAAGGGTA_BRONCHO_58	Lung Tumor	2697.77	862	1.42899	2	2	T lymphocyte
GTAACTGAGGCGTACA_BRONCHO_58	Lung Tumor	3051.77	1094	1.24533	0	0	T lymphocyte
GTAACTGCAGGCAGTA_BRONCHO_58	Lung Tumor	4222.96	2920	1.22697	1	1	Myeloid cell
GTAACTGCAGTTTACG_BRONCHO_58	Lung Tumor	4414.73	8256	1.01153	17	17	Epithelial
GTAACTGCATTCCTCG_BRONCHO_58	Lung Tumor	3721.13	1882	1.20849	9	9	MAST cell
GTAACTGGTGGCCCTA_BRONCHO_58	Lung Tumor	4232.66	3335	1.34855	1	1	Myeloid cell
GTAACTGTCCTAGAAC_BRONCHO_58	Lung Tumor	2052.1	560	2.93281	5	5	NK cell
GTACGTACAAAGTCAA_BRONCHO_58	Lung Tumor	2149.37	604	0.134362	8	8	Epithelial
GTACGTACAAGTTCTG_BRONCHO_58	Lung Tumor	2907.63	969	1.52146	2	2	T lymphocyte
GTACGTACAGCTGTGC_BRONCHO_58	Lung Tumor	4069.56	1900	1.06681	2	2	T lymphocyte
GTACGTACAGTAGAGC_BRONCHO_58	Lung Tumor	3963.45	2243	1.38683	1	1	Myeloid cell
GTACGTAGTCGCTTCT_BRONCHO_58	Lung Tumor	2797.02	991	1.62333	0	0	T lymphocyte
GTACGTATCTGAGGGA_BRONCHO_58	Lung Tumor	797.091	307	5.56134	13	13	B lymphocyte
GTACGTATCTTCTGGC_BRONCHO_58	Lung Tumor	2493.24	816	0.924036	8	8	Epithelial
GTACGTATCTTTCCTC_BRONCHO_58	Lung Tumor	688.87	283	0.925309	13	13	B lymphocyte
GTACTCCAGATAGCAT_BRONCHO_58	Lung Tumor	2355.29	753	2.16056	5	5	NK cell
GTACTCCCAAGCCTAT_BRONCHO_58	Lung Tumor	4797.43	3143	1.55228	19	19	Epithelial
GTACTCCCACACCGAC_BRONCHO_58	Lung Tumor	3978.82	2445	1.3042	1	1	Myeloid cell
GTACTCCGTCCGTCAG_BRONCHO_58	Lung Tumor	3939.09	3091	1.43788	17	17	Epithelial
GTACTCCGTGCCTGCA_BRONCHO_58	Lung Tumor	2963.56	1038	1.50366	5	5	NK cell
GTACTCCTCTTCTGGC_BRONCHO_58	Lung Tumor	2779.94	979	1.76845	2	2	T lymphocyte
GTACTTTAGGATTCGG_BRONCHO_58	Lung Tumor	2354.82	682	1.79203	2	2	T lymphocyte
GTACTTTCAAAGCAAT_BRONCHO_58	Lung Tumor	2548.51	778	0.516418	1	1	Myeloid cell
GTACTTTCAAGTCATC_BRONCHO_58	Lung Tumor	2748.62	982	1.72823	5	5	NK cell
GTACTTTTCCAAACAC_BRONCHO_58	Lung Tumor	2480.48	855	2.09978	0	0	T lymphocyte
GTACTTTTCGTCTGAA_BRONCHO_58	Lung Tumor	1780.54	453	3.42764	1	1	Myeloid cell
GTACTTTTCTATCGCC_BRONCHO_58	Lung Tumor	2718.97	1160	1.70941	0	0	T lymphocyte
GTACTTTTCTGTACGA_BRONCHO_58	Lung Tumor	2414.85	745	1.25153	9	9	MAST cell
GTAGGCCAGAAGGTTT_BRONCHO_58	Lung Tumor	2179.1	634	2.34133	2	2	T lymphocyte
GTAGGCCGTATCTGCA_BRONCHO_58	Lung Tumor	4744.72	5107	0.957623	17	17	Epithelial
GTAGGCCGTCAAAGCG_BRONCHO_58	Lung Tumor	4607.07	3181	1.03944	11	11	Fibroblast
GTAGTCAAGACTAGAT_BRONCHO_58	Lung Tumor	2215.64	645	2.12759	2	2	T lymphocyte
GTAGTCAAGTCGTACT_BRONCHO_58	Lung Tumor	2752.73	1056	1.44181	0	0	T lymphocyte
GTAGTCACAAATACAG_BRONCHO_58	Lung Tumor	2809.46	1089	1.53631	0	0	T lymphocyte
GTAGTCACACACATGT_BRONCHO_58	Lung Tumor	2017.07	596	2.42077	0	0	T lymphocyte
GTAGTCACAGATGAGC_BRONCHO_58	Lung Tumor	2559.35	784	2.09078	2	2	T lymphocyte
GTAGTCACAGGTGGAT_BRONCHO_58	Lung Tumor	4470.4	3627	1.20072	1	1	Myeloid cell
GTAGTCACAGTACACT_BRONCHO_58	Lung Tumor	2496.32	976	2.07144	0	0	T lymphocyte
GTAGTCAGTCCGTTAA_BRONCHO_58	Lung Tumor	2431.21	693	1.66474	2	2	T lymphocyte
GTAGTCAGTGGTACAG_BRONCHO_58	Lung Tumor	2645.32	880	1.75129	0	0	T lymphocyte
GTAGTCATCCATGAAC_BRONCHO_58	Lung Tumor	2332.02	640	0.410454	10	10	Myeloid cell
GTATCTTAGCACACAG_BRONCHO_58	Lung Tumor	3108.02	1300	1.30522	11	11	Fibroblast
GTATCTTAGTGTACGG_BRONCHO_58	Lung Tumor	2526.36	779	1.58708	2	2	T lymphocyte
GTATCTTCAGCTCGAC_BRONCHO_58	Lung Tumor	2948.52	1035	0.965636	2	2	T lymphocyte
GTATCTTGTCTAGCCG_BRONCHO_58	Lung Tumor	2389.51	751	1.53021	2	2	T lymphocyte
GTATCTTTCCAAATGC_BRONCHO_58	Lung Tumor	2147.18	564	2.06562	1	1	Myeloid cell
GTATCTTTCGTCACGG_BRONCHO_58	Lung Tumor	2774.83	912	1.57401	0	0	T lymphocyte
GTATTCTAGAACAACT_BRONCHO_58	Lung Tumor	3656.81	1879	0.105108	8	8	Epithelial
GTATTCTAGTATCTCG_BRONCHO_58	Lung Tumor	2584.5	811	1.67635	0	0	T lymphocyte
GTATTCTAGTCCAGGA_BRONCHO_58	Lung Tumor	3637.48	1506	1.41848	0	0	T lymphocyte
GTATTCTCACCACGTG_BRONCHO_58	Lung Tumor	2619.24	856	1.66966	1	1	Myeloid cell
GTATTCTGTCTGATTG_BRONCHO_58	Lung Tumor	2580.71	839	1.71574	5	5	NK cell
GTATTCTGTGCAGGTA_BRONCHO_58	Lung Tumor	5047.6	3427	1.28705	19	19	Epithelial
GTATTCTGTTAGGGTG_BRONCHO_58	Lung Tumor	2920.13	1028	1.56298	2	2	T lymphocyte
GTCAAGTAGAGCCTAG_BRONCHO_58	Lung Tumor	3187.65	1367	2.48008	17	17	Epithelial
GTCAAGTCACCACCAG_BRONCHO_58	Lung Tumor	2357.84	798	1.95573	4	4	B lymphocyte
GTCAAGTCAGCGAACA_BRONCHO_58	Lung Tumor	2907.11	993	1.16348	5	5	NK cell
GTCAAGTCATCTGGTA_BRONCHO_58	Lung Tumor	4419.21	3022	1.09197	0	0	T lymphocyte
GTCAAGTGTGCACTTA_BRONCHO_58	Lung Tumor	2553.89	2676	1.68633	13	13	B lymphocyte
GTCAAGTTCAACACCA_BRONCHO_58	Lung Tumor	4139.7	2289	1.25769	1	1	Myeloid cell
GTCAAGTTCCCTGACT_BRONCHO_58	Lung Tumor	1151.34	259	0.291734	8	8	Epithelial
GTCACAAAGTGCGATG_BRONCHO_58	Lung Tumor	3705.53	2851	1.51998	17	17	Epithelial
GTCACAAGTTTGACTG_BRONCHO_58	Lung Tumor	3583	5978	0.954997	17	17	Epithelial
GTCACAATCTGACCTC_BRONCHO_58	Lung Tumor	2925.9	1136	1.7742	2	2	T lymphocyte
GTCACGGAGTTTCCTT_BRONCHO_58	Lung Tumor	2705.84	992	1.57753	2	2	T lymphocyte
GTCACGGCAAATTGCC_BRONCHO_58	Lung Tumor	2375.12	738	1.73404	2	2	T lymphocyte
GTCACGGCAGTACACT_BRONCHO_58	Lung Tumor	1977.34	2472	1.91219	13	13	B lymphocyte
GTCACGGCAGTCGTGC_BRONCHO_58	Lung Tumor	1892.75	2305	2.28346	13	13	B lymphocyte
GTCACGGTCAGTTCGA_BRONCHO_58	Lung Tumor	2933.69	1044	1.74101	2	2	T lymphocyte
GTCACGGTCCAAGTAC_BRONCHO_58	Lung Tumor	2173.39	672	2.37629	4	4	B lymphocyte
GTCATTTAGACCTTTG_BRONCHO_58	Lung Tumor	2442.25	748	1.31642	0	0	T lymphocyte
GTCATTTGTGTCGCTG_BRONCHO_58	Lung Tumor	2607.93	962	1.88807	5	5	NK cell
GTCATTTTCAAACGGG_BRONCHO_58	Lung Tumor	3185.08	1208	1.23009	0	0	T lymphocyte
GTCCTCACAATGTAAG_BRONCHO_58	Lung Tumor	3000.79	1030	1.59552	2	2	T lymphocyte
GTCCTCAGTTAAAGAC_BRONCHO_58	Lung Tumor	4457.79	5401	1.07752	1	1	Myeloid cell
GTCCTCATCGTGGTCG_BRONCHO_58	Lung Tumor	2256.69	612	1.66549	0	0	T lymphocyte
GTCGGGTAGCAATATG_BRONCHO_58	Lung Tumor	3147.27	1225	1.921	1	1	Myeloid cell
GTCGGGTCATTGGTAC_BRONCHO_58	Lung Tumor	2421.02	768	2.31405	5	5	NK cell
GTCGGGTGTACCAGTT_BRONCHO_58	Lung Tumor	2746.71	894	1.66712	0	0	T lymphocyte
GTCGGGTGTGAGGGTT_BRONCHO_58	Lung Tumor	3419.9	1897	2.16602	17	17	Epithelial
GTCGGGTTCATGTAGC_BRONCHO_58	Lung Tumor	4631.47	5005	0.790067	17	17	Epithelial
GTCGGGTTCGTTGACA_BRONCHO_58	Lung Tumor	4329.62	2412	1.15309	11	11	Fibroblast
GTCGGGTTCTGAGTGT_BRONCHO_58	Lung Tumor	2350.76	720	2.20809	5	5	NK cell
GTCGTAACAATCCAAC_BRONCHO_58	Lung Tumor	3137.84	1119	1.272	5	5	NK cell
GTCGTAACATTTGCTT_BRONCHO_58	Lung Tumor	2401.06	710	1.84125	2	2	T lymphocyte
GTCGTAAGTCTTGTCC_BRONCHO_58	Lung Tumor	4886.26	4268	0.806307	1	1	Myeloid cell
GTCTCGTAGCGCTCCA_BRONCHO_58	Lung Tumor	2235.84	622	2.26021	0	0	T lymphocyte
GTCTCGTCAAGCGCTC_BRONCHO_58	Lung Tumor	3050.62	1547	2.32002	1	1	Myeloid cell
GTCTCGTCAGTATGCT_BRONCHO_58	Lung Tumor	3083.93	1091	1.26207	2	2	T lymphocyte
GTCTCGTTCACCTCGT_BRONCHO_58	Lung Tumor	2931.4	995	1.70698	5	5	NK cell
GTCTTCGAGACTAGGC_BRONCHO_58	Lung Tumor	3381.57	1298	1.06826	0	0	T lymphocyte
GTCTTCGAGCAGACTG_BRONCHO_58	Lung Tumor	3142.59	1158	2.10881	8	8	Epithelial
GTCTTCGAGCCTTGAT_BRONCHO_58	Lung Tumor	2587.15	822	1.68443	5	5	NK cell
GTCTTCGAGCTGAAAT_BRONCHO_58	Lung Tumor	4078.77	2253	1.24317	1	1	Myeloid cell
GTCTTCGAGGTGCTTT_BRONCHO_58	Lung Tumor	3037.66	1096	1.58176	11	11	Fibroblast
GTCTTCGAGTGATCGG_BRONCHO_58	Lung Tumor	2404.96	775	1.75994	0	0	T lymphocyte
GTCTTCGAGTGGTAGC_BRONCHO_58	Lung Tumor	3795.76	2353	1.47758	1	1	Myeloid cell
GTCTTCGGTACAGACG_BRONCHO_58	Lung Tumor	2665.32	907	1.65953	2	2	T lymphocyte
GTCTTCGGTGGAAAGA_BRONCHO_58	Lung Tumor	3478.84	1552	1.40931	0	0	T lymphocyte
GTCTTCGTCGCCATAA_BRONCHO_58	Lung Tumor	2729.76	1189	1.55294	0	0	T lymphocyte
GTCTTCGTCTACTATC_BRONCHO_58	Lung Tumor	1839.66	1907	1.69083	13	13	B lymphocyte
GTGAAGGAGAATGTTG_BRONCHO_58	Lung Tumor	2537	791	2.00845	1	1	Myeloid cell
GTGAAGGCAAGTCTGT_BRONCHO_58	Lung Tumor	4019.44	5052	1.34799	17	17	Epithelial
GTGAAGGCATTGCGGC_BRONCHO_58	Lung Tumor	2679.72	963	1.61142	2	2	T lymphocyte
GTGAAGGGTAGCGCTC_BRONCHO_58	Lung Tumor	2647.36	824	1.53119	2	2	T lymphocyte
GTGAAGGGTCTAAACC_BRONCHO_58	Lung Tumor	2631.78	837	1.61708	2	2	T lymphocyte
GTGAAGGGTTTAGCTG_BRONCHO_58	Lung Tumor	2649.41	868	2.00902	0	0	T lymphocyte
GTGCAGCAGCTATGCT_BRONCHO_58	Lung Tumor	2672.89	884	1.65249	5	5	NK cell
GTGCAGCCAAACAACA_BRONCHO_58	Lung Tumor	2774.72	927	1.5849	0	0	T lymphocyte
GTGCAGCCAAAGTCAA_BRONCHO_58	Lung Tumor	2803.71	912	1.90859	2	2	T lymphocyte
GTGCAGCCACACCGCA_BRONCHO_58	Lung Tumor	2848.49	1211	1.65369	0	0	T lymphocyte
GTGCAGCCAGATTGCT_BRONCHO_58	Lung Tumor	3009.58	985	0.0850039	8	8	Epithelial
GTGCAGCGTGCAGACA_BRONCHO_58	Lung Tumor	2054.05	628	2.77954	4	4	B lymphocyte
GTGCAGCTCCTAAGTG_BRONCHO_58	Lung Tumor	2947.34	1073	1.45643	2	2	T lymphocyte
GTGCAGCTCGAACGGA_BRONCHO_58	Lung Tumor	3038.53	1125	1.47245	1	1	Myeloid cell
GTGCAGCTCGGCTACG_BRONCHO_58	Lung Tumor	4497.29	5235	1.27784	17	17	Epithelial
GTGCAGCTCTCGCTTG_BRONCHO_58	Lung Tumor	2443.89	724	1.83254	2	2	T lymphocyte
GTGCATAAGCCACTAT_BRONCHO_58	Lung Tumor	2658.16	1039	2.1816	9	9	MAST cell
GTGCATAGTTCAGTAC_BRONCHO_58	Lung Tumor	3141.18	1161	1.25765	2	2	T lymphocyte
GTGCATATCGCCAGCA_BRONCHO_58	Lung Tumor	2959.94	1035	1.73837	2	2	T lymphocyte
GTGCGGTAGCACACAG_BRONCHO_58	Lung Tumor	4492.24	4702	1.2623	17	17	Epithelial
GTGCGGTAGCTAGTGG_BRONCHO_58	Lung Tumor	4427.49	2439	0.87583	11	11	Fibroblast
GTGCGGTAGCTTCGCG_BRONCHO_58	Lung Tumor	3959.37	3556	1.32818	17	17	Epithelial
GTGCGGTGTCACTGGC_BRONCHO_58	Lung Tumor	4167.38	3371	1.38658	1	1	Myeloid cell
GTGCGGTGTCGTTGTA_BRONCHO_58	Lung Tumor	2628.29	849	1.79621	0	0	T lymphocyte
GTGCGGTTCACTCTTA_BRONCHO_58	Lung Tumor	4383.01	4108	1.09946	17	17	Epithelial
GTGCTTCCAACGCACC_BRONCHO_58	Lung Tumor	4151.53	2903	1.30223	1	1	Myeloid cell
GTGGGTCAGACTCGGA_BRONCHO_58	Lung Tumor	2327.23	745	1.69929	4	4	B lymphocyte
GTGGGTCCAGGATTGG_BRONCHO_58	Lung Tumor	3862.86	2986	1.05074	10	10	Myeloid cell
GTGGGTCCATGATCCA_BRONCHO_58	Lung Tumor	2892.59	1002	1.48852	0	0	T lymphocyte
GTGGGTCTCACCACCT_BRONCHO_58	Lung Tumor	2589.41	879	2.06013	2	2	T lymphocyte
GTGGGTCTCTCAACTT_BRONCHO_58	Lung Tumor	2409.75	747	1.88158	5	5	NK cell
GTGTGCGAGACTTTCG_BRONCHO_58	Lung Tumor	2321.92	647	0.128695	10	10	Myeloid cell
GTGTGCGCAACTGGCC_BRONCHO_58	Lung Tumor	4314.55	3176	1.2922	17	17	Epithelial
GTGTGCGCATCGGGTC_BRONCHO_58	Lung Tumor	2320.07	712	1.94302	1	1	Myeloid cell
GTGTGCGCATTCGACA_BRONCHO_58	Lung Tumor	2717.64	998	1.6154	2	2	T lymphocyte
GTGTGCGTCCATGCTC_BRONCHO_58	Lung Tumor	2883.29	927	1.54615	2	2	T lymphocyte
GTGTTAGCAATAGCAA_BRONCHO_58	Lung Tumor	3966.42	2735	1.23202	1	1	Myeloid cell
GTGTTAGCATTATCTC_BRONCHO_58	Lung Tumor	3185.55	1351	1.57503	1	1	Myeloid cell
GTGTTAGGTGCACTTA_BRONCHO_58	Lung Tumor	3987.28	2504	1.13722	11	11	Fibroblast
GTGTTAGGTTGATTCG_BRONCHO_58	Lung Tumor	2568.28	1024	1.8327	0	0	T lymphocyte
GTGTTAGTCATCTGTT_BRONCHO_58	Lung Tumor	3139.05	1220	1.39886	0	0	T lymphocyte
GTGTTAGTCGATCCCT_BRONCHO_58	Lung Tumor	2907.47	985	1.31502	2	2	T lymphocyte
GTTAAGCAGAAGGTTT_BRONCHO_58	Lung Tumor	2178.27	649	2.206	0	0	T lymphocyte
GTTAAGCAGAGCAATT_BRONCHO_58	Lung Tumor	3762.47	2560	1.17297	17	17	Epithelial
GTTAAGCAGGGCATGT_BRONCHO_58	Lung Tumor	2599	821	1.66858	2	2	T lymphocyte
GTTAAGCAGTGGTCCC_BRONCHO_58	Lung Tumor	2705.62	893	1.69562	5	5	NK cell
GTTAAGCGTCATATGC_BRONCHO_58	Lung Tumor	2624.27	854	1.62956	2	2	T lymphocyte
GTTAAGCGTCGGCATC_BRONCHO_58	Lung Tumor	2496.66	735	2.08305	2	2	T lymphocyte
GTTAAGCGTCTAGGTT_BRONCHO_58	Lung Tumor	2007.4	568	1.8369	0	0	T lymphocyte
GTTAAGCTCAACACGT_BRONCHO_58	Lung Tumor	3818.01	3264	0.883833	17	17	Epithelial
GTTAAGCTCACGGTTA_BRONCHO_58	Lung Tumor	3353.75	1509	1.82538	1	1	Myeloid cell
GTTAAGCTCACTCTTA_BRONCHO_58	Lung Tumor	2987.78	1148	0.967638	0	0	T lymphocyte
GTTAAGCTCCGAGCCA_BRONCHO_58	Lung Tumor	4256.84	5081	1.38714	17	17	Epithelial
GTTAAGCTCGCTTGTC_BRONCHO_58	Lung Tumor	2418.15	744	2.11571	2	2	T lymphocyte
GTTAAGCTCTCGATGA_BRONCHO_58	Lung Tumor	1277.75	1028	3.46632	13	13	B lymphocyte
GTTACAGGTCCGAGTC_BRONCHO_58	Lung Tumor	994.303	632	1.33429	13	13	B lymphocyte
GTTACAGGTGTCAATC_BRONCHO_58	Lung Tumor	2953.98	1010	1.76249	2	2	T lymphocyte
GTTACAGTCGGCATCG_BRONCHO_58	Lung Tumor	2844.07	958	1.42182	0	0	T lymphocyte
GTTCATTAGCCATCGC_BRONCHO_58	Lung Tumor	3950.02	3102	1.16774	1	1	Myeloid cell
GTTCATTCAAGCTGTT_BRONCHO_58	Lung Tumor	2986.68	1019	1.57126	2	2	T lymphocyte
GTTCATTCACAGGAGT_BRONCHO_58	Lung Tumor	2465.1	836	2.00238	5	5	NK cell
GTTCATTCACGCTTTC_BRONCHO_58	Lung Tumor	2906.9	1067	1.80721	0	0	T lymphocyte
GTTCATTTCGCGTAGC_BRONCHO_58	Lung Tumor	2676.21	895	1.44789	0	0	T lymphocyte
GTTCATTTCTCAACTT_BRONCHO_58	Lung Tumor	3132.18	1181	1.18299	0	0	T lymphocyte
GTTCGGGAGGCGACAT_BRONCHO_58	Lung Tumor	2491.98	764	0.111298	10	10	Myeloid cell
GTTCGGGAGGGTGTGT_BRONCHO_58	Lung Tumor	4782.9	4725	1.11053	10	10	Myeloid cell
GTTCGGGAGTGATCGG_BRONCHO_58	Lung Tumor	4657.9	3135	1.02541	1	1	Myeloid cell
GTTCGGGCAAATTGCC_BRONCHO_58	Lung Tumor	2685.58	953	1.35076	2	2	T lymphocyte
GTTCGGGCAATGAAAC_BRONCHO_58	Lung Tumor	2435.58	806	2.27754	0	0	T lymphocyte
GTTCGGGGTCGTGGCT_BRONCHO_58	Lung Tumor	2511.23	731	2.1128	0	0	T lymphocyte
GTTCGGGTCAAACCGT_BRONCHO_58	Lung Tumor	2654.06	863	1.58849	0	0	T lymphocyte
GTTCGGGTCAAGATCC_BRONCHO_58	Lung Tumor	3358.07	1451	1.13775	0	0	T lymphocyte
GTTCGGGTCCGTTGTC_BRONCHO_58	Lung Tumor	3265.75	1214	1.2026	2	2	T lymphocyte
GTTCTCGAGATACACA_BRONCHO_58	Lung Tumor	2625.99	845	2.11814	2	2	T lymphocyte
GTTCTCGAGGCGATAC_BRONCHO_58	Lung Tumor	3997.68	2672	1.4292	1	1	Myeloid cell
GTTCTCGGTTACGACT_BRONCHO_58	Lung Tumor	4064.57	2711	1.19606	1	1	Myeloid cell
GTTCTCGTCTACGAGT_BRONCHO_58	Lung Tumor	2742.36	927	2.01567	1	1	Myeloid cell
GTTTCTAGTTCCACAA_BRONCHO_58	Lung Tumor	2606.46	898	1.83427	5	5	NK cell
GTTTCTAGTTCCCTTG_BRONCHO_58	Lung Tumor	2324.7	701	2.00919	0	0	T lymphocyte
GTTTCTATCAACACCA_BRONCHO_58	Lung Tumor	3488.34	1734	1.30641	9	9	MAST cell
GTTTCTATCAGTACGT_BRONCHO_58	Lung Tumor	2868.14	1032	1.44347	0	0	T lymphocyte
TAAACCGCAACTGCGC_BRONCHO_58	Lung Tumor	1749.91	448	0.37077	8	8	Epithelial
TAAACCGCACATGGGA_BRONCHO_58	Lung Tumor	2708.17	983	1.80453	5	5	NK cell
TAAACCGTCCGAACGC_BRONCHO_58	Lung Tumor	2579.17	904	1.96628	4	4	B lymphocyte
TAAACCGTCGCTAGCG_BRONCHO_58	Lung Tumor	4023.07	2668	1.26277	1	1	Myeloid cell
TAAACCGTCTTTCCTC_BRONCHO_58	Lung Tumor	3038.96	1081	1.50381	2	2	T lymphocyte
TAAGAGACAAACAACA_BRONCHO_58	Lung Tumor	2374.7	809	1.53856	0	0	T lymphocyte
TAAGAGATCAACGGCC_BRONCHO_58	Lung Tumor	2186.14	770	2.37189	4	4	B lymphocyte
TAAGCGTCACGCATCG_BRONCHO_58	Lung Tumor	2953.59	1097	1.15614	2	2	T lymphocyte
TAAGCGTCAGCTGTAT_BRONCHO_58	Lung Tumor	2890.38	1181	1.76564	0	0	T lymphocyte
TAAGCGTGTAATCACC_BRONCHO_58	Lung Tumor	2309.15	716	2.22998	0	0	T lymphocyte
TAAGCGTGTACTTGAC_BRONCHO_58	Lung Tumor	3915.4	2741	1.21633	1	1	Myeloid cell
TAAGCGTGTCATCGGC_BRONCHO_58	Lung Tumor	2478.06	761	1.5483	2	2	T lymphocyte
TAAGCGTGTGCTCTTC_BRONCHO_58	Lung Tumor	4202.7	3062	1.14316	1	1	Myeloid cell
TAAGCGTTCCGGCACA_BRONCHO_58	Lung Tumor	2513.24	801	1.55437	5	5	NK cell
TAAGCGTTCTACTTAC_BRONCHO_58	Lung Tumor	2161.21	672	1.90874	0	0	T lymphocyte
TAAGTGCAGAGTTGGC_BRONCHO_58	Lung Tumor	4358.63	3818	1.23577	1	1	Myeloid cell
TAAGTGCAGGGAACGG_BRONCHO_58	Lung Tumor	3149.13	1118	1.43563	0	0	T lymphocyte
TAAGTGCCATGACATC_BRONCHO_58	Lung Tumor	1567.51	433	2.75693	8	8	Epithelial
TAAGTGCGTCTGATCA_BRONCHO_58	Lung Tumor	2486.96	780	1.7189	0	0	T lymphocyte
TAAGTGCTCACGGTTA_BRONCHO_58	Lung Tumor	1930.36	551	0	8	8	Epithelial
TAAGTGCTCAGCGATT_BRONCHO_58	Lung Tumor	2790.64	877	1.40473	2	2	T lymphocyte
TAAGTGCTCATGCAAC_BRONCHO_58	Lung Tumor	2453.81	910	0.164843	8	8	Epithelial
TACACGACAATAGAGT_BRONCHO_58	Lung Tumor	2407.13	867	1.59895	0	0	T lymphocyte
TACACGACAATGAATG_BRONCHO_58	Lung Tumor	2611.46	780	1.60189	5	5	NK cell
TACACGACACCGAAAG_BRONCHO_58	Lung Tumor	2015.46	2428	1.94956	13	13	B lymphocyte
TACACGAGTTGAACTC_BRONCHO_58	Lung Tumor	2521.71	772	1.68351	2	2	T lymphocyte
TACACGAGTTGCGCAC_BRONCHO_58	Lung Tumor	4880.55	3440	0.899103	16	16	Endothelial
TACACGATCCGAAGAG_BRONCHO_58	Lung Tumor	4618.62	6684	1.11051	17	17	Epithelial
TACACGATCCGGGTGT_BRONCHO_58	Lung Tumor	3401.77	1566	1.54954	1	1	Myeloid cell
TACAGTGAGCTGCAAG_BRONCHO_58	Lung Tumor	2304.41	727	2.52229	4	4	B lymphocyte
TACAGTGCAAACCTAC_BRONCHO_58	Lung Tumor	2870.88	943	1.36168	5	5	NK cell
TACAGTGCAAAGCAAT_BRONCHO_58	Lung Tumor	3321.48	1246	0.966074	2	2	T lymphocyte
TACAGTGCAGTCGATT_BRONCHO_58	Lung Tumor	4540.82	5698	1.13352	17	17	Epithelial
TACCTATAGAATCTCC_BRONCHO_58	Lung Tumor	1883.37	489	1.75449	5	5	NK cell
TACCTATAGAGCTGGT_BRONCHO_58	Lung Tumor	4068.75	3460	1.19294	17	17	Epithelial
TACCTATAGATGTTAG_BRONCHO_58	Lung Tumor	3286.97	1326	1.39112	0	0	T lymphocyte
TACCTATCACTAGTAC_BRONCHO_58	Lung Tumor	3045.67	1252	1.18279	1	1	Myeloid cell
TACCTATCATATACGC_BRONCHO_58	Lung Tumor	2927.92	1068	1.78338	5	5	NK cell
TACCTATGTTTAAGCC_BRONCHO_58	Lung Tumor	2769.77	1009	1.53473	0	0	T lymphocyte
TACCTATTCTTGAGGT_BRONCHO_58	Lung Tumor	2961.67	1131	1.50382	0	0	T lymphocyte
TACCTTAAGACAGGCT_BRONCHO_58	Lung Tumor	2825.58	1016	1.67215	2	2	T lymphocyte
TACCTTAAGACTGGGT_BRONCHO_58	Lung Tumor	3199.33	1301	1.38899	0	0	T lymphocyte
TACCTTACAATCCAAC_BRONCHO_58	Lung Tumor	3992.17	2542	1.30946	1	1	Myeloid cell
TACCTTACACATGTGT_BRONCHO_58	Lung Tumor	2975.02	1013	1.17479	2	2	T lymphocyte
TACGGATAGGTGCACA_BRONCHO_58	Lung Tumor	1432.65	2173	2.19769	13	13	B lymphocyte
TACGGATCATTGGTAC_BRONCHO_58	Lung Tumor	3732.19	2230	0.996165	9	9	MAST cell
TACGGATGTCCGAGTC_BRONCHO_58	Lung Tumor	3583.55	1524	1.43036	7	7	Epithelial
TACGGATGTCCGTCAG_BRONCHO_58	Lung Tumor	5451.07	5453	0.780762	17	17	Epithelial
TACGGATGTCTTTCAT_BRONCHO_58	Lung Tumor	3803.68	2790	1.16774	17	17	Epithelial
TACGGATTCAACCATG_BRONCHO_58	Lung Tumor	2555.54	1023	1.90872	0	0	T lymphocyte
TACGGATTCAGTACGT_BRONCHO_58	Lung Tumor	5260.26	5555	1.26706	17	17	Epithelial
TACGGATTCTACCAGA_BRONCHO_58	Lung Tumor	3145.61	1186	1.49271	2	2	T lymphocyte
TACGGGCAGAGGTAGA_BRONCHO_58	Lung Tumor	4223.24	2384	1.21097	11	11	Fibroblast
TACGGGCAGCGATGAC_BRONCHO_58	Lung Tumor	2768.81	1121	1.44113	0	0	T lymphocyte
TACGGGCCAGACAAGC_BRONCHO_58	Lung Tumor	2483.43	743	1.84643	2	2	T lymphocyte
TACGGGCCATAGGATA_BRONCHO_58	Lung Tumor	2549.21	911	2.07669	4	4	B lymphocyte
TACGGGCCATGGAATA_BRONCHO_58	Lung Tumor	3635.24	3120	1.59813	17	17	Epithelial
TACGGGCGTACCGTAT_BRONCHO_58	Lung Tumor	3388.98	1409	1.27338	0	0	T lymphocyte
TACGGGCGTAGAAGGA_BRONCHO_58	Lung Tumor	2871.05	1130	1.47362	0	0	T lymphocyte
TACGGGCGTATCTGCA_BRONCHO_58	Lung Tumor	1891.92	528	2.75594	1	1	Myeloid cell
TACGGGCGTGTAACGG_BRONCHO_58	Lung Tumor	2802.28	918	1.80392	2	2	T lymphocyte
TACGGGCGTTACCAGT_BRONCHO_58	Lung Tumor	3021.02	1118	1.52357	2	2	T lymphocyte
TACGGGCGTTCTGAAC_BRONCHO_58	Lung Tumor	2049.67	533	0.739702	8	8	Epithelial
TACGGTAAGAACAATC_BRONCHO_58	Lung Tumor	2732.04	939	2.4389	2	2	T lymphocyte
TACGGTACAAGAAAGG_BRONCHO_58	Lung Tumor	2926.16	968	1.37971	0	0	T lymphocyte
TACTCATAGCTCCTTC_BRONCHO_58	Lung Tumor	2722.75	919	2.02347	5	5	NK cell
TACTCATCAGTTTACG_BRONCHO_58	Lung Tumor	2528.76	771	1.46581	2	2	T lymphocyte
TACTCATTCCAAATGC_BRONCHO_58	Lung Tumor	3988.37	6512	0.563239	17	17	Epithelial
TACTCGCAGGGCACTA_BRONCHO_58	Lung Tumor	1688.64	490	1.59278	10	10	Myeloid cell
TACTCGCAGTACACCT_BRONCHO_58	Lung Tumor	2768.24	867	2.31724	1	1	Myeloid cell
TACTCGCCAAACAACA_BRONCHO_58	Lung Tumor	5649.73	5009	1.12134	19	19	Epithelial
TACTCGCCACTGTGTA_BRONCHO_58	Lung Tumor	2589.09	790	2.04833	2	2	T lymphocyte
TACTCGCTCCTAGAAC_BRONCHO_58	Lung Tumor	2998.39	1192	1.52806	0	0	T lymphocyte
TACTCGCTCGGAGGTA_BRONCHO_58	Lung Tumor	2882.7	958	1.5742	2	2	T lymphocyte
TACTTACAGAAGAAGC_BRONCHO_58	Lung Tumor	1908.59	532	2.487	8	8	Epithelial
TACTTACAGAAGGGTA_BRONCHO_58	Lung Tumor	3746.45	2428	1.24155	17	17	Epithelial
TACTTACAGACGCTTT_BRONCHO_58	Lung Tumor	2689.26	831	1.69621	2	2	T lymphocyte
TACTTACCAATCGGTT_BRONCHO_58	Lung Tumor	2126.69	662	2.21192	4	4	B lymphocyte
TACTTACGTCAAACTC_BRONCHO_58	Lung Tumor	4142.66	4117	0.49581	17	17	Epithelial
TACTTACGTCCTGCTT_BRONCHO_58	Lung Tumor	3184.5	1292	1.23067	0	0	T lymphocyte
TACTTACTCGTAGATC_BRONCHO_58	Lung Tumor	3042.42	1068	1.5147	0	0	T lymphocyte
TACTTGTCAGTAAGAT_BRONCHO_58	Lung Tumor	1708.38	433	0.579506	8	8	Epithelial
TACTTGTCATTAACCG_BRONCHO_58	Lung Tumor	2721.29	993	1.59806	0	0	T lymphocyte
TACTTGTGTGGTAACG_BRONCHO_58	Lung Tumor	2811.52	1110	2.59401	2	2	T lymphocyte
TACTTGTGTTTGACTG_BRONCHO_58	Lung Tumor	2449.7	772	1.92333	5	5	NK cell
TACTTGTTCGAACTGT_BRONCHO_58	Lung Tumor	2819.58	976	1.41774	2	2	T lymphocyte
TAGACCACATTTGCTT_BRONCHO_58	Lung Tumor	4045.41	2198	1.24791	11	11	Fibroblast
TAGACCAGTAAGAGAG_BRONCHO_58	Lung Tumor	3335.53	1225	1.51651	0	0	T lymphocyte
TAGACCAGTACTCAAC_BRONCHO_58	Lung Tumor	2346.61	760	2.17998	2	2	T lymphocyte
TAGACCAGTAGCGTAG_BRONCHO_58	Lung Tumor	4047.7	4111	1.27108	17	17	Epithelial
TAGACCATCAGTGCAT_BRONCHO_58	Lung Tumor	3537.93	1753	1.55039	1	1	Myeloid cell
TAGACCATCTTCAACT_BRONCHO_58	Lung Tumor	4303.3	5004	1.36258	1	1	Myeloid cell
TAGAGCTAGCAGGCTA_BRONCHO_58	Lung Tumor	2648.58	845	1.73205	2	2	T lymphocyte
TAGAGCTTCTCCAGGG_BRONCHO_58	Lung Tumor	2686.77	857	1.62307	5	5	NK cell
TAGCCGGAGCGTCAAG_BRONCHO_58	Lung Tumor	4224.35	4171	1.09258	17	17	Epithelial
TAGCCGGGTCTAGAGG_BRONCHO_58	Lung Tumor	2533.03	806	1.66917	2	2	T lymphocyte
TAGCCGGTCAATCTCT_BRONCHO_58	Lung Tumor	2366.33	756	1.17039	14	14	T lymphocyte
TAGCCGGTCACCGTAA_BRONCHO_58	Lung Tumor	4380.16	3188	1.05402	1	1	Myeloid cell
TAGGCATAGAAGGTTT_BRONCHO_58	Lung Tumor	2723.49	1171	1.76372	4	4	B lymphocyte
TAGGCATAGCCAGTAG_BRONCHO_58	Lung Tumor	3000.38	1149	1.10212	0	0	T lymphocyte
TAGGCATCAAATCCGT_BRONCHO_58	Lung Tumor	2725.16	997	2.61663	1	1	Myeloid cell
TAGGCATCACCCATTC_BRONCHO_58	Lung Tumor	3870.94	3712	1.39927	17	17	Epithelial
TAGGCATCAGGTGCCT_BRONCHO_58	Lung Tumor	3637.4	1818	1.32978	2	2	T lymphocyte
TAGGCATCAGTATGCT_BRONCHO_58	Lung Tumor	3034.41	1238	1.27519	0	0	T lymphocyte
TAGGCATGTCAGATAA_BRONCHO_58	Lung Tumor	2499.02	864	2.07116	0	0	T lymphocyte
TAGGCATGTCTGATTG_BRONCHO_58	Lung Tumor	3985.92	3983	1.06364	17	17	Epithelial
TAGGCATGTGGTAACG_BRONCHO_58	Lung Tumor	2740.87	1062	1.95516	5	5	NK cell
TAGGCATTCATTATCC_BRONCHO_58	Lung Tumor	2718.1	895	1.89476	2	2	T lymphocyte
TAGTGGTAGCGCTTAT_BRONCHO_58	Lung Tumor	2896.86	1254	1.55831	0	0	T lymphocyte
TAGTGGTCACGAGAGT_BRONCHO_58	Lung Tumor	4775.74	6289	0.986156	17	17	Epithelial
TAGTGGTCATCCGCGA_BRONCHO_58	Lung Tumor	2619.7	885	1.46864	2	2	T lymphocyte
TAGTGGTCATCTGGTA_BRONCHO_58	Lung Tumor	3118.2	1297	1.58758	9	9	MAST cell
TAGTGGTGTAGGCATG_BRONCHO_58	Lung Tumor	3421.19	1434	1.37233	0	0	T lymphocyte
TAGTGGTGTTGGTGGA_BRONCHO_58	Lung Tumor	2836.34	996	1.69536	5	5	NK cell
TAGTGGTGTTTCCACC_BRONCHO_58	Lung Tumor	2876.99	960	1.65442	2	2	T lymphocyte
TAGTGGTTCCGAGCCA_BRONCHO_58	Lung Tumor	3240.29	1341	1.18006	0	0	T lymphocyte
TAGTTGGAGGAGCGAG_BRONCHO_58	Lung Tumor	3268.66	1393	1.04267	2	2	T lymphocyte
TAGTTGGAGGCGCTCT_BRONCHO_58	Lung Tumor	2813.14	918	1.93322	0	0	T lymphocyte
TAGTTGGCAAGCGCTC_BRONCHO_58	Lung Tumor	2846.06	922	1.49484	2	2	T lymphocyte
TAGTTGGGTCCATGAT_BRONCHO_58	Lung Tumor	3714.26	1734	1.19925	0	0	T lymphocyte
TAGTTGGTCGGGAGTA_BRONCHO_58	Lung Tumor	2655.69	848	1.52755	0	0	T lymphocyte
TAGTTGGTCTGTCAAG_BRONCHO_58	Lung Tumor	2171.23	628	1.95422	0	0	T lymphocyte
TATCAGGAGATGTGTA_BRONCHO_58	Lung Tumor	3326	1545	1.43508	9	9	MAST cell
TATCAGGCAAGAAAGG_BRONCHO_58	Lung Tumor	2637.58	911	1.88969	1	1	Myeloid cell
TATCAGGCACTTCTGC_BRONCHO_58	Lung Tumor	2911.01	979	1.35638	2	2	T lymphocyte
TATCAGGCAGAAGCAC_BRONCHO_58	Lung Tumor	3681.48	1625	1.23182	0	0	T lymphocyte
TATCAGGCATCAGTAC_BRONCHO_58	Lung Tumor	2821.4	1015	1.44288	0	0	T lymphocyte
TATCAGGGTAAGGATT_BRONCHO_58	Lung Tumor	2331.22	717	1.61136	4	4	B lymphocyte
TATCTCAAGCGCTTAT_BRONCHO_58	Lung Tumor	3282.69	1375	1.7394	1	1	Myeloid cell
TATCTCACAAGAGTCG_BRONCHO_58	Lung Tumor	2773.44	1119	1.74584	0	0	T lymphocyte
TATCTCAGTCTAAAGA_BRONCHO_58	Lung Tumor	1731.91	1711	2.09642	13	13	B lymphocyte
TATCTCAGTTTCGCTC_BRONCHO_58	Lung Tumor	2940.85	1047	0.304174	8	8	Epithelial
TATCTCATCACAGGCC_BRONCHO_58	Lung Tumor	2632.58	826	1.13255	14	14	T lymphocyte
TATGCCCAGTAGTGCG_BRONCHO_58	Lung Tumor	2288.55	774	1.88017	4	4	B lymphocyte
TATGCCCCAACTGGCC_BRONCHO_58	Lung Tumor	2443.25	750	1.90394	2	2	T lymphocyte
TATGCCCCAATGGAAT_BRONCHO_58	Lung Tumor	3238.95	1270	1.21612	0	0	T lymphocyte
TATGCCCCATGTCTCC_BRONCHO_58	Lung Tumor	2472.59	831	2.19932	5	5	NK cell
TATGCCCGTCTAGTGT_BRONCHO_58	Lung Tumor	4215.08	3573	1.36462	17	17	Epithelial
TATGCCCGTGAAAGAG_BRONCHO_58	Lung Tumor	2619.17	803	1.47556	2	2	T lymphocyte
TATGCCCGTGAGGGAG_BRONCHO_58	Lung Tumor	2248.13	796	2.20456	4	4	B lymphocyte
TATGCCCTCAGTGTTG_BRONCHO_58	Lung Tumor	4120.44	2769	1.34154	1	1	Myeloid cell
TATGCCCTCCTCAATT_BRONCHO_58	Lung Tumor	1991.81	505	0.340954	8	8	Epithelial
TATTACCAGAAGGTTT_BRONCHO_58	Lung Tumor	2413.13	925	1.93777	0	0	T lymphocyte
TATTACCAGCCACGTC_BRONCHO_58	Lung Tumor	3049.44	1330	1.45048	0	0	T lymphocyte
TATTACCTCACCTCGT_BRONCHO_58	Lung Tumor	1931.08	1169	2.31724	13	13	B lymphocyte
TATTACCTCATCTGCC_BRONCHO_58	Lung Tumor	4167.58	3515	1.37395	17	17	Epithelial
TCAACGAAGCGGCTTC_BRONCHO_58	Lung Tumor	2714.82	870	1.86149	0	0	T lymphocyte
TCAACGAAGGTTACCT_BRONCHO_58	Lung Tumor	1367.23	313	1.46054	8	8	Epithelial
TCAACGACAAAGGTGC_BRONCHO_58	Lung Tumor	2066.81	535	0	8	8	Epithelial
TCAACGATCAGTTCGA_BRONCHO_58	Lung Tumor	2624.8	879	2.05939	2	2	T lymphocyte
TCAACGATCGTAGGAG_BRONCHO_58	Lung Tumor	2512.12	751	1.57116	0	0	T lymphocyte
TCAACGATCTCCGGTT_BRONCHO_58	Lung Tumor	2766.29	886	1.77405	2	2	T lymphocyte
TCAATCTCAACAACCT_BRONCHO_58	Lung Tumor	2635.86	956	1.85461	2	2	T lymphocyte
TCAATCTCAAGCTGAG_BRONCHO_58	Lung Tumor	2768.24	952	1.50863	2	2	T lymphocyte
TCAATCTCACTTAACG_BRONCHO_58	Lung Tumor	2419.44	735	2.18244	2	2	T lymphocyte
TCAATCTCATGTTGAC_BRONCHO_58	Lung Tumor	3726.98	1807	1.30167	9	9	MAST cell
TCAATCTGTAGCGCAA_BRONCHO_58	Lung Tumor	3029.48	1032	1.23289	2	2	T lymphocyte
TCAATCTGTATCACCA_BRONCHO_58	Lung Tumor	3329.63	1379	1.24724	0	0	T lymphocyte
TCAATCTGTTACCAGT_BRONCHO_58	Lung Tumor	2478.08	981	1.57594	0	0	T lymphocyte
TCAATCTTCTATCCCG_BRONCHO_58	Lung Tumor	4070.6	4312	1.33611	17	17	Epithelial
TCAATCTTCTGGTGTA_BRONCHO_58	Lung Tumor	4542.14	7076	1.19095	17	17	Epithelial
TCACAAGAGATAGTCA_BRONCHO_58	Lung Tumor	2053.51	728	2.90559	8	8	Epithelial
TCACAAGAGCAGCGTA_BRONCHO_58	Lung Tumor	2380.1	691	1.30521	0	0	T lymphocyte
TCACAAGAGCGATAGC_BRONCHO_58	Lung Tumor	4106.8	7889	1.04195	17	17	Epithelial
TCACAAGAGGCGATAC_BRONCHO_58	Lung Tumor	2094.88	616	1.37604	0	0	T lymphocyte
TCACAAGCAAGGCTCC_BRONCHO_58	Lung Tumor	2472.46	828	1.80473	1	1	Myeloid cell
TCACAAGCACAGGAGT_BRONCHO_58	Lung Tumor	3386.8	1491	1.43908	0	0	T lymphocyte
TCACAAGCACCGGAAA_BRONCHO_58	Lung Tumor	1985.23	573	0.322106	8	8	Epithelial
TCACAAGCAGCTCGAC_BRONCHO_58	Lung Tumor	2963.89	1158	1.74315	9	9	MAST cell
TCACAAGCAGGTTTCA_BRONCHO_58	Lung Tumor	3162.12	1225	1.66854	2	2	T lymphocyte
TCACAAGTCAATCACG_BRONCHO_58	Lung Tumor	4681.88	4032	0.919954	11	11	Fibroblast
TCACAAGTCTCTTATG_BRONCHO_58	Lung Tumor	2714.99	996	1.71281	5	5	NK cell
TCACAAGTCTGCTGTC_BRONCHO_58	Lung Tumor	4654.7	4048	1.08019	1	1	Myeloid cell
TCACAAGTCTGTTTGT_BRONCHO_58	Lung Tumor	2852.5	935	1.5593	2	2	T lymphocyte
TCACGAAAGCTGAAAT_BRONCHO_58	Lung Tumor	2968	1086	1.46028	0	0	T lymphocyte
TCACGAAAGGTACTCT_BRONCHO_58	Lung Tumor	4091.18	2293	1.0869	0	0	T lymphocyte
TCACGAAAGTGTTGAA_BRONCHO_58	Lung Tumor	2744.5	1004	2.03514	0	0	T lymphocyte
TCACGAACACTTCTGC_BRONCHO_58	Lung Tumor	3283.6	1285	1.6675	2	2	T lymphocyte
TCACGAACAGGTGCCT_BRONCHO_58	Lung Tumor	2854.96	987	1.51102	2	2	T lymphocyte
TCACGAAGTACTTAGC_BRONCHO_58	Lung Tumor	3088.87	1228	1.27574	4	4	B lymphocyte
TCACGAAGTACTTGAC_BRONCHO_58	Lung Tumor	3248.13	1266	1.30391	2	2	T lymphocyte
TCACGAAGTGTGGCTC_BRONCHO_58	Lung Tumor	2225.5	696	2.25846	4	4	B lymphocyte
TCACGAATCCAAAGTC_BRONCHO_58	Lung Tumor	3246.25	1276	1.73006	1	1	Myeloid cell
TCACGAATCCGAAGAG_BRONCHO_58	Lung Tumor	1805.09	2590	2.20582	13	13	B lymphocyte
TCACGAATCCGTAGGC_BRONCHO_58	Lung Tumor	2944.48	1217	1.54459	0	0	T lymphocyte
TCAGATGAGAACTGTA_BRONCHO_58	Lung Tumor	2685.09	909	1.89972	5	5	NK cell
TCAGATGCAACACCTA_BRONCHO_58	Lung Tumor	2298.34	785	2.28332	1	1	Myeloid cell
TCAGATGCACAGCCCA_BRONCHO_58	Lung Tumor	3068.89	1430	1.56685	4	4	B lymphocyte
TCAGATGTCCCGGATG_BRONCHO_58	Lung Tumor	2907.7	1042	1.74942	5	5	NK cell
TCAGCAAAGACTGGGT_BRONCHO_58	Lung Tumor	2343.98	742	1.97547	4	4	B lymphocyte
TCAGCAAAGAGGACGG_BRONCHO_58	Lung Tumor	1997.59	518	0	8	8	Epithelial
TCAGCAAAGCTTATCG_BRONCHO_58	Lung Tumor	2453.28	842	2.25158	0	0	T lymphocyte
TCAGCAACATGACGGA_BRONCHO_58	Lung Tumor	2710.82	874	1.41787	2	2	T lymphocyte
TCAGCAACATGCAACT_BRONCHO_58	Lung Tumor	4046.45	2027	0.95656	0	0	T lymphocyte
TCAGCAATCCACGTTC_BRONCHO_58	Lung Tumor	4200.27	3472	0.874311	17	17	Epithelial
TCAGCAATCGGCCGAT_BRONCHO_58	Lung Tumor	2790.45	1009	1.46021	0	0	T lymphocyte
TCAGCTCCAATAGAGT_BRONCHO_58	Lung Tumor	2863.18	1030	1.83758	2	2	T lymphocyte
TCAGCTCCAGCATACT_BRONCHO_58	Lung Tumor	2614.31	1138	1.56535	0	0	T lymphocyte
TCAGCTCCAGTACACT_BRONCHO_58	Lung Tumor	3045.82	1176	1.23947	0	0	T lymphocyte
TCAGCTCCATATGGTC_BRONCHO_58	Lung Tumor	2421.85	728	2.06671	1	1	Myeloid cell
TCAGCTCGTAACGACG_BRONCHO_58	Lung Tumor	3141.15	1253	1.53723	0	0	T lymphocyte
TCAGCTCTCCCGGATG_BRONCHO_58	Lung Tumor	3547.22	1424	1.42228	1	1	Myeloid cell
TCAGCTCTCCTGCCAT_BRONCHO_58	Lung Tumor	2330.74	836	1.8999	4	4	B lymphocyte
TCAGCTCTCCTGCTTG_BRONCHO_58	Lung Tumor	4022.02	3389	1.14454	1	1	Myeloid cell
TCAGCTCTCTGCCAGG_BRONCHO_58	Lung Tumor	2692.88	921	2.01116	2	2	T lymphocyte
TCAGCTCTCTTTACAC_BRONCHO_58	Lung Tumor	4592.77	4088	1.08918	11	11	Fibroblast
TCAGGATAGTCCATAC_BRONCHO_58	Lung Tumor	4403.71	3253	1.11672	1	1	Myeloid cell
TCAGGATCACCAGGTC_BRONCHO_58	Lung Tumor	4014.65	2851	1.5808	17	17	Epithelial
TCAGGATCATTTCACT_BRONCHO_58	Lung Tumor	2308.16	673	1.36504	0	0	T lymphocyte
TCAGGATTCAACACTG_BRONCHO_58	Lung Tumor	3512.78	1718	2.09762	17	17	Epithelial
TCAGGTAAGGATGGTC_BRONCHO_58	Lung Tumor	4192.81	2828	1.20844	1	1	Myeloid cell
TCAGGTAAGTACATGA_BRONCHO_58	Lung Tumor	3156.41	1196	1.29328	5	5	NK cell
TCAGGTAAGTACGCGA_BRONCHO_58	Lung Tumor	2716.03	985	1.80141	5	5	NK cell
TCAGGTACAAAGCAAT_BRONCHO_58	Lung Tumor	2761.31	947	1.66955	2	2	T lymphocyte
TCAGGTACAAGACGTG_BRONCHO_58	Lung Tumor	1800.3	469	2.45531	0	0	T lymphocyte
TCAGGTACAATGTTGC_BRONCHO_58	Lung Tumor	4057.87	3415	1.48057	1	1	Myeloid cell
TCAGGTACAGAGTGTG_BRONCHO_58	Lung Tumor	3214.62	1353	1.48955	0	0	T lymphocyte
TCAGGTAGTACACCGC_BRONCHO_58	Lung Tumor	2215	1037	1.37433	8	8	Epithelial
TCAGGTAGTCCGAGTC_BRONCHO_58	Lung Tumor	2715.56	898	1.66602	2	2	T lymphocyte
TCAGGTAGTGAAATCA_BRONCHO_58	Lung Tumor	2515.51	823	1.41229	0	0	T lymphocyte
TCAGGTATCCGGCACA_BRONCHO_58	Lung Tumor	1129.63	245	0	8	8	Epithelial
TCAGGTATCTAAGCCA_BRONCHO_58	Lung Tumor	3010.35	1071	1.51144	2	2	T lymphocyte
TCATTACAGCACCGCT_BRONCHO_58	Lung Tumor	2435.16	796	1.28525	1	1	Myeloid cell
TCATTACCACATAACC_BRONCHO_58	Lung Tumor	3920.2	2149	1.51352	1	1	Myeloid cell
TCATTACGTAATCACC_BRONCHO_58	Lung Tumor	3356.29	1389	1.36584	0	0	T lymphocyte
TCATTACTCCGATATG_BRONCHO_58	Lung Tumor	3074.93	1170	0.130728	8	8	Epithelial
TCATTACTCTAACTCT_BRONCHO_58	Lung Tumor	2877.38	1003	1.50478	0	0	T lymphocyte
TCATTTGAGTCAAGGC_BRONCHO_58	Lung Tumor	2807.74	946	1.45427	0	0	T lymphocyte
TCATTTGCAAAGGAAG_BRONCHO_58	Lung Tumor	3327.85	1482	1.4534	1	1	Myeloid cell
TCATTTGCATACCATG_BRONCHO_58	Lung Tumor	2601.77	857	1.6977	0	0	T lymphocyte
TCATTTGGTCCCTTGT_BRONCHO_58	Lung Tumor	2693.46	942	0.113954	8	8	Epithelial
TCATTTGGTTGTTTGG_BRONCHO_58	Lung Tumor	3882.84	2599	1.19442	0	0	T lymphocyte
TCATTTGGTTTCGCTC_BRONCHO_58	Lung Tumor	2808.26	996	1.91954	5	5	NK cell
TCCACACAGCGCTTAT_BRONCHO_58	Lung Tumor	2812.07	996	1.38321	0	0	T lymphocyte
TCCACACCAGCGAACA_BRONCHO_58	Lung Tumor	2568.6	816	2.32177	2	2	T lymphocyte
TCCACACCATTCCTCG_BRONCHO_58	Lung Tumor	1147.43	1156	2.49037	13	13	B lymphocyte
TCCACACGTCTCAACA_BRONCHO_58	Lung Tumor	3173.42	1176	1.00501	2	2	T lymphocyte
TCCACACGTTACCAGT_BRONCHO_58	Lung Tumor	3041.84	1076	1.58314	5	5	NK cell
TCCACACTCAAAGTAG_BRONCHO_58	Lung Tumor	4065.99	2083	0.825464	2	2	T lymphocyte
TCCCGATAGGACATTA_BRONCHO_58	Lung Tumor	2564.76	886	1.56819	2	2	T lymphocyte
TCCCGATCATCGTCGG_BRONCHO_58	Lung Tumor	2315.82	830	2.13435	4	4	B lymphocyte
TCCCGATTCATGGTCA_BRONCHO_58	Lung Tumor	1959.83	518	2.57048	0	0	T lymphocyte
TCGAGGCAGGATGCGT_BRONCHO_58	Lung Tumor	2672.59	895	1.84597	5	5	NK cell
TCGAGGCCAGCTGCTG_BRONCHO_58	Lung Tumor	2583.47	836	1.9412	5	5	NK cell
TCGAGGCCAGTATCTG_BRONCHO_58	Lung Tumor	4176.72	3875	1.2514	17	17	Epithelial
TCGAGGCGTCTTCGTC_BRONCHO_58	Lung Tumor	2557.41	795	1.29685	2	2	T lymphocyte
TCGAGGCGTGTGGTTT_BRONCHO_58	Lung Tumor	3037.83	1083	1.75781	2	2	T lymphocyte
TCGAGGCTCACTTCAT_BRONCHO_58	Lung Tumor	4264	3043	1.27408	1	1	Myeloid cell
TCGAGGCTCGGCGCTA_BRONCHO_58	Lung Tumor	4671.92	3670	1.16163	17	17	Epithelial
TCGAGGCTCTCTGAGA_BRONCHO_58	Lung Tumor	3263.29	1337	1.41816	0	0	T lymphocyte
TCGCGAGAGATCCTGT_BRONCHO_58	Lung Tumor	2723.54	1011	1.53131	0	0	T lymphocyte
TCGCGAGAGGGTTTCT_BRONCHO_58	Lung Tumor	4559.67	4856	1.12902	17	17	Epithelial
TCGCGAGAGTAGCCGA_BRONCHO_58	Lung Tumor	3736.15	2180	1.75726	17	17	Epithelial
TCGCGAGAGTAGTGCG_BRONCHO_58	Lung Tumor	3756.33	2628	1.46025	17	17	Epithelial
TCGCGAGCACGGCGTT_BRONCHO_58	Lung Tumor	2837.31	1167	1.56239	0	0	T lymphocyte
TCGCGAGCACTTAACG_BRONCHO_58	Lung Tumor	2758.31	1050	1.69211	0	0	T lymphocyte
TCGCGAGCAGGATTGG_BRONCHO_58	Lung Tumor	2840.94	975	1.39605	2	2	T lymphocyte
TCGCGAGGTTCCACTC_BRONCHO_58	Lung Tumor	4060.01	2457	1.2713	1	1	Myeloid cell
TCGCGTTAGGACAGAA_BRONCHO_58	Lung Tumor	2148.22	726	0.102143	8	8	Epithelial
TCGCGTTCAATCGAAA_BRONCHO_58	Lung Tumor	4144.72	2753	1.57853	1	1	Myeloid cell
TCGCGTTCAGTATGCT_BRONCHO_58	Lung Tumor	1229.8	280	4.85531	8	8	Epithelial
TCGCGTTGTACCGAGA_BRONCHO_58	Lung Tumor	3841.49	1673	0.971401	11	11	Fibroblast
TCGCGTTGTCGACTAT_BRONCHO_58	Lung Tumor	2702.21	920	0.204949	8	8	Epithelial
TCGCGTTGTTGTGGCC_BRONCHO_58	Lung Tumor	2615.36	862	1.66963	0	0	T lymphocyte
TCGGGACAGAGCCCAA_BRONCHO_58	Lung Tumor	2504.88	798	2.05468	2	2	T lymphocyte
TCGGGACAGCCGGTAA_BRONCHO_58	Lung Tumor	2432.77	738	1.51427	2	2	T lymphocyte
TCGGGACAGTGTGGCA_BRONCHO_58	Lung Tumor	3684.78	1952	1.37355	11	11	Fibroblast
TCGGGACTCACTGGGC_BRONCHO_58	Lung Tumor	3119.18	1124	1.32824	0	0	T lymphocyte
TCGGTAAAGACCCACC_BRONCHO_58	Lung Tumor	2670.43	868	1.15443	0	0	T lymphocyte
TCGGTAAAGCTGGAAC_BRONCHO_58	Lung Tumor	4799.36	5937	1.09351	17	17	Epithelial
TCGGTAACAACGATCT_BRONCHO_58	Lung Tumor	1724.68	1837	2.09402	13	13	B lymphocyte
TCGTACCAGAAGGCCT_BRONCHO_58	Lung Tumor	3105.57	1101	1.42586	2	2	T lymphocyte
TCGTACCAGACTGTAA_BRONCHO_58	Lung Tumor	2944.78	1166	1.30583	11	11	Fibroblast
TCGTACCAGTGACTCT_BRONCHO_58	Lung Tumor	2868.89	994	1.80653	5	5	NK cell
TCGTACCCAAGCCATT_BRONCHO_58	Lung Tumor	2672.79	890	1.77645	2	2	T lymphocyte
TCGTACCCACCAGCAC_BRONCHO_58	Lung Tumor	2658.01	842	1.36747	1	1	Myeloid cell
TCGTACCCATATACCG_BRONCHO_58	Lung Tumor	4120.01	3164	1.18195	17	17	Epithelial
TCGTACCGTAACGCGA_BRONCHO_58	Lung Tumor	2748.56	910	1.45259	5	5	NK cell
TCGTACCGTAAGTGGC_BRONCHO_58	Lung Tumor	3434.12	1625	1.36151	0	0	T lymphocyte
TCGTACCGTCACTTCC_BRONCHO_58	Lung Tumor	2514.42	773	2.19856	2	2	T lymphocyte
TCGTACCGTCATCCCT_BRONCHO_58	Lung Tumor	2834.14	1103	1.35837	0	0	T lymphocyte
TCGTACCGTTGGGACA_BRONCHO_58	Lung Tumor	3123.48	1053	1.41986	5	5	NK cell
TCGTACCTCCTTGCCA_BRONCHO_58	Lung Tumor	2759.12	948	1.92547	5	5	NK cell
TCGTACCTCTCTGAGA_BRONCHO_58	Lung Tumor	2848.03	995	1.5	0	0	T lymphocyte
TCGTAGAAGCGATAGC_BRONCHO_58	Lung Tumor	4123.83	3646	1.08909	17	17	Epithelial
TCGTAGACAGCGTCCA_BRONCHO_58	Lung Tumor	2567.3	795	1.70116	2	2	T lymphocyte
TCGTAGAGTACAGTGG_BRONCHO_58	Lung Tumor	2440.17	726	1.88404	2	2	T lymphocyte
TCGTAGAGTATGGTTC_BRONCHO_58	Lung Tumor	3414.93	1748	1.29109	1	1	Myeloid cell
TCGTAGAGTCGCATCG_BRONCHO_58	Lung Tumor	2430.11	748	1.91468	1	1	Myeloid cell
TCGTAGATCAGGTAAA_BRONCHO_58	Lung Tumor	1212.08	302	0.301333	8	8	Epithelial
TCGTAGATCGGTTAAC_BRONCHO_58	Lung Tumor	3706.86	2060	1.26239	9	9	MAST cell
TCGTAGATCTTAGAGC_BRONCHO_58	Lung Tumor	2613.93	835	1.69098	2	2	T lymphocyte
TCTATTGAGCCAGTTT_BRONCHO_58	Lung Tumor	4000.65	3418	1.28066	17	17	Epithelial
TCTATTGAGTGGAGAA_BRONCHO_58	Lung Tumor	2827.22	1293	0.198438	10	10	Myeloid cell
TCTATTGCATTTCACT_BRONCHO_58	Lung Tumor	3482.27	1879	0.577307	1	1	Myeloid cell
TCTATTGGTCCGAACC_BRONCHO_58	Lung Tumor	2625.37	993	1.69088	0	0	T lymphocyte
TCTATTGTCGAATCCA_BRONCHO_58	Lung Tumor	4263.86	5608	1.30208	17	17	Epithelial
TCTATTGTCGCATGGC_BRONCHO_58	Lung Tumor	2045.24	613	2.14046	4	4	B lymphocyte
TCTCATAAGATATGGT_BRONCHO_58	Lung Tumor	3234.46	1297	1.57543	11	11	Fibroblast
TCTCATAAGGCCATAG_BRONCHO_58	Lung Tumor	3047.16	1079	1.23971	2	2	T lymphocyte
TCTCATAAGTAGGTGC_BRONCHO_58	Lung Tumor	2536.51	853	1.70025	0	0	T lymphocyte
TCTCATACAATCAGAA_BRONCHO_58	Lung Tumor	2932.44	1080	1.70604	0	0	T lymphocyte
TCTCATACAGGGATTG_BRONCHO_58	Lung Tumor	3926.23	3033	1.2449	10	10	Myeloid cell
TCTCATACAGGGTTAG_BRONCHO_58	Lung Tumor	2656.69	878	1.35148	5	5	NK cell
TCTCATAGTTCTCATT_BRONCHO_58	Lung Tumor	2874.2	1168	1.61143	0	0	T lymphocyte
TCTCATATCATAGCAC_BRONCHO_58	Lung Tumor	2463.34	808	1.95994	2	2	T lymphocyte
TCTCATATCCACGCAG_BRONCHO_58	Lung Tumor	3845.55	4171	1.05804	17	17	Epithelial
TCTCATATCCTCATTA_BRONCHO_58	Lung Tumor	3513.19	2811	1.71818	17	17	Epithelial
TCTCATATCCTTTCTC_BRONCHO_58	Lung Tumor	4486.72	3269	1.08028	1	1	Myeloid cell
TCTCTAAAGGACATTA_BRONCHO_58	Lung Tumor	1703.14	555	2.74511	8	8	Epithelial
TCTCTAACATGTTGAC_BRONCHO_58	Lung Tumor	3402.74	1406	1.40712	2	2	T lymphocyte
TCTCTAATCCGGGTGT_BRONCHO_58	Lung Tumor	4144.95	2521	1.32723	1	1	Myeloid cell
TCTGAGAAGACGCACA_BRONCHO_58	Lung Tumor	2866.57	1038	1.62545	0	0	T lymphocyte
TCTGAGAAGTACGACG_BRONCHO_58	Lung Tumor	2591.86	820	1.41617	2	2	T lymphocyte
TCTGAGACATCCCATC_BRONCHO_58	Lung Tumor	2425.12	762	1.99014	5	5	NK cell
TCTGAGAGTACTTCTT_BRONCHO_58	Lung Tumor	2933.71	977	1.49337	2	2	T lymphocyte
TCTGAGAGTCATACTG_BRONCHO_58	Lung Tumor	3793.25	2117	1.4922	1	1	Myeloid cell
TCTGAGAGTGTCGCTG_BRONCHO_58	Lung Tumor	4029.38	2624	1.423	1	1	Myeloid cell
TCTGAGATCTCGATGA_BRONCHO_58	Lung Tumor	2631.1	933	1.86547	2	2	T lymphocyte
TCTGGAAAGACTAGAT_BRONCHO_58	Lung Tumor	3025.03	1029	1.7262	0	0	T lymphocyte
TCTGGAAAGCTACCTA_BRONCHO_58	Lung Tumor	2825.71	917	1.74006	2	2	T lymphocyte
TCTGGAAAGTACACCT_BRONCHO_58	Lung Tumor	2461.97	789	1.47621	0	0	T lymphocyte
TCTGGAACAATGACCT_BRONCHO_58	Lung Tumor	2484.99	817	2.02957	0	0	T lymphocyte
TCTGGAACACCGCTAG_BRONCHO_58	Lung Tumor	1670.73	428	3.07972	1	1	Myeloid cell
TCTGGAACAGTCGTGC_BRONCHO_58	Lung Tumor	1339.79	341	4.38855	8	8	Epithelial
TCTTCGGAGAGCTGCA_BRONCHO_58	Lung Tumor	966.398	270	2.11202	13	13	B lymphocyte
TCTTCGGGTTAAGATG_BRONCHO_58	Lung Tumor	2204.23	595	0.434962	8	8	Epithelial
TCTTCGGTCCGAAGAG_BRONCHO_58	Lung Tumor	1899.36	539	0.298513	8	8	Epithelial
TCTTCGGTCTTAGCCC_BRONCHO_58	Lung Tumor	2520.77	782	2.15459	2	2	T lymphocyte
TCTTTCCCAAGTAGTA_BRONCHO_58	Lung Tumor	2395.04	735	1.76854	0	0	T lymphocyte
TCTTTCCCACCAACCG_BRONCHO_58	Lung Tumor	4613.38	5369	1.00565	17	17	Epithelial
TCTTTCCTCAACGCTA_BRONCHO_58	Lung Tumor	2114.55	680	2.38301	4	4	B lymphocyte
TCTTTCCTCAGTGCAT_BRONCHO_58	Lung Tumor	2956.27	1115	1.77249	5	5	NK cell
TCTTTCCTCAGTTCGA_BRONCHO_58	Lung Tumor	4295.61	3190	0.918286	17	17	Epithelial
TGAAAGAAGGAGCGTT_BRONCHO_58	Lung Tumor	4041.14	2510	1.20528	1	1	Myeloid cell
TGAAAGACAAACGCGA_BRONCHO_58	Lung Tumor	4804.61	4312	1.07539	1	1	Myeloid cell
TGAAAGACAGTCACTA_BRONCHO_58	Lung Tumor	3089.84	1068	1.282	2	2	T lymphocyte
TGAAAGACAGTGGAGT_BRONCHO_58	Lung Tumor	2826.24	949	1.613	0	0	T lymphocyte
TGAAAGAGTCTGATTG_BRONCHO_58	Lung Tumor	3369.31	2787	0.21045	8	8	Epithelial
TGAAAGAGTGCTTCTC_BRONCHO_58	Lung Tumor	3154.47	1186	2.05215	2	2	T lymphocyte
TGAAAGAGTTGGACCC_BRONCHO_58	Lung Tumor	2855.59	980	1.41282	5	5	NK cell
TGAAAGATCCTCCTAG_BRONCHO_58	Lung Tumor	3433.17	1894	1.27168	0	0	T lymphocyte
TGAAAGATCCTTAATC_BRONCHO_58	Lung Tumor	3728.73	2314	1.2105	1	1	Myeloid cell
TGAAAGATCGGAGGTA_BRONCHO_58	Lung Tumor	2679.11	843	1.58018	0	0	T lymphocyte
TGAAAGATCTACGAGT_BRONCHO_58	Lung Tumor	3012.78	1152	1.26758	0	0	T lymphocyte
TGACAACAGTGTACTC_BRONCHO_58	Lung Tumor	2728.08	872	1.5539	2	2	T lymphocyte
TGACAACGTCGGGTCT_BRONCHO_58	Lung Tumor	3034.22	1087	1.33518	2	2	T lymphocyte
TGACGGCGTCATCGGC_BRONCHO_58	Lung Tumor	2200.11	778	2.06895	4	4	B lymphocyte
TGACTAGCAAACGTGG_BRONCHO_58	Lung Tumor	2425.31	1049	2.06865	0	0	T lymphocyte
TGACTAGCACTTCTGC_BRONCHO_58	Lung Tumor	2371.52	732	2.04177	2	2	T lymphocyte
TGACTAGGTCACTGGC_BRONCHO_58	Lung Tumor	2810.07	1031	1.70303	1	1	Myeloid cell
TGACTAGGTCATATGC_BRONCHO_58	Lung Tumor	4715.41	6871	1.1118	17	17	Epithelial
TGACTAGGTTCAGGCC_BRONCHO_58	Lung Tumor	2434.09	727	2.16797	0	0	T lymphocyte
TGACTAGTCCACTCCA_BRONCHO_58	Lung Tumor	3268.64	1226	1.25899	2	2	T lymphocyte
TGACTTTAGTTACCCA_BRONCHO_58	Lung Tumor	3642.43	1533	1.41431	7	7	Epithelial
TGACTTTCACTTAACG_BRONCHO_58	Lung Tumor	4652.78	5161	1.21735	17	17	Epithelial
TGACTTTCAGGTCTCG_BRONCHO_58	Lung Tumor	2848.12	930	1.394	2	2	T lymphocyte
TGAGAGGCACTGTGTA_BRONCHO_58	Lung Tumor	2482.91	772	1.80401	2	2	T lymphocyte
TGAGAGGTCAAGGTAA_BRONCHO_58	Lung Tumor	3417.97	1585	1.59781	2	2	T lymphocyte
TGAGAGGTCCAGATCA_BRONCHO_58	Lung Tumor	2253.25	635	1.82886	1	1	Myeloid cell
TGAGAGGTCGTACCGG_BRONCHO_58	Lung Tumor	2546.38	822	1.70414	2	2	T lymphocyte
TGAGCATAGGAGTACC_BRONCHO_58	Lung Tumor	3234.74	1226	1.52306	0	0	T lymphocyte
TGAGCATCAAAGGCGT_BRONCHO_58	Lung Tumor	2363.45	729	1.96206	4	4	B lymphocyte
TGAGCATCAAGGTTTC_BRONCHO_58	Lung Tumor	2752.72	989	1.58358	0	0	T lymphocyte
TGAGCATCATCGACGC_BRONCHO_58	Lung Tumor	2215.3	602	1.50511	2	2	T lymphocyte
TGAGCATCATGTAAGA_BRONCHO_58	Lung Tumor	5068.88	4357	0.888397	11	11	Fibroblast
TGAGCATGTTCGTGAT_BRONCHO_58	Lung Tumor	1891.46	521	0.69568	8	8	Epithelial
TGAGCATTCAATCACG_BRONCHO_58	Lung Tumor	2262.03	803	2.28912	4	4	B lymphocyte
TGAGCATTCAGCTCGG_BRONCHO_58	Lung Tumor	2471.57	989	2.25369	4	4	B lymphocyte
TGAGCATTCTGTGCAA_BRONCHO_58	Lung Tumor	2180.49	637	2.12859	4	4	B lymphocyte
TGAGCCGCACAGACAG_BRONCHO_58	Lung Tumor	4019.13	1896	0.516025	10	10	Myeloid cell
TGAGCCGCACCCATTC_BRONCHO_58	Lung Tumor	4312.28	4346	1.06056	17	17	Epithelial
TGAGCCGCAGATTGCT_BRONCHO_58	Lung Tumor	2324.38	744	1.64845	2	2	T lymphocyte
TGAGCCGCAGCGAACA_BRONCHO_58	Lung Tumor	2154.44	625	1.66964	2	2	T lymphocyte
TGAGCCGGTCGTGGCT_BRONCHO_58	Lung Tumor	2591.05	1073	2.22263	0	0	T lymphocyte
TGAGCCGTCTTGGGTA_BRONCHO_58	Lung Tumor	2327.22	905	1.52597	8	8	Epithelial
TGAGGGAAGCTTATCG_BRONCHO_58	Lung Tumor	2548.49	813	2.10526	5	5	NK cell
TGAGGGAAGGTGGGTT_BRONCHO_58	Lung Tumor	4703.02	6814	0.973135	17	17	Epithelial
TGAGGGAAGTGACTCT_BRONCHO_58	Lung Tumor	2709.78	927	1.85933	2	2	T lymphocyte
TGAGGGACACGCGAAA_BRONCHO_58	Lung Tumor	3282.48	1456	1.52049	1	1	Myeloid cell
TGAGGGACAGTGGAGT_BRONCHO_58	Lung Tumor	2327.95	760	2.29141	0	0	T lymphocyte
TGAGGGAGTACTTAGC_BRONCHO_58	Lung Tumor	2988.9	1009	1.69883	5	5	NK cell
TGAGGGAGTCCGAATT_BRONCHO_58	Lung Tumor	2321.67	718	0.224884	8	8	Epithelial
TGAGGGATCCCACTTG_BRONCHO_58	Lung Tumor	3610.39	1626	1.37136	10	10	Myeloid cell
TGAGGGATCGAATGGG_BRONCHO_58	Lung Tumor	3387.29	1315	1.3433	16	16	Endothelial
TGAGGGATCGACGGAA_BRONCHO_58	Lung Tumor	681.532	245	2.75174	13	13	B lymphocyte
TGAGGGATCGTCACGG_BRONCHO_58	Lung Tumor	3602.94	1586	1.09392	0	0	T lymphocyte
TGATTTCAGATATGGT_BRONCHO_58	Lung Tumor	4351.17	4734	1.34691	17	17	Epithelial
TGATTTCAGCGCCTCA_BRONCHO_58	Lung Tumor	4090.29	2414	1.39923	1	1	Myeloid cell
TGATTTCAGCGCTTAT_BRONCHO_58	Lung Tumor	4658.96	3248	1.34021	11	11	Fibroblast
TGATTTCAGTCTCCTC_BRONCHO_58	Lung Tumor	1919.42	556	1.93289	8	8	Epithelial
TGATTTCAGTTAGGTA_BRONCHO_58	Lung Tumor	2588.92	812	1.77559	2	2	T lymphocyte
TGATTTCTCACAAACC_BRONCHO_58	Lung Tumor	2688.33	900	1.3011	2	2	T lymphocyte
TGATTTCTCCGCGGTA_BRONCHO_58	Lung Tumor	3209.47	1227	1.32773	2	2	T lymphocyte
TGCACCTAGCGCCTTG_BRONCHO_58	Lung Tumor	2064.62	558	1.57611	0	0	T lymphocyte
TGCACCTCAACACCTA_BRONCHO_58	Lung Tumor	605.093	248	1.22034	13	13	B lymphocyte
TGCACCTCACAGACTT_BRONCHO_58	Lung Tumor	2725.23	889	1.70306	0	0	T lymphocyte
TGCACCTCACGAGGTA_BRONCHO_58	Lung Tumor	1894.51	1934	2.06396	13	13	B lymphocyte
TGCACCTGTTACGACT_BRONCHO_58	Lung Tumor	3284.84	1168	0.347212	10	10	Myeloid cell
TGCACCTGTTCGCGAC_BRONCHO_58	Lung Tumor	2384.75	902	1.79964	0	0	T lymphocyte
TGCACCTTCAGCACAT_BRONCHO_58	Lung Tumor	4889.89	3988	1.17382	11	11	Fibroblast
TGCACCTTCCGAGCCA_BRONCHO_58	Lung Tumor	2420.75	999	1.90868	0	0	T lymphocyte
TGCACCTTCTGCGTAA_BRONCHO_58	Lung Tumor	2333.24	763	2.03217	5	5	NK cell
TGCCAAAAGATGTGTA_BRONCHO_58	Lung Tumor	2782.06	957	1.55752	2	2	T lymphocyte
TGCCAAAAGCTAAGAT_BRONCHO_58	Lung Tumor	2809.04	985	1.48664	2	2	T lymphocyte
TGCCAAACATGGTCTA_BRONCHO_58	Lung Tumor	2424.53	747	1.85958	2	2	T lymphocyte
TGCCAAAGTCAACATC_BRONCHO_58	Lung Tumor	2421.57	738	2.32096	0	0	T lymphocyte
TGCCAAAGTTGTTTGG_BRONCHO_58	Lung Tumor	2640.07	796	1.71547	0	0	T lymphocyte
TGCCAAATCCAAACAC_BRONCHO_58	Lung Tumor	4099.8	2387	1.23412	1	1	Myeloid cell
TGCCCATAGTGTTAGA_BRONCHO_58	Lung Tumor	2410.43	726	1.90674	2	2	T lymphocyte
TGCCCATCAAAGGTGC_BRONCHO_58	Lung Tumor	3460.94	1402	1.48041	0	0	T lymphocyte
TGCCCATTCCGCTGTT_BRONCHO_58	Lung Tumor	2828.42	1023	1.56998	5	5	NK cell
TGCCCATTCTGATTCT_BRONCHO_58	Lung Tumor	2954.79	927	1.84921	2	2	T lymphocyte
TGCCCTAAGAGTCTGG_BRONCHO_58	Lung Tumor	3722.92	1754	1.23725	0	0	T lymphocyte
TGCCCTAAGCGTTGCC_BRONCHO_58	Lung Tumor	2979.16	1051	1.4832	2	2	T lymphocyte
TGCCCTAAGCTTCGCG_BRONCHO_58	Lung Tumor	4653.95	7869	0.997767	17	17	Epithelial
TGCCCTACAGCATGAG_BRONCHO_58	Lung Tumor	2822.89	925	1.72164	0	0	T lymphocyte
TGCCCTAGTGGGTATG_BRONCHO_58	Lung Tumor	2675.5	826	1.60187	2	2	T lymphocyte
TGCCCTATCCGAATGT_BRONCHO_58	Lung Tumor	4539.76	3942	0.833293	17	17	Epithelial
TGCGCAGAGAGCTGCA_BRONCHO_58	Lung Tumor	2962.72	1064	1.64057	2	2	T lymphocyte
TGCGCAGAGCAGATCG_BRONCHO_58	Lung Tumor	3022.05	1219	1.33826	9	9	MAST cell
TGCGCAGAGCCCTAAT_BRONCHO_58	Lung Tumor	2659.25	879	1.85247	1	1	Myeloid cell
AATCGGTTCGGCGCAT_BRONCHO_58	Lung Tumor	2425.09	963	2.13172	0	0	T lymphocyte
ACACCAAAGAGTTGGC_BRONCHO_58	Lung Tumor	2465.77	841	1.96654	2	2	T lymphocyte
ACACCAAAGTCCCACG_BRONCHO_58	Lung Tumor	2536.96	997	1.88283	4	4	B lymphocyte
ACACCAACAGCGATCC_BRONCHO_58	Lung Tumor	3845.79	3766	1.53533	17	17	Epithelial
ACACCAATCAGAGGTG_BRONCHO_58	Lung Tumor	2545.26	858	2.30974	5	5	NK cell
ACACCAATCCAGAGGA_BRONCHO_58	Lung Tumor	2273.47	629	0.134328	10	10	Myeloid cell
ACACCAATCTTCAACT_BRONCHO_58	Lung Tumor	4271.47	4268	1.1884	1	1	Myeloid cell
ACACCCTAGAATGTGT_BRONCHO_58	Lung Tumor	2516.77	1025	1.95845	0	0	T lymphocyte
ACACCCTAGGAATGGA_BRONCHO_58	Lung Tumor	2377.86	676	2.41709	2	2	T lymphocyte
ACACCCTCAAACCTAC_BRONCHO_58	Lung Tumor	2764.58	1107	1.46969	0	0	T lymphocyte
ACACCCTGTCAAGCGA_BRONCHO_58	Lung Tumor	2727.75	967	2.10368	1	1	Myeloid cell
ACACCCTTCCGCAAGC_BRONCHO_58	Lung Tumor	4182.84	4536	1.16053	1	1	Myeloid cell
ACACCCTTCTTATCTG_BRONCHO_58	Lung Tumor	1948.28	622	1.96738	8	8	Epithelial
ACACCGGAGAATGTGT_BRONCHO_58	Lung Tumor	3018.66	1017	1.73389	2	2	T lymphocyte
ACACCGGAGAGCTGGT_BRONCHO_58	Lung Tumor	2862.21	904	1.26602	0	0	T lymphocyte
ACACCGGAGCTTATCG_BRONCHO_58	Lung Tumor	2351.62	759	0.103784	8	8	Epithelial
ACACCGGAGCTTTGGT_BRONCHO_58	Lung Tumor	2172.48	625	2.54122	2	2	T lymphocyte
ACACCGGCACCAGTTA_BRONCHO_58	Lung Tumor	2495.81	895	1.61721	9	9	MAST cell
ACACCGGCACTACAGT_BRONCHO_58	Lung Tumor	2481.14	695	2.10116	0	0	T lymphocyte
ACACCGGGTACATCCA_BRONCHO_58	Lung Tumor	2534.81	792	1.8173	2	2	T lymphocyte
ACACCGGGTCGGCATC_BRONCHO_58	Lung Tumor	2458.1	867	2.0972	2	2	T lymphocyte
ACACCGGGTCTCATCC_BRONCHO_58	Lung Tumor	4609.53	4434	1.14202	1	1	Myeloid cell
ACACCGGGTTATCGGT_BRONCHO_58	Lung Tumor	3444.63	1543	1.33168	9	9	MAST cell
ACACCGGTCAATCTCT_BRONCHO_58	Lung Tumor	2473.84	818	1.35485	2	2	T lymphocyte
ACACTGAAGTGTCCAT_BRONCHO_58	Lung Tumor	1204.17	277	0.799087	8	8	Epithelial
ACACTGACAAGCCGCT_BRONCHO_58	Lung Tumor	3206.87	1241	1.61221	1	1	Myeloid cell
ACACTGAGTAAGTTCC_BRONCHO_58	Lung Tumor	4440.37	5328	1.1372	17	17	Epithelial
ACACTGAGTCTCACCT_BRONCHO_58	Lung Tumor	2355.48	708	1.84185	9	9	MAST cell
ACACTGAGTTATTCTC_BRONCHO_58	Lung Tumor	2296.5	785	2.12972	4	4	B lymphocyte
ACACTGATCCGTACAA_BRONCHO_58	Lung Tumor	4659.18	3667	1.1538	1	1	Myeloid cell
ACAGCCGCACATTTCT_BRONCHO_58	Lung Tumor	3514.52	1632	1.32425	1	1	Myeloid cell
ACAGCCGCACGGTAAG_BRONCHO_58	Lung Tumor	2307.58	676	2.07049	5	5	NK cell
ACAGCCGGTACTTAGC_BRONCHO_58	Lung Tumor	2637.41	850	1.38288	2	2	T lymphocyte
ACAGCCGGTAGAGCTG_BRONCHO_58	Lung Tumor	2733.58	841	2.08029	2	2	T lymphocyte
ACAGCCGTCTGGAGCC_BRONCHO_58	Lung Tumor	3111.4	1358	1.59696	1	1	Myeloid cell
ACAGCTAAGCAGATCG_BRONCHO_58	Lung Tumor	3959.83	2817	1.20173	17	17	Epithelial
ACAGCTAAGGAGTTTA_BRONCHO_58	Lung Tumor	2873.07	984	1.32456	0	0	T lymphocyte
ACAGCTACAACTGGCC_BRONCHO_58	Lung Tumor	2968.33	1245	1.14567	0	0	T lymphocyte
ACAGCTACACCAGCAC_BRONCHO_58	Lung Tumor	2815.85	1007	1.57898	0	0	T lymphocyte
ACAGCTACAGCATACT_BRONCHO_58	Lung Tumor	2421.49	802	1.81736	0	0	T lymphocyte
ACAGCTAGTGGCCCTA_BRONCHO_58	Lung Tumor	2636.77	869	1.78511	2	2	T lymphocyte
ACATACGCAAATCCGT_BRONCHO_58	Lung Tumor	2484.59	973	1.92085	0	0	T lymphocyte
ACATACGCAAGTTCTG_BRONCHO_58	Lung Tumor	2312.38	731	1.87966	0	0	T lymphocyte
ACATACGCAGACGCTC_BRONCHO_58	Lung Tumor	2898.44	989	1.427	2	2	T lymphocyte
ACATACGCAGCGTCCA_BRONCHO_58	Lung Tumor	2565.72	812	1.17191	0	0	T lymphocyte
ACATACGCATGTCTCC_BRONCHO_58	Lung Tumor	2588.42	1030	1.83578	4	4	B lymphocyte
ACATACGGTATCACCA_BRONCHO_58	Lung Tumor	2560.94	745	2.0932	8	8	Epithelial
ACATACGGTCACCTAA_BRONCHO_58	Lung Tumor	4748.96	4368	0.823988	17	17	Epithelial
ACATACGTCAACACGT_BRONCHO_58	Lung Tumor	3064.46	1388	1.72088	9	9	MAST cell
ACATACGTCTTTACGT_BRONCHO_58	Lung Tumor	4226.19	2943	1.12028	1	1	Myeloid cell
ACATCAGCATTACGAC_BRONCHO_58	Lung Tumor	2794.52	1060	1.32763	2	2	T lymphocyte
ACATCAGGTCGCATAT_BRONCHO_58	Lung Tumor	4186.63	2905	1.35224	17	17	Epithelial
ACATCAGGTCTTCTCG_BRONCHO_58	Lung Tumor	2671.55	1045	2.14537	4	4	B lymphocyte
ACATCAGGTTACTGAC_BRONCHO_58	Lung Tumor	2596.84	814	1.63241	0	0	T lymphocyte
ACATGGTAGCATCATC_BRONCHO_58	Lung Tumor	2793.98	904	1.4628	5	5	NK cell
ACATGGTCACAAGTAA_BRONCHO_58	Lung Tumor	2158.02	575	2.61877	2	2	T lymphocyte
ACATGGTCAGGTCTCG_BRONCHO_58	Lung Tumor	2825.44	1030	0.148732	8	8	Epithelial
ACATGGTCAGTGACAG_BRONCHO_58	Lung Tumor	2835.46	878	1.43859	2	2	T lymphocyte
ACATGGTGTAAAGGAG_BRONCHO_58	Lung Tumor	2777.15	913	1.53811	0	0	T lymphocyte
ACATGGTGTCTCTTTA_BRONCHO_58	Lung Tumor	2698.81	925	1.77965	0	0	T lymphocyte
ACATGGTTCCGCGGTA_BRONCHO_58	Lung Tumor	4320.41	3427	1.29455	1	1	Myeloid cell
ACCAGTAAGTTGTCGT_BRONCHO_58	Lung Tumor	2556.11	872	1.93896	2	2	T lymphocyte
ACCAGTAGTTCGGCAC_BRONCHO_58	Lung Tumor	4081.24	3813	1.3165	17	17	Epithelial
ACCAGTATCACTATTC_BRONCHO_58	Lung Tumor	2902.5	1036	1.2628	0	0	T lymphocyte
ACCCACTCAAGCTGAG_BRONCHO_58	Lung Tumor	2267.9	611	2.00247	2	2	T lymphocyte
ACCCACTGTACATCCA_BRONCHO_58	Lung Tumor	3330.21	1854	1.48105	1	1	Myeloid cell
ACCGTAAAGAGAACAG_BRONCHO_58	Lung Tumor	2561.64	940	2.02103	4	4	B lymphocyte
ACCGTAAAGTGTACCT_BRONCHO_58	Lung Tumor	2165.22	594	2.14794	9	9	MAST cell
ACCGTAACAGACGCAA_BRONCHO_58	Lung Tumor	3341.87	1362	1.48956	19	19	Epithelial
ACCGTAAGTCTCTCTG_BRONCHO_58	Lung Tumor	3524.81	1649	1.11312	9	9	MAST cell
ACCGTAAGTCTGGAGA_BRONCHO_58	Lung Tumor	2649.69	868	1.63629	5	5	NK cell
ACCGTAAGTGTGAATA_BRONCHO_58	Lung Tumor	2476.71	860	2.2501	0	0	T lymphocyte
ACCGTAAGTTAAGAAC_BRONCHO_58	Lung Tumor	4266.21	2754	1.17897	1	1	Myeloid cell
ACCGTAAGTTCCGTCT_BRONCHO_58	Lung Tumor	4564.92	5474	1.13351	17	17	Epithelial
ACCGTAATCCCTGACT_BRONCHO_58	Lung Tumor	2565.01	796	1.71862	2	2	T lymphocyte
ACCTTTAAGCTACCTA_BRONCHO_58	Lung Tumor	3056.36	1116	1.47118	0	0	T lymphocyte
ACCTTTAAGGAGTACC_BRONCHO_58	Lung Tumor	2561.2	743	2.10515	2	2	T lymphocyte
ACCTTTAAGTCTTGCA_BRONCHO_58	Lung Tumor	3489.67	1670	1.51978	1	1	Myeloid cell
ACCTTTACACCAGGTC_BRONCHO_58	Lung Tumor	4662.95	3368	1.07088	11	11	Fibroblast
ACCTTTACAGGGCATA_BRONCHO_58	Lung Tumor	1940.41	2330	1.55518	13	13	B lymphocyte
ACCTTTACATATACGC_BRONCHO_58	Lung Tumor	2608.73	848	1.78621	2	2	T lymphocyte
ACCTTTATCCTTTACA_BRONCHO_58	Lung Tumor	2586.12	885	1.69659	2	2	T lymphocyte
ACCTTTATCGAACGGA_BRONCHO_58	Lung Tumor	4599.06	6082	1.30502	17	17	Epithelial
ACGAGCCAGCAAATCA_BRONCHO_58	Lung Tumor	3844.16	2441	1.46043	1	1	Myeloid cell
ACGAGCCAGCTAGTGG_BRONCHO_58	Lung Tumor	2925.58	992	1.34997	2	2	T lymphocyte
ACGAGCCAGGACTGGT_BRONCHO_58	Lung Tumor	2882.48	965	1.67831	2	2	T lymphocyte
ACGAGCCAGTGTGAAT_BRONCHO_58	Lung Tumor	4205.81	7847	0.970862	17	17	Epithelial
ACGAGCCCACCCAGTG_BRONCHO_58	Lung Tumor	4164.07	3209	1.17533	1	1	Myeloid cell
ACGAGCCGTAGCACGA_BRONCHO_58	Lung Tumor	4321.81	3741	1.21552	1	1	Myeloid cell
ACGAGGATCTCACATT_BRONCHO_58	Lung Tumor	4878.63	5160	0.947911	17	17	Epithelial
ACGATACAGAAGGTTT_BRONCHO_58	Lung Tumor	3237.58	1368	2.21223	1	1	Myeloid cell
ACGATACAGTTTAGGA_BRONCHO_58	Lung Tumor	4066.84	2957	1.08203	17	17	Epithelial
ACGATACCAAGTAATG_BRONCHO_58	Lung Tumor	1806.23	719	3.1866	8	8	Epithelial
ACGATACGTCAATGTC_BRONCHO_58	Lung Tumor	2617.55	819	1.32613	2	2	T lymphocyte
ACGATACGTCTCACCT_BRONCHO_58	Lung Tumor	2881.31	1064	1.3369	2	2	T lymphocyte
ACGATACGTTGTCTTT_BRONCHO_58	Lung Tumor	4201	3833	1.30389	17	17	Epithelial
ACGATACTCGCATGGC_BRONCHO_58	Lung Tumor	4335.45	3461	1.13633	10	10	Myeloid cell
ACGATACTCTGGTATG_BRONCHO_58	Lung Tumor	2754.5	1027	1.62671	0	0	T lymphocyte
ACGATGTAGTATCGAA_BRONCHO_58	Lung Tumor	3035.94	1077	1.86389	2	2	T lymphocyte
ACGATGTCAGCTGTGC_BRONCHO_58	Lung Tumor	4487.6	4567	1.24267	17	17	Epithelial
ACGATGTGTATATCCG_BRONCHO_58	Lung Tumor	2484.97	968	2.16733	0	0	T lymphocyte
ACGATGTGTCTAAAGA_BRONCHO_58	Lung Tumor	3421.84	2052	1.34083	1	1	Myeloid cell
ACGATGTTCCGCGGTA_BRONCHO_58	Lung Tumor	2689.92	902	1.74499	5	5	NK cell
ACGCAGCAGACCGGAT_BRONCHO_58	Lung Tumor	2668.73	852	1.71971	5	5	NK cell
ACGCAGCAGACTAGAT_BRONCHO_58	Lung Tumor	3872.27	3740	1.14903	17	17	Epithelial
ACGCAGCGTCCAGTTA_BRONCHO_58	Lung Tumor	2215.09	613	1.90103	2	2	T lymphocyte
ACGCAGCGTCGAGTTT_BRONCHO_58	Lung Tumor	3481.35	1482	0.96968	1	1	Myeloid cell
ACGCAGCGTCGCGGTT_BRONCHO_58	Lung Tumor	4388.13	3361	1.19997	7	7	Epithelial
ACGCAGCGTGTGACGA_BRONCHO_58	Lung Tumor	2025.33	556	1.98219	8	8	Epithelial
ACGCCAGCAAGGACTG_BRONCHO_58	Lung Tumor	2747.82	962	1.418	0	0	T lymphocyte
ACGCCAGCAGCCTTTC_BRONCHO_58	Lung Tumor	3197.31	1207	1.19271	2	2	T lymphocyte
ACGCCAGCAGCTGCAC_BRONCHO_58	Lung Tumor	2503.39	765	0.107211	8	8	Epithelial
ACGCCAGGTGACAAAT_BRONCHO_58	Lung Tumor	2968.1	991	1.40563	2	2	T lymphocyte
ACGCCAGGTGAGGGAG_BRONCHO_58	Lung Tumor	2977.69	1027	1.56737	2	2	T lymphocyte
ACGCCAGGTGTGCCTG_BRONCHO_58	Lung Tumor	2601.91	873	1.63039	0	0	T lymphocyte
ACGCCAGTCGAGAACG_BRONCHO_58	Lung Tumor	2821.31	979	1.41611	0	0	T lymphocyte
ACGCCAGTCTGTCTAT_BRONCHO_58	Lung Tumor	3683.14	1565	1.08808	2	2	T lymphocyte
ACGCCAGTCTTCCTTC_BRONCHO_58	Lung Tumor	2818.85	999	1.44489	0	0	T lymphocyte
ACGCCAGTCTTTACAC_BRONCHO_58	Lung Tumor	2451.7	775	0.103565	8	8	Epithelial
ACGCCGAAGCCACTAT_BRONCHO_58	Lung Tumor	2847.34	983	1.30398	0	0	T lymphocyte
ACGCCGACACGTCTCT_BRONCHO_58	Lung Tumor	2665.06	850	0.324425	8	8	Epithelial
ACGCCGACAGTCAGCC_BRONCHO_58	Lung Tumor	2749.95	906	2.07366	2	2	T lymphocyte
ACGCCGAGTAAGTAGT_BRONCHO_58	Lung Tumor	3511.73	2049	1.34994	1	1	Myeloid cell
ACGCCGAGTCCGACGT_BRONCHO_58	Lung Tumor	2615.13	880	2.02756	5	5	NK cell
ACGCCGAGTGATGATA_BRONCHO_58	Lung Tumor	2289.12	761	1.91357	2	2	T lymphocyte
ACGGAGAAGCTAGTCT_BRONCHO_58	Lung Tumor	3251.03	1595	1.8762	17	17	Epithelial
ACGGAGAAGGGCTTGA_BRONCHO_58	Lung Tumor	2840.59	915	1.70329	2	2	T lymphocyte
ACGGAGAGTACAGCAG_BRONCHO_58	Lung Tumor	3226.93	1424	1.45592	9	9	MAST cell
ACGGAGAGTTCCCTTG_BRONCHO_58	Lung Tumor	3564.77	1678	1.23711	0	0	T lymphocyte
ACGGAGATCAAGATCC_BRONCHO_58	Lung Tumor	2600.62	859	2.93296	0	0	T lymphocyte
ACGGAGATCAAGGCTT_BRONCHO_58	Lung Tumor	2645.48	846	1.71898	2	2	T lymphocyte
ACGGAGATCACCATAG_BRONCHO_58	Lung Tumor	2249.85	734	2.28157	4	4	B lymphocyte
ACGGAGATCCACTCCA_BRONCHO_58	Lung Tumor	2021.28	554	2.22107	9	9	MAST cell
ACGGAGATCGTCCGTT_BRONCHO_58	Lung Tumor	4077.69	3742	1.21443	17	17	Epithelial
ACGGCCACACATTCGA_BRONCHO_58	Lung Tumor	2516.14	930	1.92242	0	0	T lymphocyte
ACGGCCACACTGTGTA_BRONCHO_58	Lung Tumor	1455.73	371	1.68056	10	10	Myeloid cell
ACGGCCACATGGTCTA_BRONCHO_58	Lung Tumor	2644.64	844	1.65564	2	2	T lymphocyte
ACGGCCAGTAAGGGAA_BRONCHO_58	Lung Tumor	2873.9	945	1.32447	2	2	T lymphocyte
ACGGCCAGTCGGGTCT_BRONCHO_58	Lung Tumor	4008.98	3703	1.29105	17	17	Epithelial
ACGGCCAGTTGCTCCT_BRONCHO_58	Lung Tumor	2610.82	894	1.71315	5	5	NK cell
ACGGCCATCGTACCGG_BRONCHO_58	Lung Tumor	2330.31	774	1.90351	4	4	B lymphocyte
ACGGGCTGTCGTGGCT_BRONCHO_58	Lung Tumor	1894.55	521	0.519172	8	8	Epithelial
ACGGGCTGTCTCTCGT_BRONCHO_58	Lung Tumor	2523.16	814	1.93147	2	2	T lymphocyte
ACGGGCTTCAACACAC_BRONCHO_58	Lung Tumor	2019.03	634	3.57377	8	8	Epithelial
ACGGGCTTCATCTGTT_BRONCHO_58	Lung Tumor	2663.76	954	1.54607	0	0	T lymphocyte
ACGGGCTTCTACCAGA_BRONCHO_58	Lung Tumor	2977.5	1159	0.352481	10	10	Myeloid cell
ACGGGCTTCTCACATT_BRONCHO_58	Lung Tumor	2622.62	795	1.58167	2	2	T lymphocyte
TGCGCAGCAGTTCATG_BRONCHO_58	Lung Tumor	3532.91	1688	1.39607	10	10	Myeloid cell
TGCGCAGGTATGGTTC_BRONCHO_58	Lung Tumor	2441.69	762	1.83757	2	2	T lymphocyte
TGCGCAGGTCTGCGGT_BRONCHO_58	Lung Tumor	2536.84	930	2.05411	4	4	B lymphocyte
TGCGCAGGTGACAAAT_BRONCHO_58	Lung Tumor	2518.26	818	1.84584	0	0	T lymphocyte
TGCGCAGGTGGTGTAG_BRONCHO_58	Lung Tumor	4449.26	3642	1.06876	0	0	T lymphocyte
TGCGCAGGTTCACCTC_BRONCHO_58	Lung Tumor	2567.46	882	1.77012	0	0	T lymphocyte
TGCGCAGGTTTGGCGC_BRONCHO_58	Lung Tumor	2531.18	884	0.465058	8	8	Epithelial
TGCGCAGTCATACGGT_BRONCHO_58	Lung Tumor	3827.23	2173	0.1623	8	8	Epithelial
TGCGCAGTCTTCGGTC_BRONCHO_58	Lung Tumor	2633.65	961	0.824829	8	8	Epithelial
TGCGGGTGTTCACGGC_BRONCHO_58	Lung Tumor	2632.35	821	1.76136	2	2	T lymphocyte
TGCGGGTGTTCCTCCA_BRONCHO_58	Lung Tumor	2662.71	933	1.61603	5	5	NK cell
TGCGGGTTCGCCGTGA_BRONCHO_58	Lung Tumor	4080.23	3890	1.3123	1	1	Myeloid cell
TGCGTGGAGAATAGGG_BRONCHO_58	Lung Tumor	1718.44	438	2.53334	1	1	Myeloid cell
TGCGTGGAGAGCTGCA_BRONCHO_58	Lung Tumor	2284.12	686	2.07209	2	2	T lymphocyte
TGCGTGGCAAAGGCGT_BRONCHO_58	Lung Tumor	3238.09	1360	1.47318	0	0	T lymphocyte
TGCGTGGCAATGGACG_BRONCHO_58	Lung Tumor	2367.35	817	1.94806	1	1	Myeloid cell
TGCGTGGCAGGGCATA_BRONCHO_58	Lung Tumor	3098.48	1063	1.32784	5	5	NK cell
TGCGTGGCATAACCTG_BRONCHO_58	Lung Tumor	2113.47	649	0.277872	8	8	Epithelial
TGCGTGGGTCCGTGAC_BRONCHO_58	Lung Tumor	2511.61	834	1.44594	0	0	T lymphocyte
TGCGTGGGTCTGCGGT_BRONCHO_58	Lung Tumor	2711.58	843	1.34786	2	2	T lymphocyte
TGCTACCGTGATAAAC_BRONCHO_58	Lung Tumor	2892.56	1076	2.19255	2	2	T lymphocyte
TGCTACCGTGCCTGGT_BRONCHO_58	Lung Tumor	2576.56	816	1.38733	2	2	T lymphocyte
TGCTGCTAGCTAGTGG_BRONCHO_58	Lung Tumor	2700.68	1011	1.91052	1	1	Myeloid cell
TGCTGCTCACGCTTTC_BRONCHO_58	Lung Tumor	2637	894	1.72192	1	1	Myeloid cell
TGCTGCTGTAGCTGCC_BRONCHO_58	Lung Tumor	2660.08	916	1.88722	5	5	NK cell
TGCTGCTGTGTGGCTC_BRONCHO_58	Lung Tumor	3068.2	1107	1.52835	0	0	T lymphocyte
TGCTGCTTCTGCTTGC_BRONCHO_58	Lung Tumor	2723.77	965	1.56924	0	0	T lymphocyte
TGGACGCCAGTGGGAT_BRONCHO_58	Lung Tumor	1921.27	524	2.55054	0	0	T lymphocyte
TGGACGCCATTCCTCG_BRONCHO_58	Lung Tumor	2173.25	632	3.15638	1	1	Myeloid cell
TGGACGCGTTAAGTAG_BRONCHO_58	Lung Tumor	2962.34	1073	1.46198	2	2	T lymphocyte
TGGACGCGTTCCACTC_BRONCHO_58	Lung Tumor	2609	810	1.171	2	2	T lymphocyte
TGGACGCTCAGGCGAA_BRONCHO_58	Lung Tumor	2253.86	675	2.30797	2	2	T lymphocyte
TGGCCAGAGAATTGTG_BRONCHO_58	Lung Tumor	3075.61	1085	1.69621	5	5	NK cell
TGGCCAGCACATGACT_BRONCHO_58	Lung Tumor	2691.31	1554	2.24036	1	1	Myeloid cell
TGGCCAGGTAGTAGTA_BRONCHO_58	Lung Tumor	4232.31	2470	0.922007	11	11	Fibroblast
TGGCCAGGTTAGGGTG_BRONCHO_58	Lung Tumor	703.339	232	1.75897	13	13	B lymphocyte
TGGCGCAAGTGAATTG_BRONCHO_58	Lung Tumor	4051.72	3508	1.4314	1	1	Myeloid cell
TGGCGCACATCCGGGT_BRONCHO_58	Lung Tumor	2444.56	821	1.77713	2	2	T lymphocyte
TGGCGCAGTACTTGAC_BRONCHO_58	Lung Tumor	3068.26	1329	1.75904	4	4	B lymphocyte
TGGCGCATCCCAGGTG_BRONCHO_58	Lung Tumor	2392.28	736	2.2339	2	2	T lymphocyte
TGGCGCATCGTTGACA_BRONCHO_58	Lung Tumor	2916.27	1137	1.69969	1	1	Myeloid cell
TGGCTGGAGCAGCCTC_BRONCHO_58	Lung Tumor	2617.63	815	1.81842	2	2	T lymphocyte
TGGCTGGCATGCAACT_BRONCHO_58	Lung Tumor	2654.9	880	0.179844	8	8	Epithelial
TGGCTGGTCAGTACGT_BRONCHO_58	Lung Tumor	2808.75	974	1.6477	5	5	NK cell
TGGCTGGTCCTCGCAT_BRONCHO_58	Lung Tumor	3099.43	1144	1.7443	2	2	T lymphocyte
TGGCTGGTCTTTACAC_BRONCHO_58	Lung Tumor	2793.18	1064	1.90009	1	1	Myeloid cell
TGGGAAGCAGGGCATA_BRONCHO_58	Lung Tumor	2525.59	916	1.89352	0	0	T lymphocyte
TGGGAAGCATTCACTT_BRONCHO_58	Lung Tumor	3974.42	3123	1.39625	17	17	Epithelial
TGGGAAGGTACTCAAC_BRONCHO_58	Lung Tumor	2541.54	798	1.79206	2	2	T lymphocyte
TGGGAAGGTCCATGAT_BRONCHO_58	Lung Tumor	3080.96	1171	1.6483	11	11	Fibroblast
TGGGAAGTCTGGTTCC_BRONCHO_58	Lung Tumor	2349.51	682	2.28585	2	2	T lymphocyte
TGGGCGTAGTATGACA_BRONCHO_58	Lung Tumor	4061.7	3986	1.32775	17	17	Epithelial
TGGGCGTTCGCGGATC_BRONCHO_58	Lung Tumor	2291.77	632	1.60276	2	2	T lymphocyte
TGGGCGTTCGCTGATA_BRONCHO_58	Lung Tumor	2704.74	915	1.81828	2	2	T lymphocyte
TGGTTAGAGCAATCTC_BRONCHO_58	Lung Tumor	4663.53	8277	0.837542	17	17	Epithelial
TGGTTAGAGGCATTGG_BRONCHO_58	Lung Tumor	2808.07	1066	1.71481	0	0	T lymphocyte
TGGTTAGAGGGCTTGA_BRONCHO_58	Lung Tumor	2546.28	772	0.409538	8	8	Epithelial
TGGTTAGGTCTAGAGG_BRONCHO_58	Lung Tumor	2408.87	750	2.19102	2	2	T lymphocyte
TGGTTAGGTCTTGTCC_BRONCHO_58	Lung Tumor	2806.96	999	1.50232	0	0	T lymphocyte
TGGTTAGGTGATGCCC_BRONCHO_58	Lung Tumor	3132.31	1165	1.45917	0	0	T lymphocyte
TGGTTAGGTTCACCTC_BRONCHO_58	Lung Tumor	4777.1	3563	0.954766	11	11	Fibroblast
TGGTTCCAGAATGTGT_BRONCHO_58	Lung Tumor	2421.8	708	1.92382	2	2	T lymphocyte
TGGTTCCCAATGGACG_BRONCHO_58	Lung Tumor	2611.48	928	1.41722	2	2	T lymphocyte
TGGTTCCCACTAAGTC_BRONCHO_58	Lung Tumor	2709.25	917	1.74348	0	0	T lymphocyte
TGGTTCCGTCCTCCAT_BRONCHO_58	Lung Tumor	4422.75	5521	1.08781	17	17	Epithelial
TGGTTCCTCACATAGC_BRONCHO_58	Lung Tumor	2656.67	878	1.70882	2	2	T lymphocyte
TGGTTCCTCATAACCG_BRONCHO_58	Lung Tumor	2779.05	1033	1.83453	0	0	T lymphocyte
TGGTTCCTCCACTCCA_BRONCHO_58	Lung Tumor	2917.16	1025	1.4347	0	0	T lymphocyte
TGTATTCCACATCTTT_BRONCHO_58	Lung Tumor	2503.26	804	1.90017	2	2	T lymphocyte
TGTATTCGTTACGACT_BRONCHO_58	Lung Tumor	2674.97	931	1.57647	2	2	T lymphocyte
TGTATTCGTTCAGGCC_BRONCHO_58	Lung Tumor	4456	4357	1.46432	17	17	Epithelial
TGTATTCTCGCCAAAT_BRONCHO_58	Lung Tumor	1319.11	358	4.0992	8	8	Epithelial
TGTATTCTCGGCGCTA_BRONCHO_58	Lung Tumor	4046.54	1852	1.06054	2	2	T lymphocyte
TGTCCCAAGCTGCGAA_BRONCHO_58	Lung Tumor	2173.42	638	2.36216	0	0	T lymphocyte
TGTCCCAAGGATATAC_BRONCHO_58	Lung Tumor	3299.04	1522	1.6662	1	1	Myeloid cell
TGTCCCAAGTGACATA_BRONCHO_58	Lung Tumor	3160.93	1165	1.90296	1	1	Myeloid cell
TGTCCCACACAGAGGT_BRONCHO_58	Lung Tumor	2473.65	1034	2.21102	0	0	T lymphocyte
TGTCCCAGTATGCTTG_BRONCHO_58	Lung Tumor	3186.46	1293	1.5561	11	11	Fibroblast
TGTCCCAGTCAGATAA_BRONCHO_58	Lung Tumor	1823.57	491	2.47866	4	4	B lymphocyte
TGTCCCAGTGTGGTTT_BRONCHO_58	Lung Tumor	2733.46	890	1.53439	2	2	T lymphocyte
TGTCCCAGTTCGAATC_BRONCHO_58	Lung Tumor	3138.06	1176	1.46123	0	0	T lymphocyte
TGTCCCATCTAGCACA_BRONCHO_58	Lung Tumor	2450.92	812	1.96792	0	0	T lymphocyte
TGTGGTAAGAGTACAT_BRONCHO_58	Lung Tumor	3175.03	1215	1.467	0	0	T lymphocyte
TGTGGTAAGATATACG_BRONCHO_58	Lung Tumor	2403.94	746	2.31696	1	1	Myeloid cell
TGTGGTAAGTCATGCT_BRONCHO_58	Lung Tumor	2456.11	796	1.55806	2	2	T lymphocyte
TGTGGTAAGTCTCAAC_BRONCHO_58	Lung Tumor	3233.27	1238	1.30506	2	2	T lymphocyte
TGTGGTACAAGAAAGG_BRONCHO_58	Lung Tumor	2965.4	1348	1.79277	1	1	Myeloid cell
TGTGGTACAGTTCATG_BRONCHO_58	Lung Tumor	3480.92	1377	1.28254	0	0	T lymphocyte
TGTGGTACATGGTCTA_BRONCHO_58	Lung Tumor	1717.38	2008	1.77102	13	13	B lymphocyte
TGTGGTAGTTGGGACA_BRONCHO_58	Lung Tumor	2555.82	784	0	10	10	Myeloid cell
TGTGTTTTCACGGTTA_BRONCHO_58	Lung Tumor	2700.16	893	2.12369	2	2	T lymphocyte
TGTGTTTTCACTTCAT_BRONCHO_58	Lung Tumor	2424.14	871	2.09206	1	1	Myeloid cell
TGTGTTTTCGCACTCT_BRONCHO_58	Lung Tumor	2492.25	768	1.55874	2	2	T lymphocyte
TGTTCCGAGTGTGAAT_BRONCHO_58	Lung Tumor	2579.85	849	1.77122	5	5	NK cell
TGTTCCGCATTTGCCC_BRONCHO_58	Lung Tumor	4690.72	4370	1.23144	17	17	Epithelial
TGTTCCGGTAGCTTGT_BRONCHO_58	Lung Tumor	2709.73	905	1.78984	2	2	T lymphocyte
TGTTCCGGTATGCTTG_BRONCHO_58	Lung Tumor	2632.43	838	1.68087	2	2	T lymphocyte
TGTTCCGGTTCCCGAG_BRONCHO_58	Lung Tumor	4875.53	3783	0.891945	11	11	Fibroblast
TGTTCCGGTTTGACAC_BRONCHO_58	Lung Tumor	3200.53	1237	1.36981	2	2	T lymphocyte
TGTTCCGTCCGTCAAA_BRONCHO_58	Lung Tumor	1764.87	434	0	8	8	Epithelial
TTAACTCAGACTAGAT_BRONCHO_58	Lung Tumor	2638.35	876	1.71676	2	2	T lymphocyte
TTAACTCAGATTACCC_BRONCHO_58	Lung Tumor	2670.19	851	1.60061	5	5	NK cell
TTAACTCAGCCAGTTT_BRONCHO_58	Lung Tumor	2295.35	728	1.81082	0	0	T lymphocyte
TTAACTCAGTTTGCGT_BRONCHO_58	Lung Tumor	2798.94	937	1.6089	2	2	T lymphocyte
TTAACTCCAAATACAG_BRONCHO_58	Lung Tumor	1186.35	276	3.30999	8	8	Epithelial
TTAACTCCAATGTAAG_BRONCHO_58	Lung Tumor	4150.92	3428	1.38478	1	1	Myeloid cell
TTAACTCCACTGAAGG_BRONCHO_58	Lung Tumor	2118.98	548	0.15943	10	10	Myeloid cell
TTAACTCCAGTTAACC_BRONCHO_58	Lung Tumor	3078.88	1126	1.39482	2	2	T lymphocyte
TTAACTCGTCAATGTC_BRONCHO_58	Lung Tumor	4331.03	5637	1.12616	17	17	Epithelial
TTAACTCGTCGGCATC_BRONCHO_58	Lung Tumor	3260.56	1216	1.30303	0	0	T lymphocyte
TTAACTCGTCTCTTTA_BRONCHO_58	Lung Tumor	3575.95	1828	1.54524	1	1	Myeloid cell
TTAACTCGTTACGGAG_BRONCHO_58	Lung Tumor	1797.61	470	0.174374	8	8	Epithelial
TTAACTCGTTGACGTT_BRONCHO_58	Lung Tumor	2836.53	1096	1.63013	0	0	T lymphocyte
TTAACTCTCAGAGACG_BRONCHO_58	Lung Tumor	2157.13	604	2.08639	2	2	T lymphocyte
TTAACTCTCCGTTGTC_BRONCHO_58	Lung Tumor	2340.21	1041	1.98914	13	13	B lymphocyte
TTAACTCTCTCGCTTG_BRONCHO_58	Lung Tumor	2787.9	998	1.74997	0	0	T lymphocyte
TTAGGACAGAGCCCAA_BRONCHO_58	Lung Tumor	3450.83	1314	1.41145	0	0	T lymphocyte
TTAGGACAGCTAACTC_BRONCHO_58	Lung Tumor	3014.49	1097	1.54241	2	2	T lymphocyte
TTAGGACCACCTGGTG_BRONCHO_58	Lung Tumor	2633.28	927	1.89366	5	5	NK cell
TTAGGACGTATGCTTG_BRONCHO_58	Lung Tumor	4052.12	2352	1.09425	16	16	Endothelial
TTAGGACGTTCTGTTT_BRONCHO_58	Lung Tumor	4205.32	7877	0.807417	17	17	Epithelial
TTAGGCAAGAAGGGTA_BRONCHO_58	Lung Tumor	3034.18	1079	1.43077	0	0	T lymphocyte
TTAGGCAGTAAAGTCA_BRONCHO_58	Lung Tumor	2051.61	790	2.3922	4	4	B lymphocyte
TTAGGCAGTAATAGCA_BRONCHO_58	Lung Tumor	2856.75	975	1.57822	5	5	NK cell
TTAGGCATCACGGTTA_BRONCHO_58	Lung Tumor	4429	3204	1.24831	1	1	Myeloid cell
TTAGTTCAGGACTGGT_BRONCHO_58	Lung Tumor	3994.89	4839	1.32642	17	17	Epithelial
TTAGTTCAGGCTAGCA_BRONCHO_58	Lung Tumor	4088.77	2439	0.869451	1	1	Myeloid cell
TTAGTTCCACATTAGC_BRONCHO_58	Lung Tumor	2561.44	864	1.61032	1	1	Myeloid cell
TTAGTTCCAGTTCATG_BRONCHO_58	Lung Tumor	2576.33	856	1.70006	0	0	T lymphocyte
TTAGTTCTCAATAAGG_BRONCHO_58	Lung Tumor	3806.8	1975	1.34194	16	16	Endothelial
TTAGTTCTCCATGAGT_BRONCHO_58	Lung Tumor	2169.16	585	1.22799	5	5	NK cell
TTAGTTCTCCGAATGT_BRONCHO_58	Lung Tumor	3144.3	1723	1.13385	1	1	Myeloid cell
TTAGTTCTCTATCGCC_BRONCHO_58	Lung Tumor	4041.94	5930	1.11811	17	17	Epithelial
TTATGCTAGCAGACTG_BRONCHO_58	Lung Tumor	4530.04	5960	1.06398	17	17	Epithelial
TTATGCTAGGCTACGA_BRONCHO_58	Lung Tumor	3474.4	1303	1.22755	2	2	T lymphocyte
TTATGCTAGGGTTTCT_BRONCHO_58	Lung Tumor	3297.8	1326	1.24764	0	0	T lymphocyte
TTATGCTTCTCTAGGA_BRONCHO_58	Lung Tumor	2853.04	1078	1.42613	0	0	T lymphocyte
TTCCCAGAGAGGTAGA_BRONCHO_58	Lung Tumor	4710.57	3748	1.12428	16	16	Endothelial
TTCCCAGAGTTCGATC_BRONCHO_58	Lung Tumor	2863.73	952	1.59446	0	0	T lymphocyte
TTCCCAGCACCAGGTC_BRONCHO_58	Lung Tumor	2453.63	805	2.48067	2	2	T lymphocyte
TTCCCAGCACGCATCG_BRONCHO_58	Lung Tumor	1678.94	419	0.254128	8	8	Epithelial
TTCCCAGCATCAGTCA_BRONCHO_58	Lung Tumor	4360.32	4555	1.1049	17	17	Epithelial
TTCCCAGGTAGCGTAG_BRONCHO_58	Lung Tumor	4198.95	4157	1.02225	17	17	Epithelial
TTCCCAGGTATGAATG_BRONCHO_58	Lung Tumor	2718.03	2065	1.33404	13	13	B lymphocyte
TTCCCAGTCTGTCTAT_BRONCHO_58	Lung Tumor	2625.37	869	2.46034	1	1	Myeloid cell
TTCCCAGTCTTACCGC_BRONCHO_58	Lung Tumor	3058.5	1146	1.673	0	0	T lymphocyte
TTCGGTCAGATGTCGG_BRONCHO_58	Lung Tumor	4341.31	3171	1.23519	1	1	Myeloid cell
TTCGGTCCAAGTTAAG_BRONCHO_58	Lung Tumor	3777.47	2704	1.10604	1	1	Myeloid cell
TTCGGTCGTCCGAATT_BRONCHO_58	Lung Tumor	2654.13	928	1.90637	1	1	Myeloid cell
TTCGGTCGTGCCTGCA_BRONCHO_58	Lung Tumor	3075.43	1254	1.14035	11	11	Fibroblast
TTCGGTCGTGCCTGTG_BRONCHO_58	Lung Tumor	1856.71	602	2.54979	8	8	Epithelial
TTCGGTCGTTAGAACA_BRONCHO_58	Lung Tumor	2609.74	833	1.51608	2	2	T lymphocyte
TTCGGTCTCACAACGT_BRONCHO_58	Lung Tumor	2357.06	776	2.24418	4	4	B lymphocyte
TTCGGTCTCATAGCAC_BRONCHO_58	Lung Tumor	3408.63	1879	0.326471	8	8	Epithelial
TTCTACAAGACATAAC_BRONCHO_58	Lung Tumor	2903	961	1.35219	2	2	T lymphocyte
TTCTACAAGGCACATG_BRONCHO_58	Lung Tumor	3679.29	1588	1.29098	2	2	T lymphocyte
TTCTACAAGTCAAGCG_BRONCHO_58	Lung Tumor	2664.14	935	1.21123	0	0	T lymphocyte
TTCTACAAGTGCAAGC_BRONCHO_58	Lung Tumor	2740.33	988	0.0767421	8	8	Epithelial
TTCTACAGTCCGAATT_BRONCHO_58	Lung Tumor	2133.55	762	2.09932	0	0	T lymphocyte
TTCTACAGTGGTTTCA_BRONCHO_58	Lung Tumor	3504.45	2170	1.55526	1	1	Myeloid cell
TTCTACATCCGCATAA_BRONCHO_58	Lung Tumor	3235.91	1192	1.50816	2	2	T lymphocyte
TTCTCAACAGTCAGAG_BRONCHO_58	Lung Tumor	2778.37	978	1.65865	0	0	T lymphocyte
TTCTCAACATGTCCTC_BRONCHO_58	Lung Tumor	2619.23	1031	1.82116	9	9	MAST cell
TTCTCAAGTCTCGTTC_BRONCHO_58	Lung Tumor	2819.39	960	1.53914	2	2	T lymphocyte
TTCTCAAGTGGCAAAC_BRONCHO_58	Lung Tumor	4056.51	2234	1.15111	16	16	Endothelial
TTCTCAATCAAACCGT_BRONCHO_58	Lung Tumor	3529.42	1485	0.961058	0	0	T lymphocyte
TTCTCAATCCAGGGCT_BRONCHO_58	Lung Tumor	2469.37	791	1.77731	0	0	T lymphocyte
TTCTCAATCTTTAGTC_BRONCHO_58	Lung Tumor	2160.32	829	1.51311	0	0	T lymphocyte
TTCTCCTAGACCTTTG_BRONCHO_58	Lung Tumor	4321.4	2562	1.1491	11	11	Fibroblast
TTCTCCTAGCAGGCTA_BRONCHO_58	Lung Tumor	2335.58	670	0	8	8	Epithelial
TTCTCCTCAGCCACCA_BRONCHO_58	Lung Tumor	3523.46	1809	1.26781	1	1	Myeloid cell
TTCTCCTCAGCTTCGG_BRONCHO_58	Lung Tumor	2185.94	720	1.03154	8	8	Epithelial
TTCTCCTCATTAGGCT_BRONCHO_58	Lung Tumor	2423.01	737	1.88988	1	1	Myeloid cell
TTCTCCTGTCCGACGT_BRONCHO_58	Lung Tumor	2666.4	919	1.80266	4	4	B lymphocyte
TTCTCCTTCCTAGTGA_BRONCHO_58	Lung Tumor	2752.05	1078	0.709306	8	8	Epithelial
TTCTCCTTCGGATGTT_BRONCHO_58	Lung Tumor	4000.12	3780	1.28545	17	17	Epithelial
TTCTCCTTCTGCCCTA_BRONCHO_58	Lung Tumor	3893.97	1713	1.28718	0	0	T lymphocyte
TTCTTAGAGCTCTCGG_BRONCHO_58	Lung Tumor	4457.4	3774	0.928023	17	17	Epithelial
TTCTTAGAGTACGTTC_BRONCHO_58	Lung Tumor	4144.39	4423	1.23857	17	17	Epithelial
TTCTTAGCAGCCACCA_BRONCHO_58	Lung Tumor	1831.94	500	0.211919	8	8	Epithelial
TTCTTAGGTAGTGAAT_BRONCHO_58	Lung Tumor	3738.99	1541	1.3512	0	0	T lymphocyte
TTCTTAGGTGATAAGT_BRONCHO_58	Lung Tumor	4405.78	2947	1.45561	16	16	Endothelial
TTCTTAGGTGCTAGCC_BRONCHO_58	Lung Tumor	2779	956	1.60563	0	0	T lymphocyte
TTCTTAGGTTGACGTT_BRONCHO_58	Lung Tumor	3633.84	1840	1.6029	1	1	Myeloid cell
TTCTTAGTCACTTACT_BRONCHO_58	Lung Tumor	4071.52	2448	1.55217	1	1	Myeloid cell
TTCTTAGTCCGAAGAG_BRONCHO_58	Lung Tumor	3318.43	1251	1.2768	2	2	T lymphocyte
TTCTTAGTCGGAGGTA_BRONCHO_58	Lung Tumor	2403.94	725	1.87873	2	2	T lymphocyte
TTCTTAGTCTGGTTCC_BRONCHO_58	Lung Tumor	2111.94	556	2.36222	1	1	Myeloid cell
TTGAACGAGCTATGCT_BRONCHO_58	Lung Tumor	2410.85	740	2.02111	0	0	T lymphocyte
TTGAACGAGGCAAAGA_BRONCHO_58	Lung Tumor	2422.58	728	1.07474	8	8	Epithelial
TTGAACGCACATCTTT_BRONCHO_58	Lung Tumor	3233.42	1352	1.48085	0	0	T lymphocyte
TTGAACGGTACCTACA_BRONCHO_58	Lung Tumor	2683.22	967	1.81127	0	0	T lymphocyte
TTGAACGGTCAAAGCG_BRONCHO_58	Lung Tumor	2225.45	667	1.62955	2	2	T lymphocyte
TTGAACGGTCATCGGC_BRONCHO_58	Lung Tumor	4289.86	5281	1.20589	17	17	Epithelial
TTGAACGGTTATTCTC_BRONCHO_58	Lung Tumor	3876.93	2056	1.3604	1	1	Myeloid cell
TTGAACGGTTGATTGC_BRONCHO_58	Lung Tumor	3634.5	1887	1.22688	9	9	MAST cell
TTGAACGTCAGGTAAA_BRONCHO_58	Lung Tumor	2179.4	602	2.35589	2	2	T lymphocyte
TTGAACGTCCCAGGTG_BRONCHO_58	Lung Tumor	4447.67	3309	1.08129	1	1	Myeloid cell
TTGACTTAGAATTGTG_BRONCHO_58	Lung Tumor	2647.54	900	1.54558	0	0	T lymphocyte
TTGACTTGTTTGACTG_BRONCHO_58	Lung Tumor	2627.79	866	1.30016	0	0	T lymphocyte
TTGACTTGTTTGTTGG_BRONCHO_58	Lung Tumor	2992.09	1082	1.64334	0	0	T lymphocyte
TTGACTTTCAAAGACA_BRONCHO_58	Lung Tumor	2898.56	972	1.49097	2	2	T lymphocyte
TTGACTTTCTCGCTTG_BRONCHO_58	Lung Tumor	3461.03	1301	0.924432	2	2	T lymphocyte
TTGCCGTAGAAACGCC_BRONCHO_58	Lung Tumor	3333.02	1320	1.39749	11	11	Fibroblast
TTGCCGTAGGAGTTGC_BRONCHO_58	Lung Tumor	2661.47	798	1.58243	2	2	T lymphocyte
TTGCCGTCACCGCTAG_BRONCHO_58	Lung Tumor	3552.76	1487	1.19893	0	0	T lymphocyte
TTGCCGTGTTATCGGT_BRONCHO_58	Lung Tumor	2430.93	759	2.0291	0	0	T lymphocyte
TTGCGTCAGTGCGTGA_BRONCHO_58	Lung Tumor	1682.44	422	0.446984	8	8	Epithelial
TTGCGTCCAAGTTGTC_BRONCHO_58	Lung Tumor	2172.1	779	2.07734	0	0	T lymphocyte
TTGCGTCCATCTCCCA_BRONCHO_58	Lung Tumor	2339.84	718	2.31111	0	0	T lymphocyte
TTGCGTCGTAAATGTG_BRONCHO_58	Lung Tumor	2683.96	811	1.95837	2	2	T lymphocyte
TTGCGTCGTGGTACAG_BRONCHO_58	Lung Tumor	3605.3	1779	1.60661	1	1	Myeloid cell
TTGCGTCTCGGAATCT_BRONCHO_58	Lung Tumor	4585.73	3760	0.992888	1	1	Myeloid cell
TTGGAACAGACAGAGA_BRONCHO_58	Lung Tumor	3676.01	3333	1.92211	1	1	Myeloid cell
TTGGAACAGCCTATGT_BRONCHO_58	Lung Tumor	2618.78	870	1.80302	0	0	T lymphocyte
TTGGAACGTGCACGAA_BRONCHO_58	Lung Tumor	2969.83	1071	1.40769	0	0	T lymphocyte
TTGGCAAGTAAGGGCT_BRONCHO_58	Lung Tumor	3984.86	2512	1.39827	1	1	Myeloid cell
TTGGCAAGTGCTGTAT_BRONCHO_58	Lung Tumor	2470.42	853	1.39542	0	0	T lymphocyte
TTGGCAAGTTACCGAT_BRONCHO_58	Lung Tumor	2188.82	619	2.26256	5	5	NK cell
TTGGCAATCACTTATC_BRONCHO_58	Lung Tumor	4550.69	3629	0.975072	11	11	Fibroblast
TTGTAGGAGGTGGGTT_BRONCHO_58	Lung Tumor	2520.76	1045	1.48383	1	1	Myeloid cell
TTGTAGGGTAGATTAG_BRONCHO_58	Lung Tumor	2527.96	763	1.89974	5	5	NK cell
TTGTAGGTCAACGGGA_BRONCHO_58	Lung Tumor	2597.98	886	1.73103	2	2	T lymphocyte
TTGTAGGTCCAGATCA_BRONCHO_58	Lung Tumor	2977.01	1050	1.5294	2	2	T lymphocyte
TTGTAGGTCCCGACTT_BRONCHO_58	Lung Tumor	2832.99	969	1.39733	2	2	T lymphocyte
TTGTAGGTCGCCATAA_BRONCHO_58	Lung Tumor	2605.95	877	1.41856	0	0	T lymphocyte
TTTACTGAGTACGTAA_BRONCHO_58	Lung Tumor	2455.51	756	1.55458	0	0	T lymphocyte
TTTACTGGTTTGGCGC_BRONCHO_58	Lung Tumor	4429.85	3774	1.12889	17	17	Epithelial
TTTACTGTCATGTCCC_BRONCHO_58	Lung Tumor	4234.27	3915	1.30391	1	1	Myeloid cell
TTTACTGTCCCTCAGT_BRONCHO_58	Lung Tumor	2948.74	987	1.33496	2	2	T lymphocyte
TTTATGCAGACAAAGG_BRONCHO_58	Lung Tumor	2802.97	1032	1.29482	0	0	T lymphocyte
TTTATGCAGTCACGCC_BRONCHO_58	Lung Tumor	1972.22	503	2.23436	1	1	Myeloid cell
TTTATGCGTTACGACT_BRONCHO_58	Lung Tumor	4325.49	2754	1.05617	11	11	Fibroblast
TTTATGCGTTCCGGCA_BRONCHO_58	Lung Tumor	2435.17	731	1.93625	1	1	Myeloid cell
TTTATGCTCACCGGGT_BRONCHO_58	Lung Tumor	2441.48	696	0	1	1	Myeloid cell
TTTATGCTCGCATGAT_BRONCHO_58	Lung Tumor	3715.85	1888	1.17091	1	1	Myeloid cell
TTTCCTCAGCGATGAC_BRONCHO_58	Lung Tumor	812.226	249	0.334321	13	13	B lymphocyte
TTTCCTCAGGCTCATT_BRONCHO_58	Lung Tumor	2688.74	1034	2.17204	1	1	Myeloid cell
TTTCCTCCACCAACCG_BRONCHO_58	Lung Tumor	2932.9	1164	1.5267	0	0	T lymphocyte
TTTCCTCCATTGGTAC_BRONCHO_58	Lung Tumor	1713.33	478	3.20971	8	8	Epithelial
TTTGCGCGTACCGTAT_BRONCHO_58	Lung Tumor	2753.1	893	1.39584	9	9	MAST cell
TTTGGTTAGACAAAGG_BRONCHO_58	Lung Tumor	2786.75	937	1.6738	0	0	T lymphocyte
TTTGGTTAGTTGAGTA_BRONCHO_58	Lung Tumor	2523.42	813	1.94284	2	2	T lymphocyte
TTTGGTTCATTAACCG_BRONCHO_58	Lung Tumor	860.288	335	0.978803	13	13	B lymphocyte
TTTGGTTGTAACGCGA_BRONCHO_58	Lung Tumor	4235.5	3777	1.38671	1	1	Myeloid cell
TTTGGTTGTACGCTGC_BRONCHO_58	Lung Tumor	2335.73	708	1.72419	2	2	T lymphocyte
TTTGGTTGTGTTCGAT_BRONCHO_58	Lung Tumor	2375.08	718	2.09134	0	0	T lymphocyte
TTTGGTTTCACGGTTA_BRONCHO_58	Lung Tumor	2994.13	1049	1.21108	5	5	NK cell
TTTGGTTTCGCGTAGC_BRONCHO_58	Lung Tumor	4121.67	4341	1.34584	17	17	Epithelial
TTTGTCAAGCTAGTCT_BRONCHO_58	Lung Tumor	1274.84	306	3.5424	8	8	Epithelial
TTTGTCACAATCGAAA_BRONCHO_58	Lung Tumor	3634.56	2128	1.34203	1	1	Myeloid cell
TTTGTCACACAAGCCC_BRONCHO_58	Lung Tumor	4627.38	3985	1.04605	1	1	Myeloid cell
TTTGTCACATGCCCGA_BRONCHO_58	Lung Tumor	3947.5	3987	1.26257	17	17	Epithelial
TTTGTCAGTAGGCTGA_BRONCHO_58	Lung Tumor	2686.77	846	2.04527	2	2	T lymphocyte
ACGGGTCCATGTAGTC_BRONCHO_58	Lung Tumor	1949.39	493	0.53118	10	10	Myeloid cell
ACGTCAACATGATCCA_BRONCHO_58	Lung Tumor	1974.57	981	2.17089	13	13	B lymphocyte
ACGTCAAGTCGCATCG_BRONCHO_58	Lung Tumor	3518.79	2325	0.719707	1	1	Myeloid cell
ACGTCAAGTGTCTGAT_BRONCHO_58	Lung Tumor	3041.85	1044	1.38913	2	2	T lymphocyte
ACGTCAATCCCAAGAT_BRONCHO_58	Lung Tumor	4527.66	4464	1.25755	1	1	Myeloid cell
ACTATCTCACGGTGTC_BRONCHO_58	Lung Tumor	2894.24	1041	1.23068	0	0	T lymphocyte
ACTATCTCAGGCTGAA_BRONCHO_58	Lung Tumor	2744.02	945	1.59281	2	2	T lymphocyte
ACTATCTGTACCATCA_BRONCHO_58	Lung Tumor	2701.23	995	0.934812	14	14	T lymphocyte
ACTATCTGTGTTAAGA_BRONCHO_58	Lung Tumor	2674.04	989	1.68231	2	2	T lymphocyte
ACTATCTGTGTTCTTT_BRONCHO_58	Lung Tumor	2870.99	993	1.33906	2	2	T lymphocyte
ACTATCTGTTCGTGAT_BRONCHO_58	Lung Tumor	1249.97	354	5.27231	8	8	Epithelial
ACTATCTGTTTGACAC_BRONCHO_58	Lung Tumor	2652.15	1356	1.62191	8	8	Epithelial
ACTATCTTCGCATGGC_BRONCHO_58	Lung Tumor	4410.17	3817	1.21127	1	1	Myeloid cell
ACTGAACAGGTGCAAC_BRONCHO_58	Lung Tumor	2943.79	1178	1.74927	9	9	MAST cell
ACTGAACCAAACCCAT_BRONCHO_58	Lung Tumor	2504.42	787	1.59885	5	5	NK cell
ACTGAACCACGTAAGG_BRONCHO_58	Lung Tumor	2394.45	748	1.78063	5	5	NK cell
ACTGAACCAGCGTTCG_BRONCHO_58	Lung Tumor	2644.6	916	1.91692	2	2	T lymphocyte
ACTGAACGTTCATGGT_BRONCHO_58	Lung Tumor	2716.79	985	1.60804	5	5	NK cell
ACTGAACTCAGTGTTG_BRONCHO_58	Lung Tumor	2636.72	852	1.85741	2	2	T lymphocyte
ACTGAACTCGTATCAG_BRONCHO_58	Lung Tumor	3178.05	1143	1.52216	2	2	T lymphocyte
ACTGAGTCACTTCGAA_BRONCHO_58	Lung Tumor	3942.43	1971	1.02302	2	2	T lymphocyte
ACTGAGTGTCTTCGTC_BRONCHO_58	Lung Tumor	4059.01	5644	1.40307	17	17	Epithelial
ACTGATGAGACACTAA_BRONCHO_58	Lung Tumor	3201.05	1266	1.50825	0	0	T lymphocyte
ACTGATGAGGCCGAAT_BRONCHO_58	Lung Tumor	2969.3	1114	1.49291	1	1	Myeloid cell
ACTGATGCACAAGTAA_BRONCHO_58	Lung Tumor	2242.42	932	1.55337	1	1	Myeloid cell
ACTGATGCATGGTCAT_BRONCHO_58	Lung Tumor	605.314	227	0.876628	13	13	B lymphocyte
ACTGATGGTAGTGAAT_BRONCHO_58	Lung Tumor	3771.43	1906	1.19118	1	1	Myeloid cell
ACTGATGGTGTAATGA_BRONCHO_58	Lung Tumor	2671.63	904	1.92245	5	5	NK cell
ACTGATGTCTATCCCG_BRONCHO_58	Lung Tumor	3133.08	1255	0.951026	0	0	T lymphocyte
ACTGCTCAGCCACCTG_BRONCHO_58	Lung Tumor	2994.45	1248	1.35034	0	0	T lymphocyte
ACTGCTCCAGGTGCCT_BRONCHO_58	Lung Tumor	3207.26	1220	1.34892	0	0	T lymphocyte
ACTGTCCAGAGTACAT_BRONCHO_58	Lung Tumor	4086.76	2266	1.04312	2	2	T lymphocyte
ACTGTCCGTCCGTGAC_BRONCHO_58	Lung Tumor	2480.72	797	1.38891	0	0	T lymphocyte
ACTGTCCGTGTCGCTG_BRONCHO_58	Lung Tumor	2880.28	1028	1.67651	0	0	T lymphocyte
ACTGTCCTCCAATGGT_BRONCHO_58	Lung Tumor	4053.61	2363	1.29377	1	1	Myeloid cell
ACTGTCCTCTGCCAGG_BRONCHO_58	Lung Tumor	4605.99	8448	0.757671	17	17	Epithelial
ACTGTCCTCTTAACCT_BRONCHO_58	Lung Tumor	2698.82	865	1.62769	0	0	T lymphocyte
ACTTACTAGAGGTACC_BRONCHO_58	Lung Tumor	3394.62	1360	1.49949	11	11	Fibroblast
ACTTACTAGATACACA_BRONCHO_58	Lung Tumor	1796.84	446	0.190942	8	8	Epithelial
ACTTACTCAACGATGG_BRONCHO_58	Lung Tumor	3994.23	2164	1.27507	1	1	Myeloid cell
ACTTACTCACCATGTA_BRONCHO_58	Lung Tumor	2854.8	933	0.435872	10	10	Myeloid cell
ACTTACTGTCAGGACA_BRONCHO_58	Lung Tumor	2919.18	973	0.283959	8	8	Epithelial
ACTTACTTCTCTGAGA_BRONCHO_58	Lung Tumor	3028.94	1011	1.70074	2	2	T lymphocyte
ACTTACTTCTTCAACT_BRONCHO_58	Lung Tumor	3452.67	1456	1.3236	0	0	T lymphocyte
ACTTGTTGTAAACCTC_BRONCHO_58	Lung Tumor	3127.17	1507	1.77696	17	17	Epithelial
ACTTGTTGTACCGGCT_BRONCHO_58	Lung Tumor	2617.75	920	1.80068	0	0	T lymphocyte
ACTTGTTGTCGCTTTC_BRONCHO_58	Lung Tumor	628.124	203	6.62158	13	13	B lymphocyte
ACTTGTTGTGACCAAG_BRONCHO_58	Lung Tumor	2477.31	869	2.01389	0	0	T lymphocyte
ACTTGTTGTGTTGAGG_BRONCHO_58	Lung Tumor	2743.37	948	1.5909	0	0	T lymphocyte
ACTTGTTTCCTCAACC_BRONCHO_58	Lung Tumor	728.08	320	2.99407	13	13	B lymphocyte
ACTTTCAAGGCAAAGA_BRONCHO_58	Lung Tumor	2978.57	1032	1.26045	2	2	T lymphocyte
ACTTTCACATGCCTAA_BRONCHO_58	Lung Tumor	3929.16	3116	1.37092	1	1	Myeloid cell
ACTTTCAGTACTCAAC_BRONCHO_58	Lung Tumor	2127.44	559	2.05	1	1	Myeloid cell
ACTTTCATCACTATTC_BRONCHO_58	Lung Tumor	2605.44	794	0.21083	8	8	Epithelial
ACTTTCATCGGTCCGA_BRONCHO_58	Lung Tumor	4228.28	2341	1.25514	11	11	Fibroblast
ACTTTCATCGTACCGG_BRONCHO_58	Lung Tumor	2552.28	865	1.70873	0	0	T lymphocyte
ACTTTCATCTGCAAGT_BRONCHO_58	Lung Tumor	4163.84	2387	1.70394	17	17	Epithelial
AGAATAGCAAAGCGGT_BRONCHO_58	Lung Tumor	4828.49	5010	1.0086	17	17	Epithelial
AGAATAGTCACATACG_BRONCHO_58	Lung Tumor	2411.81	700	1.85502	0	0	T lymphocyte
AGAATAGTCGGTGTCG_BRONCHO_58	Lung Tumor	2633.45	867	1.82202	5	5	NK cell
AGACGTTAGTGACTCT_BRONCHO_58	Lung Tumor	4066.05	2750	1.34791	1	1	Myeloid cell
AGACGTTGTATAATGG_BRONCHO_58	Lung Tumor	2984.49	1057	0	10	10	Myeloid cell
AGACGTTGTCGAATCT_BRONCHO_58	Lung Tumor	2792.04	878	1.33338	2	2	T lymphocyte
AGAGCGAAGAGGTTAT_BRONCHO_58	Lung Tumor	3210.36	1788	1.19869	10	10	Myeloid cell
AGAGCGAAGGCTATCT_BRONCHO_58	Lung Tumor	2521.79	839	1.61962	2	2	T lymphocyte
AGAGCGAAGGGCACTA_BRONCHO_58	Lung Tumor	3208.5	1177	1.52793	2	2	T lymphocyte
AGAGCGACAGCGAACA_BRONCHO_58	Lung Tumor	2654.33	1131	1.70808	8	8	Epithelial
AGAGCGACAGGAATCG_BRONCHO_58	Lung Tumor	2253.17	782	1.80291	0	0	T lymphocyte
AGAGCGATCAGCAACT_BRONCHO_58	Lung Tumor	4139.12	2752	1.30108	1	1	Myeloid cell
AGAGCTTCAGTGAGTG_BRONCHO_58	Lung Tumor	4417.96	4223	1.39626	17	17	Epithelial
AGAGCTTGTAAATGAC_BRONCHO_58	Lung Tumor	2567.29	1002	1.74138	4	4	B lymphocyte
AGAGCTTGTGCCTGCA_BRONCHO_58	Lung Tumor	2239.05	684	2.51939	4	4	B lymphocyte
AGAGCTTTCGCTAGCG_BRONCHO_58	Lung Tumor	2814.6	983	1.63633	2	2	T lymphocyte
AGAGCTTTCTCATTCA_BRONCHO_58	Lung Tumor	2330.5	811	1.86638	0	0	T lymphocyte
AGAGTGGAGACTTTCG_BRONCHO_58	Lung Tumor	4520.16	3473	1.07854	11	11	Fibroblast
AGAGTGGAGCCCAACC_BRONCHO_58	Lung Tumor	4368.47	5559	1.22707	1	1	Myeloid cell
AGAGTGGAGCGTGAAC_BRONCHO_58	Lung Tumor	2959.7	1270	1.7224	0	0	T lymphocyte
AGAGTGGAGTAGGCCA_BRONCHO_58	Lung Tumor	4512.25	2777	1.07518	11	11	Fibroblast
AGAGTGGCAATGTAAG_BRONCHO_58	Lung Tumor	4404	3153	1.14782	1	1	Myeloid cell
AGAGTGGCACATCTTT_BRONCHO_58	Lung Tumor	2346.57	858	0.174391	8	8	Epithelial
AGAGTGGGTATGAATG_BRONCHO_58	Lung Tumor	3330.95	1339	1.2104	0	0	T lymphocyte
AGAGTGGTCAGCATGT_BRONCHO_58	Lung Tumor	4010.66	3163	1.31789	1	1	Myeloid cell
AGAGTGGTCCACTCCA_BRONCHO_58	Lung Tumor	2629.47	846	1.68061	0	0	T lymphocyte
AGAGTGGTCGGACAAG_BRONCHO_58	Lung Tumor	2433.78	702	1.84785	2	2	T lymphocyte
AGATCTGAGAGGTTGC_BRONCHO_58	Lung Tumor	2264.42	776	2.3471	0	0	T lymphocyte
AGATCTGAGGAGTACC_BRONCHO_58	Lung Tumor	2201.87	592	2.50514	2	2	T lymphocyte
AGATCTGCAATCTACG_BRONCHO_58	Lung Tumor	2770.26	939	1.99788	5	5	NK cell
AGATCTGCAATGGACG_BRONCHO_58	Lung Tumor	2349.9	913	2.10851	0	0	T lymphocyte
AGATCTGCAGACAAGC_BRONCHO_58	Lung Tumor	4371.82	2592	0.830311	9	9	MAST cell
AGATCTGCAGTAACGG_BRONCHO_58	Lung Tumor	2832.44	963	1.57293	2	2	T lymphocyte
AGATCTGCATACTACG_BRONCHO_58	Lung Tumor	4230.7	5422	1.07632	17	17	Epithelial
AGATCTGCATCTCCCA_BRONCHO_58	Lung Tumor	2467.51	761	1.94787	0	0	T lymphocyte
AGATCTGGTATCACCA_BRONCHO_58	Lung Tumor	2388.93	1341	1.56008	8	8	Epithelial
AGATCTGTCTCGTATT_BRONCHO_58	Lung Tumor	3021.05	1032	1.87306	2	2	T lymphocyte
AGATTGCAGACAGGCT_BRONCHO_58	Lung Tumor	2645.72	930	2.23696	5	5	NK cell
AGATTGCAGGATGCGT_BRONCHO_58	Lung Tumor	2543.5	803	1.6667	2	2	T lymphocyte
AGATTGCCAGGGAGAG_BRONCHO_58	Lung Tumor	3150.78	1220	1.25828	2	2	T lymphocyte
AGATTGCGTAAAGTCA_BRONCHO_58	Lung Tumor	4263.45	4107	1.15574	1	1	Myeloid cell
AGATTGCGTATGAATG_BRONCHO_58	Lung Tumor	2608.97	1007	1.74728	0	0	T lymphocyte
AGATTGCGTCCATCCT_BRONCHO_58	Lung Tumor	2842.96	1895	1.44516	13	13	B lymphocyte
AGATTGCGTGTGAATA_BRONCHO_58	Lung Tumor	2675.4	933	1.78207	1	1	Myeloid cell
AGATTGCGTTGATTGC_BRONCHO_58	Lung Tumor	3420.63	1932	1.21845	1	1	Myeloid cell
AGATTGCTCAATCACG_BRONCHO_58	Lung Tumor	3067.69	1105	1.47425	2	2	T lymphocyte
AGATTGCTCGTCCAGG_BRONCHO_58	Lung Tumor	2531.17	765	1.65572	2	2	T lymphocyte
AGATTGCTCTGCTGTC_BRONCHO_58	Lung Tumor	3557.59	1562	1.29572	0	0	T lymphocyte
AGCAGCCCAGCTGTAT_BRONCHO_58	Lung Tumor	2271.86	669	1.73699	1	1	Myeloid cell
AGCAGCCCAGTCTTCC_BRONCHO_58	Lung Tumor	2265.94	662	0.125514	8	8	Epithelial
AGCAGCCCATATGCTG_BRONCHO_58	Lung Tumor	2573.39	792	2.1493	2	2	T lymphocyte
AGCAGCCTCCTTGCCA_BRONCHO_58	Lung Tumor	3728.85	2155	1.31831	1	1	Myeloid cell
AGCATACAGGTTACCT_BRONCHO_58	Lung Tumor	3946.79	3290	1.34185	17	17	Epithelial
AGCATACCAAATTGCC_BRONCHO_58	Lung Tumor	4073.43	4269	1.30885	17	17	Epithelial
AGCATACCATTACGAC_BRONCHO_58	Lung Tumor	3348.22	1542	1.43858	1	1	Myeloid cell
AGCATACGTACAGTGG_BRONCHO_58	Lung Tumor	1199.72	268	2.77251	8	8	Epithelial
AGCATACGTGTTTGTG_BRONCHO_58	Lung Tumor	4002.79	3370	1.45815	17	17	Epithelial
AGCCTAAAGAGGTAGA_BRONCHO_58	Lung Tumor	2730.77	939	1.53715	0	0	T lymphocyte
AGCCTAACAACAACCT_BRONCHO_58	Lung Tumor	3061.07	1234	1.6792	1	1	Myeloid cell
AGCCTAACACCCAGTG_BRONCHO_58	Lung Tumor	3771.78	2120	1.29454	0	0	T lymphocyte
AGCCTAAGTAGAAGGA_BRONCHO_58	Lung Tumor	3720.3	2341	1.59068	17	17	Epithelial
AGCCTAAGTCAGCTAT_BRONCHO_58	Lung Tumor	2970.19	1145	2.3977	1	1	Myeloid cell
AGCCTAAGTGTAAGTA_BRONCHO_58	Lung Tumor	4173.04	3147	1.19527	1	1	Myeloid cell
AGCCTAATCGACCAGC_BRONCHO_58	Lung Tumor	4150.37	4606	1.28585	17	17	Epithelial
[truncated: 58,926 more rows]
