# Supplementary material for: Heparin binding epidermal growth factor–like growth factor is a prognostic marker correlated with levels of macrophages infiltrated in lung adenocarcinoma
Source: Front Oncol. 2022 Nov 10;12:963896. doi: 10.3389/fonc.2022.963896 (PMC9686304; doi:10.3389/fonc.2022.963896)
Supplement: Supplementary file 3 [file Table_3.xlsx]

## Sheet: Sheet1
List of 182 gene have high correlation with HB-EGF
Node1	Node 2	lower	upper	r	p
ACE	HBEGF	0.516428	0.626245	0.573911	9.16e-52
ACVRL	HBEGF	0.596356	0.691712	0.646552	1.73e-69
ADAMTS1	HBEGF	0.592242	0.68838	0.642835	1.83e-68
ADAMTS8	HBEGF	0.504312	0.616184	0.56282	1.96e-49
ADAMTSL4	HBEGF	0.501493	0.613838	0.560236	6.64e-49
ADPRH	HBEGF	0.495626	0.608949	0.554856	8.15e-48
ADRB2	HBEGF	0.557613	0.660173	0.611455	2.38e-60
AG2	HBEGF	0.554661	0.657755	0.608771	1.07e-59
AGBL1	HBEGF	0.538887	0.644798	0.594414	2.59e-56
AGER	HBEGF	0.537065	0.643298	0.592754	6.22e-56
AGRP	HBEGF	0.498291	0.61117	0.5573	2.62e-48
AKAP2	HBEGF	0.554422	0.657559	0.608554	1.2e-59
ALOX5	HBEGF	0.491787	0.605745	0.551332	4.11e-47
AMICA	HBEGF	0.491431	0.605447	0.551005	4.77e-47
ANGPT4	HBEGF	0.524675	0.633072	0.581448	2.12e-53
ANGPTL7	HBEGF	0.516286	0.626127	0.573781	9.76e-52
ANKRD1	HBEGF	0.558804	0.661148	0.612536	1.29e-60
AOC3	HBEGF	0.504596	0.61642	0.56308	1.73e-49
ARC	HBEGF	0.585329	0.682772	0.636585	8.98e-67
ARHGAP31	HBEGF	0.54557	0.650295	0.600501	9.97e-58
ARHGAP6	HBEGF	0.522696	0.631436	0.579641	5.28e-53
ARHGEF15	HBEGF	0.549859	0.653817	0.604405	1.19e-58
ATF3	HBEGF	0.61822	0.709351	0.666266	3.58e-75
BCL6B	HBEGF	0.518051	0.62759	0.575395	4.4e-52
C1054	HBEGF	0.496483	0.609663	0.555642	5.67e-48
C1067	HBEGF	0.506793	0.618247	0.565093	6.63e-50
C1315	HBEGF	0.584824	0.682362	0.636127	1.19e-66
C1959	HBEGF	0.559055	0.661353	0.612764	1.14e-60
C1162	HBEGF	0.526248	0.634372	0.582884	1.03e-53
C5AR1	HBEGF	0.647579	0.732859	0.692632	1.72e-83
C6155	HBEGF	0.519051	0.628418	0.576309	2.79e-52
CALCRL	HBEGF	0.534204	0.64094	0.590145	2.44e-55
CAV1	HBEGF	0.563104	0.664665	0.616442	1.4e-61
CAV2	HBEGF	0.498615	0.611441	0.557598	2.28e-48
CCDC141	HBEGF	0.548182	0.65244	0.602878	2.74e-58
CCL23	HBEGF	0.554009	0.657221	0.608179	1.48e-59
CD300C	HBEGF	0.541217	0.646715	0.596537	8.38e-57
CD300LG	HBEGF	0.506934	0.618364	0.565221	6.23e-50
CD36	HBEGF	0.494577	0.608074	0.553893	1.27e-47
CD83	HBEGF	0.528696	0.636395	0.58512	3.28e-54
CD93	HBEGF	0.611116	0.703632	0.659868	2.79e-73
CDH5	HBEGF	0.552867	0.656284	0.60714	2.64e-59
CLEC14	HBEGF	0.515412	0.625402	0.572982	1.45e-51
CLEC1A	HBEGF	0.566396	0.667354	0.61943	2.52e-62
CLIC5	HBEGF	0.498205	0.611099	0.557221	2.72e-48
CNTN6	HBEGF	0.510235	0.621107	0.568245	1.46e-50
CSRNP1	HBEGF	0.700286	0.774557	0.739666	8.39e-101
CXCL2	HBEGF	0.541037	0.646568	0.596373	9.15e-57
CXCL3	HBEGF	0.493657	0.607306	0.553049	1.87e-47
CYR61	HBEGF	0.585397	0.682827	0.636646	8.65e-67
CYYR1	HBEGF	0.53065	0.638008	0.586903	1.31e-54
DLC1	HBEGF	0.509035	0.62011	0.567146	2.47e-50
DOK2	HBEGF	0.509953	0.620872	0.567986	1.65e-50
DPEP2	HBEGF	0.517511	0.627142	0.574901	5.62e-52
DUSP1	HBEGF	0.591304	0.687619	0.641987	3.12e-68
ECSCR	HBEGF	0.518111	0.627639	0.575449	4.28e-52
EDNRB	HBEGF	0.533238	0.640143	0.589264	3.86e-55
EGR1	HBEGF	0.607109	0.700401	0.656256	3.11e-72
EGR2	HBEGF	0.622706	0.712956	0.670302	2.17e-76
EGR3	HBEGF	0.620504	0.711187	0.668321	8.64e-76
EMCN	HBEGF	0.505616	0.617268	0.564014	1.11e-49
EMP1	HBEGF	0.559298	0.661552	0.612985	1e-60
ERG	HBEGF	0.537575	0.643718	0.593219	4.87e-56
FABP4	HBEGF	0.556552	0.659304	0.610491	4.08e-60
FAM107A	HBEGF	0.571044	0.671148	0.623646	2.15e-63
FAM150B	HBEGF	0.51808	0.627613	0.575421	4.34e-52
FGD5	HBEGF	0.626595	0.716078	0.673799	1.84e-77
FGR	HBEGF	0.551085	0.654823	0.60552	6.45e-59
FHL1	HBEGF	0.584317	0.68195	0.635669	1.58e-66
FLI1	HBEGF	0.505437	0.617119	0.56385	1.2e-49
FOS	HBEGF	0.506186	0.617742	0.564536	8.65e-50
FOSB	HBEGF	0.657895	0.741071	0.701868	1.28e-86
FOXF1	HBEGF	0.57956	0.678083	0.631363	2.17e-65
FPR2	HBEGF	0.514485	0.624634	0.572134	2.19e-51
GADD45B	HBEGF	0.531621	0.638809	0.587789	8.29e-55
GCOM1	HBEGF	0.544557	0.649463	0.599579	1.64e-57
GIMAP8	HBEGF	0.520033	0.629231	0.577207	1.79e-52
GNAI2	HBEGF	0.492343	0.606209	0.551842	3.26e-47
GPD1	HBEGF	0.496496	0.609674	0.555653	5.64e-48
GPIHB	HBEGF	0.538662	0.644613	0.594209	2.89e-56
GPM6A	HBEGF	0.524615	0.633023	0.581394	2.18e-53
GRASP	HBEGF	0.604601	0.698377	0.653994	1.39e-71
GRK5	HBEGF	0.518891	0.628286	0.576163	3e-52
GYPE	HBEGF	0.519133	0.628486	0.576384	2.69e-52
HBA2	HBEGF	0.517964	0.627518	0.575316	4.57e-52
HEG1	HBEGF	0.498363	0.61123	0.557366	2.54e-48
HSPA12B	HBEGF	0.560309	0.662379	0.613904	5.96e-61
IL1RL1	HBEGF	0.492677	0.606488	0.552149	2.83e-47
IL3RA	HBEGF	0.531118	0.638394	0.587329	1.05e-54
IL6	HBEGF	0.512441	0.622938	0.570263	5.47e-51
ITPRIP	HBEGF	0.629538	0.718437	0.676444	2.79e-78
JAM2	HBEGF	0.516314	0.62615	0.573806	9.64e-52
JPH4	HBEGF	0.530306	0.637724	0.586589	1.54e-54
JUNB	HBEGF	0.544005	0.649009	0.599077	2.15e-57
KANK3	HBEGF	0.532397	0.639449	0.588496	5.75e-55
KIAA1462	HBEGF	0.550409	0.654268	0.604904	9.05e-59
KLF2	HBEGF	0.524337	0.632793	0.581139	2.48e-53
KLF4	HBEGF	0.59328	0.68922	0.643773	1.01e-68
KLF6	HBEGF	0.694392	0.769926	0.734425	1.08e-98
LDB2	HBEGF	0.597547	0.692676	0.647628	8.67e-70
LDLR	HBEGF	0.544868	0.649718	0.599862	1.41e-57
LIMS2	HBEGF	0.522284	0.631095	0.579264	6.39e-53
LMO2	HBEGF	0.51543	0.625417	0.572998	1.44e-51
LOC10030265	HBEGF	0.5191	0.628459	0.576354	2.73e-52
LOC1583	HBEGF	0.53979	0.645541	0.595237	1.67e-56
LOC40109	HBEGF	0.4965	0.609678	0.555658	5.62e-48
LRRC32	HBEGF	0.566162	0.667163	0.619217	2.85e-62
LRRC8C	HBEGF	0.504905	0.616677	0.563363	1.51e-49
LRRN3	HBEGF	0.494697	0.608174	0.554004	1.21e-47
LYVE1	HBEGF	0.553942	0.657166	0.608118	1.53e-59
MARCO	HBEGF	0.528131	0.635928	0.584603	4.27e-54
MMP19	HBEGF	0.582249	0.680269	0.633797	4.96e-66
MMRN2	HBEGF	0.511577	0.622221	0.569473	8.03e-51
MRC1	HBEGF	0.563304	0.664828	0.616623	1.27e-61
MS4A7	HBEGF	0.536929	0.643185	0.592629	6.64e-56
MSR1	HBEGF	0.514246	0.624435	0.571915	2.44e-51
MYADM	HBEGF	0.614523	0.706377	0.662937	3.5e-74
MYCT1	HBEGF	0.585869	0.68321	0.637072	6.65e-67
NECAB1	HBEGF	0.517164	0.626855	0.574584	6.57e-52
NLRC4	HBEGF	0.547288	0.651706	0.602065	4.27e-58
NPR1	HBEGF	0.507236	0.618615	0.565498	5.46e-50
NR4A1	HBEGF	0.503118	0.61519	0.561726	3.29e-49
NR4A3	HBEGF	0.612925	0.705089	0.661497	9.3e-74
ODF3L1	HBEGF	0.494874	0.608321	0.554166	1.12e-47
OLR1	HBEGF	0.556364	0.65915	0.610319	4.49e-60
OSCAR	HBEGF	0.53741	0.643582	0.593068	5.27e-56
OTUD1	HBEGF	0.517674	0.627277	0.57505	5.22e-52
PALM2	HBEGF	0.587625	0.684636	0.638661	2.49e-67
PCDH17	HBEGF	0.5014	0.613761	0.560151	6.91e-49
PECAM	HBEGF	0.564835	0.666079	0.618013	5.7e-62
PPP1R15A	HBEGF	0.670281	0.750898	0.712937	1.55e-90
PRAM1	HBEGF	0.491653	0.605633	0.551209	4.35e-47
PTCRA	HBEGF	0.506143	0.617707	0.564498	8.81e-50
PTGER4	HBEGF	0.541077	0.6466	0.596409	8.97e-57
PTPN21	HBEGF	0.504092	0.616001	0.562618	2.15e-49
PTPRB	HBEGF	0.518539	0.627994	0.575841	3.53e-52
PTRF	HBEGF	0.587907	0.684864	0.638916	2.12e-67
RAMP2	HBEGF	0.51	0.620911	0.568029	1.62e-50
RASGEF1B	HBEGF	0.529377	0.636957	0.585741	2.38e-54
RASGRP4	HBEGF	0.53622	0.642602	0.591983	9.32e-56
RCAN1	HBEGF	0.669684	0.750425	0.712404	2.42e-90
RETN	HBEGF	0.519308	0.628631	0.576544	2.49e-52
RHOJ	HBEGF	0.549162	0.653245	0.60377	1.69e-58
ROBO4	HBEGF	0.58039	0.678758	0.632114	1.38e-65
RS1	HBEGF	0.50578	0.617404	0.564164	1.03e-49
RTKN2	HBEGF	0.504909	0.61668	0.563366	1.51e-49
S1PR1	HBEGF	0.589154	0.685876	0.640044	1.05e-67
SDPR	HBEGF	0.516664	0.626441	0.574127	8.23e-52
SGCG	HBEGF	0.551557	0.65521	0.605949	5.09e-59
SH2B3	HBEGF	0.522054	0.630904	0.579054	7.1e-53
SH2D3C	HBEGF	0.535922	0.642356	0.591711	1.08e-55
SH2D4B	HBEGF	0.495776	0.609073	0.554993	7.65e-48
SH3GL3	HBEGF	0.531146	0.638417	0.587355	1.04e-54
SIRPB1	HBEGF	0.514363	0.624533	0.572022	2.32e-51
SLC25A25	HBEGF	0.527295	0.635237	0.58384	6.3e-54
SLC2A3	HBEGF	0.49426	0.607809	0.553602	1.45e-47
SLC6A5	HBEGF	0.542234	0.647552	0.597464	5.11e-57
SNRNP20	HBEGF	0.525268	0.633563	0.58199	1.61e-53
SOCS4	HBEGF	0.546587	0.651131	0.601427	6.04e-58
SOX18	HBEGF	0.497511	0.61052	0.556585	3.66e-48
SOX8	HBEGF	0.654209	0.738139	0.698569	1.73e-85
SPNS1	HBEGF	0.511408	0.62208	0.569318	8.66e-51
SPOCK3	HBEGF	0.493746	0.60738	0.553131	1.8e-47
STAC2	HBEGF	0.496819	0.609943	0.55595	4.91e-48
STARD3	HBEGF	0.539353	0.645182	0.594839	2.07e-56
STAT1	HBEGF	0.620203	0.710945	0.66805	1.04e-75
STX12	HBEGF	0.642289	0.728638	0.68789	6.28e-82
SYNPO2	HBEGF	0.501006	0.613432	0.55979	8.19e-49
TAL2	HBEGF	0.584025	0.681713	0.635405	1.85e-66
TCF23	HBEGF	0.512932	0.623346	0.570713	4.39e-51
TEKT1	HBEGF	0.593682	0.689546	0.644136	8.03e-69
TGFBR3	HBEGF	0.523117	0.631783	0.580025	4.36e-53
TGFBRA	HBEGF	0.506952	0.618379	0.565238	6.18e-50
THBS1	HBEGF	0.656591	0.740034	0.700701	3.23e-86
THSD1P	HBEGF	0.516205	0.62606	0.573707	1.01e-51
TIFA	HBEGF	0.547076	0.651532	0.601872	4.74e-58
TRPV3	HBEGF	0.543365	0.648482	0.598493	2.94e-57
TSPAN19	HBEGF	0.502483	0.614662	0.561144	4.33e-49
WNT7B	HBEGF	0.493924	0.607529	0.553294	1.67e-47
ZER1	HBEGF	0.512715	0.623165	0.570514	4.84e-51
ZFP36L1	HBEGF	0.628277	0.717426	0.675311	6.29e-78
