# Supplementary material for: Heparin binding epidermal growth factor–like growth factor is a prognostic marker correlated with levels of macrophages infiltrated in lung adenocarcinoma
Source: Front Oncol. 2022 Nov 10;12:963896. doi: 10.3389/fonc.2022.963896 (PMC9686304; doi:10.3389/fonc.2022.963896)
Supplement: Supplementary file 4 [file Table_4.xlsx]

## Sheet: Sheet1
The clinnical information of 30 LUAD patients for IHC staining
Patient ID	Age	TNM summary	TNM stage	Pathology grade	EGFR mutation
05092859	67	T1 N0 M0	1	2	NA
03346185	61	T2 N1 M0	2	2	Yes
04816694	57	T2 N2 M0	3	1	No
6534132	74	T1 N2 M0	3	1	NA
11420480	72	T3 N1 M0	3	NA	NA
05545773	56	T2 N1 M0	2	2	Yes
7852552	60	T1 N0 M0	1	NA	NA
08241049	70	T2 N3 M1	4	2	No
2151537	59	T1 N0 M0	1	2	NA
5233496	53	T1 N0 M0	3	2	NA
5227095	59	T1 N0 M0	1	1	NA
3832488	72	T1 N0 M0	1	2	NA
5996560	83	T1 N0 M0	1	1	NA
01444429	53	T2 N2 M0	2	2	No
6109343	70	T2 N0 M0	1	2	NA
6104865	61	T1 N0 M0	1	2	NA
796316	75	T1 N0 M0	1	3	NA
3080258	88	T2 N0 M0	1	2	NA
6456977	51	T2 N0 M0	2	2	NA
00201654	75	T3 N0 M0	2	2	NA
5923605	67	T2 N0 M0	1	2	NA
5835337	59	T2 N0 M0	1	1	NA
00042613	53	T2 N0 M1	4	3	No
02744614	69	T2 N0 M1	4	NA	No
00363776	68	T2 N0 M1	3	2	No
05883587	52	T1 N0 M0	1	2	No
00123040	65	T2 N0 M0	1	2	Yes
09947908	35	T2 N3 M1	4	2	NA
02384186	62	T2 N0 M1	4	1	No
6525615	77	T2 N0 M0	1	3	NA
