# Supplementary material for: Heparin binding epidermal growth factor–like growth factor is a prognostic marker correlated with levels of macrophages infiltrated in lung adenocarcinoma
Source: Front Oncol. 2022 Nov 10;12:963896. doi: 10.3389/fonc.2022.963896 (PMC9686304; doi:10.3389/fonc.2022.963896)
Supplement: Supplementary file 5 [file Table_5.xlsx]

## Sheet: Sheet1
Associtation between HB-EGF and subtypes of Dendritic cell, Monocyte, Macrophage and Neutrophil.
	LUAD		LUSC
Infiltrate cell	R	p	R	p
Dendritic cell
Myeloid dendritic cell_TIMER	0.336937	***	0.103592	*
Myeloid dendritic cell_XCELL	0.320492	***	0.018936	0.679958
Myeloid dendritic cell activated_XCELL	0.215901	***	-0.02241	0.625348
Myeloid dendritic cell_MCPCOUNTER	0.181564	***	-0.01641	0.720787
Myeloid dendritic cell resting_CIBERSORT-ABS	0.154867	**	-0.01576	0.731393
Myeloid dendritic cell activated_CIBERSORT-ABS	0.14582	*	0.072554	0.113531
Myeloid dendritic cell resting_CIBERSORT	0.115316	0.010393	0.006287	0.891062
Myeloid dendritic cell activated_CIBERSORT	0.102418	0.02295	0.065919	0.150583
Plasmacytoid dendritic cell_XCELL	0.026797	0.552783	-0.10208	*
Myeloid dendritic cell_QUANTISEQ	-0.11439	0.011026	-0.14171	0.001919
Monocyte
Monocyte_CIBERSORT-ABS	0.37185	***	0.003631	0.936951
Monocyte_XCELL	0.360508	***	0.137286	0.002658
Monocyte_CIBERSORT	0.30833	***	0.007913	0.863142
Macrophage/Monocyte_MCPCOUNTER	0.208758	***	0.001845	0.967943
Monocyte_MCPCOUNTER	0.208758	***	0.001845	0.967943
Monocyte_QUANTISEQ	-0.19767	***	-0.17333	**
Macrophage
Macrophage_TIMER	0.305004	***	0.088079	0.05456
Macrophage_EPIC	0.275821	***	0.022011	0.631561
Macrophage_XCELL	0.240368	***	0.009156	0.841912
Macrophage/Monocyte_MCPCOUNTER	0.208758	***	0.001845	0.967943
Macrophage M2_CIBERSORT-ABS	0.455747	***	0.071884	0.116911
Macrophage M2_CIBERSORT	0.325346	***	0.136963	0.002721
Macrophage M2_QUANTISEQ	0.263247	***	0.199286	***
Macrophage M2_XCELL	0.225692	***	-0.00597	0.89657
Macrophage M2_TIDE	-0.31851	***	-0.11022	*
Macrophage M1_QUANTISEQ	0.403073	***	0.143031	0.001738
Macrophage M1_XCELL	0.169869	**	0.018768	0.682648
Macrophage M1_CIBERSORT-ABS	0.048594	0.281547	-0.12366	0.006848
Macrophage M1_CIBERSORT	-0.09093	0.043587	-0.13188	0.00391
Macrophage M0_CIBERSORT-ABS	0.114881	0.010688	0.20225	***
Macrophage M0_CIBERSORT	0.023621	0.600827	0.227447	***
Neutrophil
Neutrophil_TIMER	0.360945	***	-0.03445	0.45281
Neutrophil_CIBERSORT-ABS	0.219991	***	0.015398	0.737299
Neutrophil_CIBERSORT	0.174669	***	0.013806	0.763613
Neutrophil_QUANTISEQ	0.098371	0.028966	0.050037	0.275428
Neutrophil_MCPCOUNTER	0.076887	0.088127	0.258134	***
Neutrophil_XCELL	0.056639	0.20933	0.00273	0.952586
P < 0.01; **P < 0.001; ***P < 0.0001.
